# Supplementary material for: DNA Repair Genes as Drug Candidates for Early Breast Cancer Onset in Latin America: A Systematic Review
Source: MDPI journal article supplement (doi:10.3390/ijms222313030), 2021-12-02
Supplement: s1 [file s1]

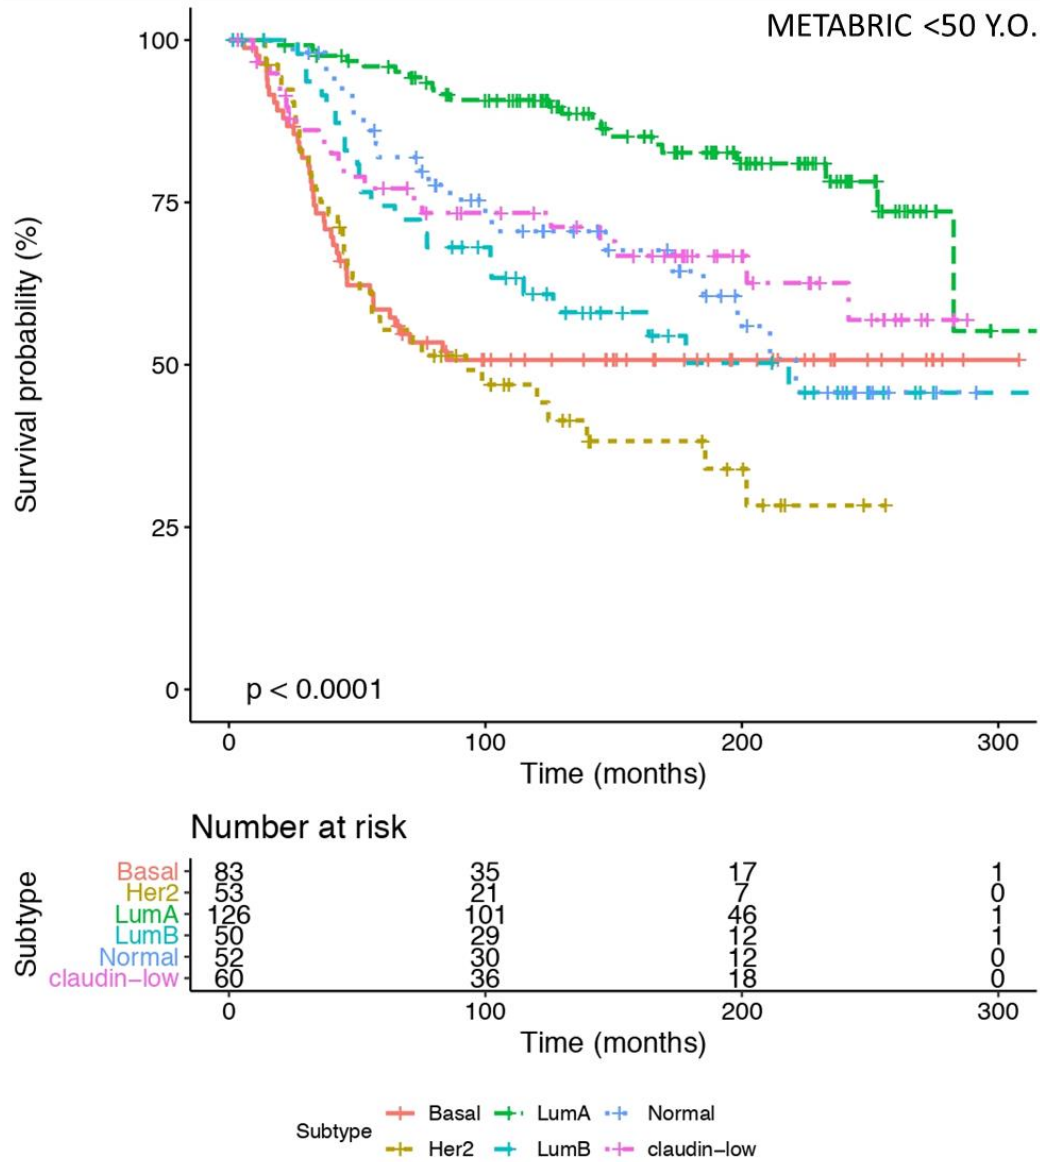

**FIGURE S1 A.** METABRIC survival by subtype classification in YWBC.

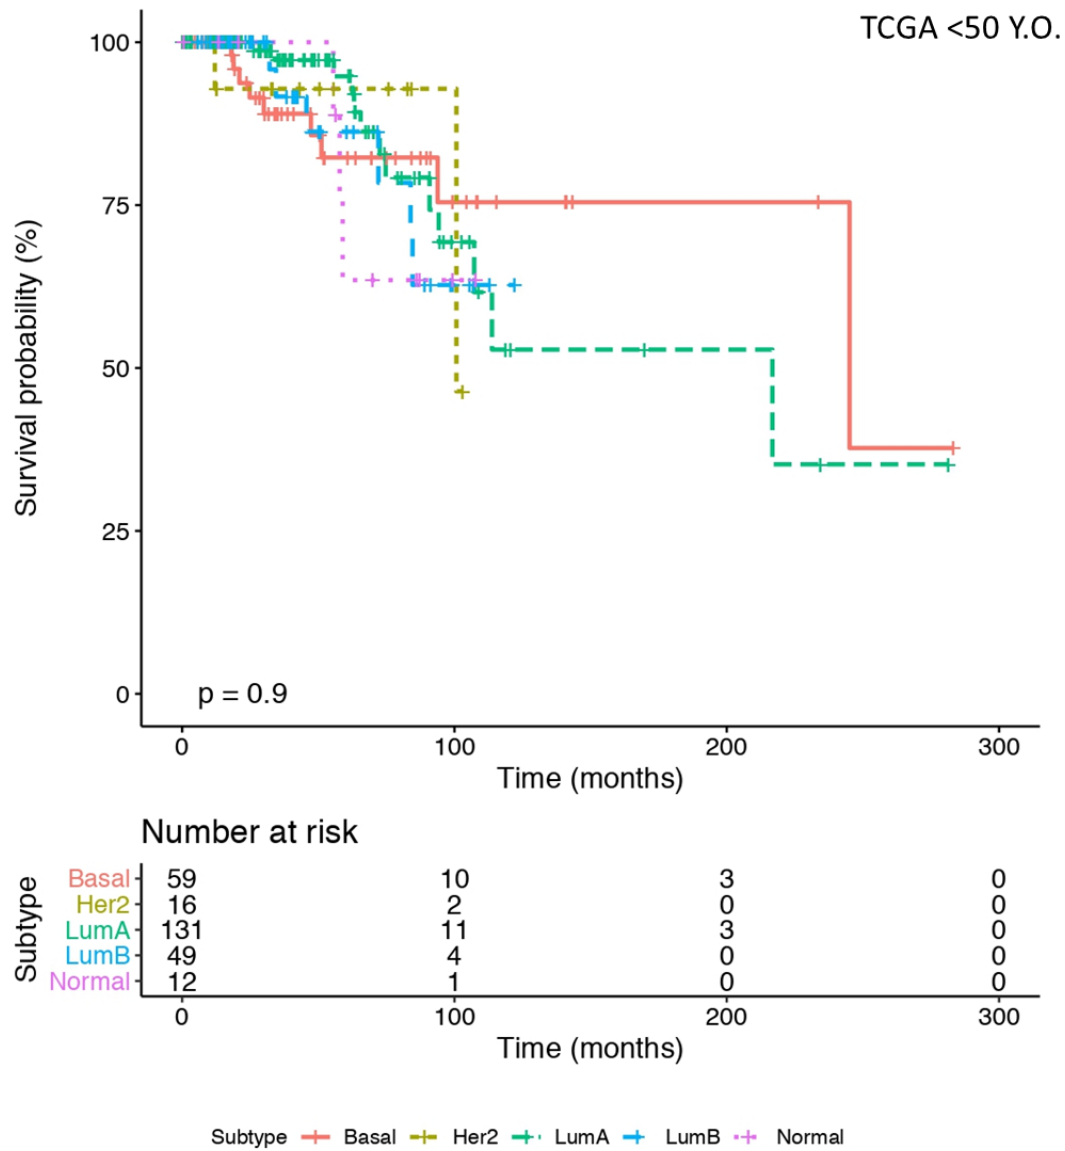

**FIGURE S1 B.** TCGA survival by subtype classification in YWBC.
