# Supplementary material for: DNA Repair Genes as Drug Candidates for Early Breast Cancer Onset in Latin America: A Systematic Review
Source: Int J Mol Sci. 2021 Dec 2;22(23):13030. doi: 10.3390/ijms222313030 (PMC8657579; doi:10.3390/ijms222313030)
Supplement: Supplementary file 1 [file ijms-22-13030-s001.zip › Supplemmentary Material-proofread.xlsx]

## Sheet: Table S1 LA BC variants
GENE	CHROMOSOME	PATIENT ID	AGE AT ONSET	COUNTRY	BC TYPE	rs	VARIANT	CONSEQUENCE	PROTEIN SHORT	ANNOTATION	POLYPHEN-2	CLINVAR	COSMIC	COSMIC ID	COSMIC CANCERS	AUTHORS	DOI
ATM	11	16	48	Colombia	ER(+), PR(+), HER2(-)	rs771887195	c.43del/c.43delC	p.Leu15Terfs	p.L15fs*	Frameshift	Not calculated	Pathogenic	Not reported	NA	NA	(Cock-Rada et al., 2018)	10.1007/s10689-017-0004-z
ATM	11	DL0117680	<40	Mexico	NA	rs1565444496	c.3602T>C	p.Phe1201Ser	F1201S	Missense	Not calculated	Uncertain significance	Not reported	NA	NA	(Gomez-Flores-Ramos et al., 2020)	10.20944/preprints202008.0718.v1
ATM	11	DL0117734	<40	Mexico	NA	rs199875915	c.2495G>T	p.Arg832Leu	R832L	Missense	Not calculated	Conflicting interpretations	Neutral (0.01)	COSV53762915	Carcinoma; unknown primary	(Gomez-Flores-Ramos et al., 2020)	10.20944/preprints202008.0718.v1
ATM	11	DL0117767	<40	Mexico	NA	rs529296539	c.8495G>T	p.Arg2832Leu	R2832L	Missense	Not calculated	Conflicting interpretations	Not reported	NA	NA	(Gomez-Flores-Ramos et al., 2020)	10.20944/preprints202008.0718.v1
ATM	11	DL0117760	<40	Mexico	NA	rs587778067	c.2449G>C	p.Asp817His	D817H	Missense	Not calculated	Uncertain significance	Not reported	NA	NA	(Gomez-Flores-Ramos et al., 2020)	10.20944/preprints202008.0718.v1
ATM	11	DL0117717	<40	Mexico	NA	rs587779841	c.4606A>G	p.Lys1536Glu	K1536E	Missense	Not calculated	Conflicting interpretations	Unknown	COSM6997561	Acute lymphoblastic leukaemia	(Gomez-Flores-Ramos et al., 2020)	10.20944/preprints202008.0718.v1
ATM	11	DL0117743	<40	Mexico	NA	rs730881375	c.5674G>A	p.Glu1892Lys	E1892_E37splice	Missense	Not calculated	Uncertain significance	Not reported	NA	NA	(Gomez-Flores-Ramos et al., 2020)	10.20944/preprints202008.0718.v1
ATM	11	DL0117769	<40	Mexico	NA	rs756898113	c.6835A>G	p.Lys2279Glu	K2279E	Missense	Not calculated	Uncertain significance	Not reported	NA	NA	(Gomez-Flores-Ramos et al., 2020)	10.20944/preprints202008.0718.v1
ATM	11	DL0117754	<40	Mexico	NA	rs776227830	c.668A>G	p.Glu223Gly	E223G	Missense	Not calculated	Uncertain significance	Not reported	NA	NA	(Gomez-Flores-Ramos et al., 2020)	10.20944/preprints202008.0718.v1
BARD1	2	NA	27	Uruguay	NA	rs587781948	c.1921C>T	p.Arg641Ter	p.R641*	Nonsense	Not calculated	Pathogenic	Pathogenic (0.94)	COSV105028526	Urinary tract	(Valle et al., 2017)	http://revista.rmu.org.uy/ojsrmu311/index.php/rmu/article/view/112
BRCA1	17	CM029	47	Venezuela	ER(-), PR(+)	rs28897687	c.3708T>G/3827T>G	p.N1236K	p.N1236K	Missense	Benign	Benign	Not reported	NA	NA	(Lara et al., 2012)	10.4067/S0716-97602012000200003
BRCA1	17	17	30	Mexico	ER(+), PR(+), HER2(-)	rs16942	c.3548A>G/c.3667A>G	p.K1183R	p.K1183R	Missense	Benign	Benign	Not reported	NA	NA	(Vaca-Paniagua et al., 2012)	10.1371/journal.pone.0037432
BRCA1	17	11	49	Mexico	ER(+), PR(+), HER2(-)	rs16942	c.3548A>G/c.3667A>G	p.K1183R	p.K1183R	Missense	Benign	Benign	Not reported	NA	NA	(Vaca-Paniagua et al., 2012)	10.1371/journal.pone.0037432
BRCA1	17	ID_2021	27	Brazil	HR(-), HER2(-)	NA	c.300T>G	p.C61G	p.C61G	Missense	Benign	Pathogenic	Not reported	NA	NA	(Carraro et al., 2013)	10.1371/journal.pone.0057581
BRCA1	17	MJ2021	≤40	Brazil	TNBC	rs28897672	c.181T>G	p.Cys61Gly	p.C61G	Missense	Benign	Pathogenic	Not reported	NA	NA	(Brianese et al., 2018)	10.1007/s10549-017-4552-6
BRCA1	17	M276	≤40	Brazil	TNBC	rs28897672	c.181T>G	p.Cys61Gly	p.C61G	Missense	Benign	Pathogenic	Not reported	NA	NA	(Brianese et al., 2018)	10.1007/s10549-017-4552-6
BRCA1	17	M355	41-50	Brazil	TNBC	rs28897672	c.181T>G	p.Cys61Gly	p.C61G	Missense	Benign	Pathogenic	Not reported	NA	NA	(Brianese et al., 2018)	10.1007/s10549-017-4552-6
BRCA1	17		29	Brazil	NA	NA	c.2910dupA	p.His971Thrfs	p.H971Tfs	Insertion	Benign	Pathogenic	Not reported	NA	NA	(Alemar et al., 2017)	10.1371/journal.pone.0187630
BRCA1	17	F13	37	Chile	NA	NA	c.300T>G	p.C61G	p.C61G	Missense	Benign	Not reported in Clinvar	Not reported	NA	NA	(Gonzalez-Hormazabal et al., 2011)	10.1007/s10549-010-1170-y
BRCA1	17	F13	37	Chile	NA	NA	c.300T>G	p.Cys61Gly	p.C61G	Missense	Benign	Not reported in ClinVar	Not reported	NA	NA	(Jara et al., 2006)	10.1016/j.cancergencyto.2005.08.019
BRCA1	17	F13	40	Chile	NA	NA	c.300T>G	p.C61G	p.C61G	Missense	Benign	Likely Benign	NOt reported	NA	NA	(Jara et al., 2004)	http://dx.doi.org/10.4067/S0716-97602004000300011
BRCA1	17	F65	44	Chile	NA	NA	c.3399T>A	p.Y1094N	p.Y1094N	Missense	Benign	Not reported in Clinvar	Not reported	NA		(Gonzalez-Hormazabal et al., 2011)	10.1007/s10549-010-1170-y
BRCA1	17	F65	44	Chile	NA	NA	c.3399T>A	p.Tyr1094Asn	p.Y1094N	Missense	Benign	Not reported in ClinVar	Not reported	NA	NA	(Jara et al., 2006)	10.1016/j.cancergencyto.2005.08.019
BRCA1	17		43	Brazil	NA	NA	c.4663delA	p.Arg1555Glyfs	p.R1555Gfs	Deletion	Benign	Pathogenic	Not reported	NA	NA	(Alemar et al., 2017)	10.1371/journal.pone.0187630
BRCA1	17		45	Brazil	NA	NA	c.5161delC	p.Gln1721Serfs*9	p.Q1721Sfs*9	Frameshift	Benign	Pathogenic	Not reported	NA	NA	(Fernandes et al., 2016)	10.18632/oncotarget.12610
BRCA1	17	AB75	49	Argentina	NA	rs28897672	c.181T>G	p.Cys61Gly	p.C61G	Missense	Benign	Pathogenic	Not reported	NA	NA	(Solano et al., 2012)	10.1186/2193-1801-1-20
BRCA1	17	AB0003E	25	Argentina	NA	rs28897672	c.181T>G	p.Cys61Gly	p.C61G	Missense	Benign	Pathogenic	Not reported	NA	NA	(Solano et al., 2017)	10.18632/oncotarget.10814.
BRCA1	17	AB0177	31	Argentina	NA	rs28897672	c.181T>G	p.Cys61Gly	p.C61G	Missense	Benign	Pathogenic	Not reported	NA	NA	(Solano et al., 2017)	10.18632/oncotarget.10814.
BRCA1	17	AB0088W	34	Argentina	NA	rs28897672	c.181T>G	p.Cys61Gly	p.C61G	Missense	Benign	Pathogenic	Not reported	NA	NA	(Solano et al., 2017)	10.18632/oncotarget.10814.
BRCA1	17	AB0052U	35	Argentina	NA	rs28897672	c.181T>G	p.Cys61Gly	p.C61G	Missense	Benign	Pathogenic	Not reported	NA	NA	(Solano et al., 2017)	10.18632/oncotarget.10814.
BRCA1	17	AB0594	46	Argentina	NA	rs28897672	c.181T>G	p.Cys61Gly	p.C61G	Missense	Benign	Pathogenic	Not reported	NA	NA	(Solano et al., 2017)	10.18632/oncotarget.10814.
BRCA1	17	AB0075	49	Argentina	NA	rs28897672	c.181T>G	p.Cys61Gly	p.C61G	Missense	Benign	Pathogenic	Not reported	NA	NA	(Solano et al., 2017)	10.18632/oncotarget.10814.
BRCA1	17	F14	38	Chile	NA	rs28897686	c.3748G>A	p.Glu1250Lys	p.E1250K	Nonsense	Benign	Benign	Neutral (0.08)	COSV58788553	Large intestine, Stomach	(Jara et al., 2004)	http://dx.doi.org/10.4067/S0716-97602004000300011
BRCA1	17		43	Brazil	NA	rs80357280	c.3823A>G	p.Ile1275Val	p.I1275V	Missense	Benign	Benign	Neutral (0.03)	COSV100525496	Meninges	(Fernandes et al., 2016)	10.18632/oncotarget.12610
BRCA1	17		26	Brazil	NA	rs80357389	c.4484G>A	p.Arg1495Lys	p.R1495K	Splice site	Benign	Pathogenic/Likely pathogenic	Not reported	NA	NA	(Fernandes et al., 2016)	10.18632/oncotarget.12610
BRCA1	17		28	Brazil	NA	NA	c.5153-2A>C	NA	NA	Polymorphism	Not calculated	Not provided	Not reported	NA	NA	(Fernandes et al., 2016)	10.18632/oncotarget.12610
BRCA1	17		33	Brazil	NA	rs80358344	c.5062_5064delGTT	p.Val1688del	p.V1688del	Deletion	Not calculated	Pathogenic	Not reported	NA		(Fernandes et al., 2016)	10.18632/oncotarget.12610
BRCA1	17		36	Brazil	NA	rs80358348	c.5425_5430delGTTGTG	p.Val1809_Val1810del	p.VV1809del	Deletion	Not calculated	Uncertain significance	Not reported	NA	NA	(Fernandes et al., 2016)	10.18632/oncotarget.12610
BRCA1	17	CM039	36	Venezuela	ER(-), PR(-), HER2(-)	rs4986852	c.3119G>A/c.3238G>A	p.S1040N	p.S1040N	Missense	Possibly damaging	Benign	Neutral (0.02)	COSV58791858	Prostate, soft tissue, adrenal gland, ovary, meninges	(Lara et al., 2012)	10.4067/S0716-97602012000200003
BRCA1	17	7	28	Mexico	TNBC	rs4986852	c.3119G>A	p.Ser1040Asn	p.S1040N	Missense	Possibly damaging	Benign	Neutral (0.02)	COSV58791858	Prostate, Soft tissue, Adrenal gland, Ovary, Meninges	(Vaca-Paniagua et al., 2012)	10.1371/journal.pone.0037432
BRCA1	17	CM065	30	Venezuela	NA	NA	c.179A>C	p.K20N	p.K20N	Missense	Possibly damaging	Not reported in ClinVar	Not reported	NA	NA	(Lara et al., 2012)	10.4067/S0716-97602012000200003
BRCA1	17		40	Brazil	NA	NA	c.2250dupC	p.Met751Hisfs	p.M751Hfs	Insertion	Possibly damaging	Pathogenic	Not reported	NA	NA	(Alemar et al., 2017)	10.1371/journal.pone.0187630
BRCA1	17	F16	48	Chile	NA	NA	c.465G>C	p.E116Q	p.E116Q	Missense	Possibly damaging	Not reported in Clinvar	Not reported	NA	NA	(Gonzalez-Hormazabal et al., 2011)	10.1007/s10549-010-1170-y
BRCA1	17	F16	48	Chile	NA	NA	c.465G>C	p.Glu116Gln	p.E116Q	Missense	Possibly damaging	Not reported in ClinVar	Not reported	NA	NA	(Jara et al., 2006)	10.1016/j.cancergencyto.2005.08.019
BRCA1	17	F25	46	Chile	NA	rs16941	c.3113A>G	p.Glu1038Gly	p.E1038G	Polymorphism	Possibly damaging	Benign	Neutral (0.05)	COSV58786412	Prostata, Meninges, Pancreas, Haematopoietic and lymphoid, Penis	(Jara et al., 2004)	http://dx.doi.org/10.4067/S0716-97602004000300011
BRCA1	17	AB0081U	45	Argentina	NA	rs786202620	c.341C>G	p.Ser114Cys	p.S114C	Missense	Possibly damaging	Uncertain significance	Not reported	NA	NA	(Solano et al., 2017)	10.18632/oncotarget.10814.
BRCA1	17	M280	≤40	Brazil	TNBC	NA	c.1123_1124delinsA	p.Leu375Lysfs*19	p.L375Kfs*19	Frameshift	Probably damaging	Not reported in Clinvar	Not reported	NA	NA	(Brianese et al., 2018)	10.1007/s10549-017-4552-6
BRCA1	17	A9	15	Argentina	TNBC	rs1799950	c.1067A>G	p.Gln356Arg	p.Q356R	Missense	Probably damaging	Benign	Pathogenic (0.90)	COSV58788306	Meninges, Breast, Soft tissue, Prostate and Large intestine	(Aceto et al., 2010)	10.1007/s10549-009-0596-6
BRCA1	17		49	Brazil	NA	rs56012641	c.1648A>C	p.Asn550His	p.N550H	Missense	Probably damaging	Benign	Neutral (0.13)	COSV58790863	Haematopoietic	(Fernandes et al., 2016)	10.18632/oncotarget.12610
BRCA1	17		28	Brazil	NA	rs80356959	c.5509T>C	p.Trp1837Arg	p.W1837R	Polymorphism	Probably damaging	Pathogenic	Not reported	NA	NA	(Fernandes et al., 2016)	10.18632/oncotarget.12610
BRCA1	17		30	Brazil	NA	rs80357064	c.190T>C	p.Cys64Arg	p.C64*	Polymorphism	Probably damaging	Pathogenic	Not reported	NA	NA	(Fernandes et al., 2016)	10.18632/oncotarget.12610
BRCA1	17	DL0117756	<40	Mexico	NA	rs62625308	c.3607C>G	p.Arg1203Gly	R1203G	Missense	Not calculated	Uncertain significance	Not reported	NA	NA	(Gomez-Flores-Ramos et al., 2020)	10.20944/preprints202008.0718.v1
BRCA1	17	A11	12	Argentina	Basal	NA	c.442-34C	IVS7	NA	Polymorphisms	Not calculated	Not reported in Clinvar	Not reported	NA	NA	(Aceto et al., 2010)	10.1007/s10549-009-0596-6
BRCA1	17	A11	12	Argentina	Basal	rs1060915	c.4308C>T	p.Ser1436Ser	p.S1436=	Synonymous	Not calculated	Benign	Pathogenic (0.90)	COSV58783806	Meninges, Prostate, Lung, Large intestine and Haematopoietic and lymphoid	(Aceto et al., 2010)	10.1007/s10549-009-0596-6
BRCA1	17	A11	12	Argentina	Basal	rs3092994	c.5152+66G>A	IVS18+66G>A	NA	Polymorphisms	Not calculated	Benign	Neutral (0.02)	COSV58793783	Lung, Haematopoietic and lymphoid and Upper aerodigestive tract	(Aceto et al., 2010)	10.1007/s10549-009-0596-6
BRCA1	17	A11	12	Argentina	Basal	rs8176144	c.548-58delT	IVS8-58del	NA	Deletion	Not calculated	Benign	Not reported	NA	NA	(Aceto et al., 2010)	10.1007/s10549-009-0596-6
BRCA1	17	CM055	48	Venezuela	ER(-), PR(-)	NA	c.1129_1135insA	NA	NA	Frameshift	Not calculated	Not reported in ClinVar	Not reported	NA	NA	(Lara et al., 2012)	10.4067/S0716-97602012000200003
BRCA1	17	CM055	48	Venezuela	ER(-), PR(-)	rs80358341	c.4063_4065delAAT/4182_4184delAAT	p.N1355del	p.N1355del	Inframe deletion	Not calculated	Conflicting interpretations	Not reported	NA	NA	(Lara et al., 2012)	10.4067/S0716-97602012000200003
BRCA1	17	34.2	39	Brazil	ER(-), PR(-), HER2(-)	rs80357382	c.211A>G	p.Arg71Gly	p.R71G	Missense	Not calculated	Pathogenic	Pathogenic (0.96)	COSV58798129	Thyroid	(Felix et al., 2014)	10.1038/hgv.2014.12
BRCA1	17	80.2	46	Brazil	ER(-), PR(-), HER2(-)	rs80357382	c.211A>G	p.Arg71Gly	p.R71G	Missense	Not calculated	Pathogenic	Pathogenic (0.96)	COSV58798129	Thyroid	(Felix et al., 2014)	10.1038/hgv.2014.12
BRCA1	17	106.1	46	Brazil	ER(-), PR(-), HER2(-)	rs80357382	c.211A>G	p.Arg71Gly	p.R71G	Missense	Not calculated	Pathogenic	Pathogenic (0.96)	COSV58798129	Thyroid	(Felix et al., 2014)	10.1038/hgv.2014.12
BRCA1	17	98.2	38	Brazil	ER(-), PR(-), HER2(-)	rs80357701	c.3331_3334delCAAG/3450delCAAG/3450del4/3450_3453delCAAG	p.Gln1111Asnfs	p.Q1111Nfs	Frameshift	Not calculated	Pathogenic	Not reported	NA	NA	(Felix et al., 2014)	10.1038/hgv.2014.12
BRCA1	17	105.1	39	Brazil	ER(-), PR(+), HER2(-)	rs80357382	c.211A>G	p.Arg71Gly	p.R71G	Missense	Not calculated	Pathogenic	Pathogenic (0.96)	COSV58798129	Thyroid	(Felix et al., 2014)	10.1038/hgv.2014.12
BRCA1	17	MP032	29	Brazil	ER(+), HER(+)	rs80357868	c.3756_3759delGTCT	p.Ser1253Argfs*10	p.S1253Rfs*10	Frameshift	Not calculated	Pathogenic	Not reported	NA	NA	(Cipriano et al., 2018)	10.1007/s12282-018-00938-z
BRCA1	17	CM001	37	Venezuela	ER(+), PR(+)	NA	c.1129_1135insA	NA	NA	Frameshift	Not calculated	Not reported in ClinVar	Not reported	NA	NA	(Lara et al., 2012)	10.4067/S0716-97602012000200003
BRCA1	17	MP062	47	Brazil	ER(+), PR(+)	rs80357701	c.3331_3334delCAAG	p.Gln1111AsnfsTer5	p.Q1111Nfs*5	Frameshift	Not calculated	Pathogenic	Not reported	NA	NA	(Cipriano et al., 2018)	10.1007/s12282-018-00938-z
BRCA1	17	CM001	37	Venezuela	ER(+), PR(+)	rs80358341	c.4063_4065delAAT/4182_4184delAAT	p.N1355del	p.N1355del	Inframe deletion	Not calculated	Conflicting interpretations	Not reported	NA	NA	(Lara et al., 2012)	10.4067/S0716-97602012000200003
BRCA1	17	17	30	Mexico	ER(+), PR(+), HER2(-)	NA	NA	p.K1489E	p.K1489E	Missense	Not calculated	Uncertain significance	Not reported	NA	NA	(Vaca-Paniagua et al., 2012)	10.1371/journal.pone.0037432
BRCA1	17	30	24	Mexico	ER(+), PR(+), HER2(+)	rs80356920	c.5411T>A	p.V1804D	p.V1804D	Missense	Not calculated	Benign	Neutral (0.02)	COSV99070449	Breast	(Vaca-Paniagua et al., 2012)	10.1371/journal.pone.0037432
BRCA1	17	ID_2017	29	Brazil	HR(-), HER2(-)	rs397507247	c.5266dupC	p.Gln1756Profs*74	p.Q1756Pfs*74	Frameshift	Not calculated	Pathogenic	Not reported	NA	NA	(Carraro et al., 2013)	10.1371/journal.pone.0057581
BRCA1	17	ID_2034	25	Brazil	HR(-), HER2(-)	rs80357123	c.5251C>T	p.Arg1751Ter	p.R1751*	Nonsense	Not calculated	Pathogenic	Pathogenic (0.77)	COSV58785164	NS and Stomach	(Carraro et al., 2013)	10.1371/journal.pone.0057581
BRCA1	17	ID_2026	31	Brazil	HR(-), HER2(-)	rs80357701	c.3331_3334delCAAG/3450del4	p.Gln1111Asnfs	p.Q1111Nfs	Frameshift	Not calculated	Pathogenic	Not reported	NA	NA	(Carraro et al., 2013)	10.1371/journal.pone.0057581
BRCA1	17	ID_4010	35	Brazil	HR(-), HER2(-)	rs80357706	c.2405_2406delTG/2524delTG	p.Val802Glufs*7	p.V802Efs*7	Frameshift	Not calculated	Pathogenic	Not reported	NA	NA	(Carraro et al., 2013)	10.1371/journal.pone.0057581
BRCA1	17	ID_2023	33	Brazil	HR(-), HER2(+)	rs397507247	c.5266dupC	p.Gln1756Profs*74	p.Q1756Pfs*74	Frameshift	Not calculated	Pathogenic	Not reported	NA	NA	(Carraro et al., 2013)	10.1371/journal.pone.0057581
BRCA1	17	ID_1014	29	Brazil	HR(+), HER2(-)	NA	c.560+2T>A	p.Ser127Thrfs*11	p.S127Tfs*11	NA	Not calculated	Not reported in Clinvar	Not reported	NA	NA	(Carraro et al., 2013)	10.1371/journal.pone.0057581
BRCA1	17	A18	21	Argentina	Luminal A	NA	c.442-34T>C	IVS7	NA	NA	Not calculated	Not reported in Clinvar	Not reported	NA	NA	(Aceto et al., 2010)	10.1007/s10549-009-0596-6
BRCA1	17	20	38	Uruguay	NA	NA	2687T>G	NA	NA	Nonsense	Not calculated	Not reported in ClinVar	Not reported	NA	NA	(Delgado et al., 2011)	10.1007/s10549-010-1320-2
BRCA1	17	14	29	Mexico	NA	NA	3587delT	p.Asp1156fsX1159	p.D1156fs	Frameshift	Not calculated	Pathogenic	Not reported	NA	NA	(Calderón-Garcidueñas et al., 2005)	http://www.scielo.org.mx/scielo.php?pid=S0036-36342005000200004&script=sci_abstract&tlng=en
BRCA1	17	19	27	Mexico	NA	NA	3587delT	p.Asp1156fsX1159	p.D1156fs	Frameshift	Not calculated	Pathogenic	Not reported	NA	NA	(Ruiz-Flores et al., 2002)	10.1002/humu.9084
BRCA1	17	M0-28	48	Brazil	NA	NA	amplification/duplication exon 24	NA	NA	large genomic arrangement	Not calculated	Not reported in Clinvar	Not reported	NA	NA	(Silva et al., 2014)	10.1186/1471-2350-15-55
BRCA1	17	AB0064X	35	Argentina	NA	NA	c.1-?_80+?del	NA	NA	Splice donor	Not calculated	Pathogenic	Not reported	NA	NA	(Solano et al., 2017)	10.18632/oncotarget.10814.
BRCA1	17	AB0627	40	Argentina	NA	NA	c.1-?_80+?del	NA	NA	Splice donor	Not calculated	Pathogenic	Not reported	NA	NA	(Solano et al., 2017)	10.18632/oncotarget.10814.
BRCA1	17	AB0473	31	Argentina	NA	NA	c.135-?_670+?del	NA	NA	Deletion	Not calculated	Pathogenic	Not reported	NA	NA	(Solano et al., 2017)	10.18632/oncotarget.10814.
BRCA1	17	SM-80	42	Brazil	NA	NA	c.1446A>T	p.K443X	p.K443X	Nonsense	Not calculated	Not reported in Clinvar	Not reported	NA	NA	(Silva et al., 2014)	10.1186/1471-2350-15-55
BRCA1	17	AB0020	32	Argentina	NA	NA	c.1502_1505delAATT	p.Lys501=fs	p.K501=fs	FrameShift	Not calculated	Pathogenic	Not reported	NA	NA	(Solano et al., 2017)	10.18632/oncotarget.10814.
BRCA1	17	AB20	32	Argentina	NA	NA	c.1502_1505delAATT	p.Lys501=fs	p.K501=fs	Truncating	Not calculated	Pathogenic	Not reported	NA	NA	(Solano et al., 2012)	10.1186/2193-1801-1-20
BRCA1	17	F84	40	Chile	NA	NA	c.2605_2606delTT	p.F829Stop	p.F829*	Frameshift	Not calculated	Not reported in Clinvar	Not reported	NA	NA	(Gonzalez-Hormazabal et al., 2011)	10.1007/s10549-010-1170-y
BRCA1	17	F43	45	Chile	NA	NA	c.2605_2606delTT	p.F829Stop	p.F829*	Frameshift	Not calculated	Not reported in Clinvar	Not reported	NA	NA	(Gonzalez-Hormazabal et al., 2011)	10.1007/s10549-010-1170-y
BRCA1	17	F43	45	Chile	NA	NA	c.2605_2606delTT	p.Phe829Stop	p.F829*	Nonsense	Not calculated	Not reported in ClinVar	Not reported	NA	NA	(Jara et al., 2006)	10.1016/j.cancergencyto.2005.08.019
BRCA1	17	MO-38	42	Brazil	NA	NA	c.307T>A	p.L63X	p.L63X	Nonsense	Not calculated	Not reported in Clinvar	Not reported	NA	NA	(Silva et al., 2014)	10.1186/1471-2350-15-55
BRCA1	17	3	33	Mexico	NA	NA	c.3124_3133delAGCAATATTA	NA	NA	Frameshift	Not calculated	Not reported in Clinvar	Not reported	NA	NA	(Vaca-Paniagua et al., 2012)	10.1371/journal.pone.0037432
BRCA1	17	F36	27	Chile	NA	NA	c.3450_3453delCAAG	p.Q1111fs	p.Q1111fs	Frameshift	Not calculated	Not reported in Clinvar	Not reported	NA	NA	(Gonzalez-Hormazabal et al., 2011)	10.1007/s10549-010-1170-y
BRCA1	17	F298	35	Chile	NA	NA	c.3450_3453delCAAG	p.Q1111fs	p.Q1111fs	Frameshift	Not calculated	Not reported in Clinvar	Not reported	NA	NA	(Gonzalez-Hormazabal et al., 2011)	10.1007/s10549-010-1170-y
BRCA1	17	F36	27	Chile	NA	NA	c.3450_3453delCAAG	p.Gln1111fs	p.Q1111fs	Frameshift	Not calculated	Not reported in ClinVar	Not reported	NA	NA	(Jara et al., 2006)	10.1016/j.cancergencyto.2005.08.019
BRCA1	17	F203	36	Chile	NA	NA	c.3977_3980delTGAG	p.S1286fs	p.S1286fs	Frameshift	Not calculated	Not reported in Clinvar	Not reported	AN	NA	(Gonzalez-Hormazabal et al., 2011)	10.1007/s10549-010-1170-y
BRCA1	17	F21	49	Chile	NA	NA	c.4185_4188delCAAG	p.Q1356fs	p.Q1356fs	Frameshift	Not calculated	Not reported in Clinvar	Not reported	NA	NA	(Gonzalez-Hormazabal et al., 2011)	10.1007/s10549-010-1170-y
BRCA1	17	F21	49	Chile	NA	NA	c.4185_4188delCAAG	p.Gln1356fs	p.Q1356fs	Frameshift	Not calculated	Not reported in ClinVar	Not reported	NA	NA	(Jara et al., 2006)	10.1016/j.cancergencyto.2005.08.019
BRCA1	17	SM-89	40	Brazil	NA	NA	c.4406C>A	p.Y1429X	p.Y1429X	Nonsense	Not calculated	Not reported in Clinvar	Not reported	NA	NA	(Silva et al., 2014)	10.1186/1471-2350-15-55
BRCA1	17	AB006H	37	Argentina	NA	NA	c.4485-?_4986+?del	NA	NA	Deletion	Not calculated	Pathogenic	Not reported	NA	NA	(Solano et al., 2017)	10.18632/oncotarget.10814.
BRCA1	17	117-BA	49	Brazil	NA	NA	c.4675+467_5075-990del	NA	NA	Deletion	Not calculated	Not reported in ClinVar	Not reported	NA	NA	(Ewald et al., 2016)	10.1590/1678-4685-GMB-2014-0350
BRCA1	17	SM-50	36	Brazil	NA	NA	c.4794+1G>A	NA	NA	Splice site	Not calculated	Not reported in Clinvar	Not reported	NA	NA	(Silva et al., 2014)	10.1186/1471-2350-15-55
BRCA1	17	MO-13	32	Brazil	NA	NA	c.4831del5(TCTCT)	NA	NA	Frameshift	Not calculated	Not reported in Clinvar	Not reported	NA	NA	(Silva et al., 2014)	10.1186/1471-2350-15-55
BRCA1	17	30430	32	Cuba	NA	NA	c.5231delT	NA	NA	Deletion	Not calculated	Not reported in ClinVar	Not reported	NA	NA	(Rodriguez et al., 2008)	10.1007/s10689-008-9187-7
BRCA1	17	AB97	38	Argentina	NA	NA	c.5263insC	Stop cod1829	NA	Truncating	Not calculated	Benign	Not reported	NA	NA	(Solano et al., 2012)	10.1186/2193-1801-1-20
BRCA1	17	AB55	49	Argentina	NA	NA	c.5263insC	Stop cod1829	NA	Truncating	Not calculated	Benign	Not reported	NA	NA	(Solano et al., 2012)	10.1186/2193-1801-1-20
BRCA1	17		37	Argentina	NA	NA	c.5407-?_(*1_?)del	NA	NA	Deletion	Not calculated	Pathogenic	Not reported	NA	NA	(Solano et al., 2018)	10.3389/fonc.2018.00323
BRCA1	17	D2073	35	Mexico	NA	NA	c.548?_4185?del	14.7-kb deletion	NA	NA	Not calculated	Not reported in Clinvar	Not reported	NA	NA	(Torres-Mejia et al., 2015)	10.1158/1055-9965.EPI-13-0980
BRCA1	17	V3236	37	Mexico	NA	NA	c.548?_4185?del	14.7-kb deletion	NA	NA	Not calculated	Not reported in Clinvar	Not reported	NA	NA	(Torres-Mejia et al., 2015)	10.1158/1055-9965.EPI-13-0980
BRCA1	17	M1209	43	Mexico	NA	NA	c.548?_4185?del	14.7-kb deletion	NA	NA	Not calculated	Not reported in Clinvar	Not reported	NA	NA	(Torres-Mejia et al., 2015)	10.1158/1055-9965.EPI-13-0980
BRCA1	17	M1916	43	Mexico	NA	NA	c.548?_4185?del	14.7-kb deletion	NA	NA	Not calculated	Not reported in Clinvar	Not reported	NA	NA	(Torres-Mejia et al., 2015)	10.1158/1055-9965.EPI-13-0980
BRCA1	17	D2062	44	Mexico	NA	NA	c.548?_4185?del	14.7-kb deletion	NA	NA	Not calculated	Not reported in Clinvar	Not reported	NA	NA	(Torres-Mejia et al., 2015)	10.1158/1055-9965.EPI-13-0980
BRCA1	17	M1954	44	Mexico	NA	NA	c.548?_4185?del	14.7-kb deletion	NA	NA	Not calculated	Not reported in Clinvar	Not reported	NA	NA	(Torres-Mejia et al., 2015)	10.1158/1055-9965.EPI-13-0980
BRCA1	17	M1761	46	Mexico	NA	NA	c.548?_4185?del	14.7-kb deletion	NA	NA	Not calculated	Not reported in Clinvar	Not reported	NA	NA	(Torres-Mejia et al., 2015)	10.1158/1055-9965.EPI-13-0980
BRCA1	17	MO-15	43	Brazil	NA	NA	c.560+2T>A	p.Ser127Thrfs*11	p.S127Tfs*11	Splice site	Not calculated	Not reported in Clinvar	Not reported	NA	NA	(Silva et al., 2014)	10.1186/1471-2350-15-55
BRCA1	17	AB0353	35	Argentina	NA	NA	c.671-?_4675+?del	NA	NA	Deletion	Not calculated	Pathogenic	Not reported	NA	NA	(Solano et al., 2017)	10.18632/oncotarget.10814.
BRCA1	17	AB82	34	Argentina	NA	NA	c.67insA	Stop cod40	NA	Truncating	Not calculated	Not reported in ClinVar	Not reported	NA	NA	(Solano et al., 2012)	10.1186/2193-1801-1-20
BRCA1	17	AB36	46	Argentina	NA	NA	c.797_798delTT	Stop cod285	NA	Truncating	Not calculated	Not reported in ClinVar	Not reported	NA	NA	(Solano et al., 2012)	10.1186/2193-1801-1-20
BRCA1	17		31,5	Uruguay	NA	NA	deletion exon 14	NA	NA	Deletion	Not calculated	Not reported in ClinVar	Not reported	NA	NA	(Valle et al., 2017)	http://revista.rmu.org.uy/ojsrmu311/index.php/rmu/article/view/112
BRCA1	17	SM-03	36	Brazil	NA	NA	deletion exon 16–17	NA	NA	Large genomic arrangement	Not calculated	Not reported in Clinvar	Not reported	NA	NA	(Silva et al., 2014)	10.1186/1471-2350-15-55
BRCA1	17		39	Brazil	NA	NA	deletion exon 3	NA	NA	NA	Not calculated	Not reported in Clinvar	Not reported	NA	NA	(Alemar et al., 2017)	10.1371/journal.pone.0187630
BRCA1	17		30	Brazil	NA	NA	deletion exon 8	NA	NA	NA	Not calculated	Not reported in Clinvar	Not reported	NA	NA	(Alemar et al., 2017)	10.1371/journal.pone.0187630
BRCA1	17		42	Brazil	NA	NA	deletion exons 1-2	NA	NA	Deletion	Not calculated	Not reported in Clinvar	Not reported	NA	NA	(Alemar et al., 2017)	10.1371/journal.pone.0187630
BRCA1	17		43	Brazil	NA	NA	deletion exons 4-6	NA	NA	Deletion	Not calculated	Not reported in Clinvar	Not reported	NA	NA	(Alemar et al., 2017)	10.1371/journal.pone.0187630
BRCA1	17	24-RS	41	Brazil	NA	NA	deletion exons 9-19	NA	NA	Deletion	Not calculated	Not reported in ClinVar	Not reported	NA	NA	(Ewald et al., 2016)	10.1590/1678-4685-GMB-2014-0350
BRCA1	17	12	34	Mexico	NA	NA	G2364T	p.Asp749Tyr	p.D749Y	Missense	Not calculated	Uncertain significance	Not reported	NA	NA	(Calderón-Garcidueñas et al., 2005)	http://www.scielo.org.mx/scielo.php?pid=S0036-36342005000200004&script=sci_abstract&tlng=en
BRCA1	17	AB0278	36	Argentina	NA	rs1057518636	c.5463_5464insT	p.His1822Serfs	p.H1822Sfs	FrameShift	Not calculated	Pathogenic	Not reported	NA	NA	(Solano et al., 2017)	10.18632/oncotarget.10814.
BRCA1	17		45	Brazil	NA	rs1555581017	c.4736_4739delCTTC	p.Pro1579Leufs	p.P1579Lfs	Deletion	Not calculated	Pathogenic	Not reported	NA	NA	(Alemar et al., 2017)	10.1371/journal.pone.0187630
BRCA1	17	AB0017	31	Argentina	NA	rs1555587135	c.3758_3759delCT	p.Ser1253*	p.S1253*	FrameShift	Not calculated	Pathogenic	Not reported	NA	NA	(Solano et al., 2017)	10.18632/oncotarget.10814.
BRCA1	17	AB17	31	Argentina	NA	rs1555587135	c.3758_3759delCT	p.Ser1253Stop	p.S1253*	Truncating	Not calculated	Pathogenic	Not reported	NA	NA	(Solano et al., 2012)	10.1186/2193-1801-1-20
BRCA1	17	27	29	Colombia	NA	rs1800062	c.114G>A/233G>A	p.Lys38=	p.K38=	Silent	Not calculated	Benign	Not reported	NA	NA	(Torres et al., 2007)	10.1007/s10549-006-9370-1
BRCA1	17	26	32	Colombia	NA	rs1800062	c.114G>A/233G>A	p.Lys38=	p.K38=	Silent	Not calculated	Benign	Not reported	NA	NA	(Torres et al., 2007)	10.1007/s10549-006-9370-1
BRCA1	17	AB0311	38	Argentina	NA	rs273900717	c.3839_3843delCTCAGinsAGGC	p.Ser1280Terfs	p.S1280*fs	Nonsense	Not calculated	Pathogenic	Not reported	NA	NA	(Solano et al., 2017)	10.18632/oncotarget.10814.
BRCA1	17		37,6	Uruguay	NA	rs273902769	c.5464_5465insT	p.His1822Leufs	p.H1822Lfs	Insertion	Not calculated	Pathogenic	Not reported	NA	NA	(Valle et al., 2017)	http://revista.rmu.org.uy/ojsrmu311/index.php/rmu/article/view/112
BRCA1	17	D2377	39	Mexico	NA	rs28897696	c.5123C>A	p.Ala1708Glu	p.A1708E	Missense	Not calculated	Pathogenic	Pathogenic (0.96)	COSV58803602	Lung	(Torres-Mejia et al., 2015)	10.1158/1055-9965.EPI-13-0980
BRCA1	17	D2090	42	Mexico	NA	rs28897696	c.5123C>A	p.Ala1708Glu	p.A1708E	Missense	Not calculated	Pathogenic	Pathogenic (0.96)	COSV58803602	Lung	(Torres-Mejia et al., 2015)	10.1158/1055-9965.EPI-13-0980
BRCA1	17	M1895	49	Mexico	NA	rs28897696	c.5123C>A	p.Ala1708Glu	p.A1708E	Missense	Not calculated	Pathogenic	Pathogenic (0.96)	COSV58803602	Lung	(Torres-Mejia et al., 2015)	10.1158/1055-9965.EPI-13-0980
BRCA1	17	AB0032E	24	Argentina	NA	rs28897696	c.5123C>A	p.Ala1708Glu	p.A1708E	Missense	Not calculated	Pathogenic	Pathogenic (0.96)	COSV58803602	Lung	(Solano et al., 2017)	10.18632/oncotarget.10814.
BRCA1	17	AB0071W	30	Argentina	NA	rs28897696	c.5123C>A	p.Ala1708Glu	p.A1708E	Missense	Not calculated	Pathogenic	Pathogenic (0.96)	COSV58803602	Lung	(Solano et al., 2017)	10.18632/oncotarget.10814.
BRCA1	17	AB0545	30	Argentina	NA	rs28897696	c.5123C>A	p.Ala1708Glu	p.A1708E	Missense	Not calculated	Pathogenic	Pathogenic (0.96)	COSV58803602	Lung	(Solano et al., 2017)	10.18632/oncotarget.10814.
BRCA1	17	32531	34	Colombia	NA	rs28897696	c.5123C>A/5242C>A	p.A1708E	p.A1708E	Missense	Not calculated	Pathogenic	Pathogenic (0.96)	COSV58803602	Lung	(Hernández et al., 2014)	10.1186/1897-4287-12-11
BRCA1	17	SM-69	33	Brazil	NA	rs28897696	c.5123C>A/5242C>A	p.A1708E	p.A1708E	Missense	Not calculated	Pathogenic	Pathogenic (0.96)	COSV58803602	Lung	(Silva et al., 2014)	10.1186/1471-2350-15-55
BRCA1	17	5	32	Colombia	NA	rs28897696	c.5123C>A/5242C>A	p.A1708E	p.A1708E	Missense	Not calculated	Pathogenic	Pathogenic (0.96)	COSV58803602	Lung	(Torres et al., 2007)	10.1007/s10549-006-9370-1
BRCA1	17	13	32	Colombia	NA	rs28897696	c.5123C>A/5242C>A	p.A1708E	p.A1708E	Missense	Not calculated	Pathogenic	Pathogenic (0.96)	COSV58803602	Lung	(Torres et al., 2007)	10.1007/s10549-006-9370-1
BRCA1	17	53	42	Colombia	NA	rs28897696	c.5123C>A/5242C>A	p.A1708E	p.A1708E	Missense	Not calculated	Pathogenic	Pathogenic (0.96)	COSV58803602	Lung	(Torres et al., 2007)	10.1007/s10549-006-9370-1
BRCA1	17	51505	31	Peru	NA	rs387906563	c.815_824dupAGCCATGTGG/c.815_824dup10	p.T276Afs*14	p.T276Afs*14	Duplication	Not calculated	Pathogenic	Not reported	NA	NA	(Abugattas et al., 2015)	10.1111/cge.12505
BRCA1	17	Fam 17	46	Peru	NA	rs387906563	c.815_824dupAGCCATGTGG/c.815_824dup10	p.T276Afs*14	p.T276Afs*14	Frameshift	Not calculated	Pathogenic	Not reported	NA	NA	(Buleje et al., 2017)	10.1002/mgg3.301
BRCA1	17		23	Brazil	NA	rs397507247	c.5266dupC	p.Gln1756Profs	p.Q1756Pfs	Frameshift	Not calculated	Pathogenic	Pathogenicity not defined	COSV58792389	Breast	(Alemar et al., 2017)	10.1371/journal.pone.0187630
BRCA1	17		26	Brazil	NA	rs397507247	c.5266dupC	p.Gln1756Profs	p.Q1756Pfs	Frameshift	Not calculated	Pathogenic	Pathogenicity not defined	COSV58792389	Breast	(Alemar et al., 2017)	10.1371/journal.pone.0187630
BRCA1	17		29	Brazil	NA	rs397507247	c.5266dupC	p.Gln1756Profs	p.Q1756Pfs	Frameshift	Not calculated	Pathogenic	Pathogenicity not defined	COSV58792389	Breast	(Alemar et al., 2017)	10.1371/journal.pone.0187630
BRCA1	17		30	Brazil	NA	rs397507247	c.5266dupC	p.Gln1756Profs	p.Q1756Pfs	Frameshift	Not calculated	Pathogenic	Pathogenicity not defined	COSV58792389	Breast	(Alemar et al., 2017)	10.1371/journal.pone.0187630
BRCA1	17		36	Brazil	NA	rs397507247	c.5266dupC	p.Gln1756Profs	p.Q1756Pfs	Frameshift	Not calculated	Pathogenic	Pathogenicity not defined	COSV58792389	Breast	(Alemar et al., 2017)	10.1371/journal.pone.0187630
BRCA1	17		42	Brazil	NA	rs397507247	c.5266dupC	p.Gln1756Profs	p.Q1756Pfs	Frameshift	Not calculated	Pathogenic	Pathogenicity not defined	COSV58792389	Breast	(Alemar et al., 2017)	10.1371/journal.pone.0187630
BRCA1	17		47	Brazil	NA	rs397507247	c.5266dupC	p.Gln1756Profs	p.Q1756Pfs	Frameshift	Not calculated	Pathogenic	Pathogenicity not defined	COSV58792389	Breast	(Alemar et al., 2017)	10.1371/journal.pone.0187630
BRCA1	17	MP006	43	Brazil	NA	rs397507247	c.5266dupC	p.Gln1756ProfsTer74	p.Q1756Pfs*74	Frameshift	Not calculated	Pathogenic	Not reported	NA	NA	(Cipriano et al., 2018)	10.1007/s12282-018-00938-z
BRCA1	17	1-RJ	33	Brazil	NA	rs397507247	c.5266dupC	p.Gln1756Profs*74	p.Q1756Pfs*74	Frameshift	Not calculated	Pathogenic	Not reported	NA	NA	(Ewald et al., 2011)	10.1186/1897-4287-9-12
BRCA1	17	6-RJ	33	Brazil	NA	rs397507247	c.5266dupC	p.Gln1756Profs*74	p.Q1756Pfs*74	Frameshift	Not calculated	Pathogenic	Not reported	NA	NA	(Ewald et al., 2011)	10.1186/1897-4287-9-12
BRCA1	17	7-RS	35	Brazil	NA	rs397507247	c.5266dupC	p.Gln1756Profs*74	p.Q1756Pfs*74	Frameshift	Not calculated	Pathogenic	Not reported	NA	NA	(Ewald et al., 2011)	10.1186/1897-4287-9-12
BRCA1	17	4-RJ	45	Brazil	NA	rs397507247	c.5266dupC	p.Gln1756Profs*74	p.Q1756Pfs*74	Frameshift	Not calculated	Pathogenic	Not reported	NA	NA	(Ewald et al., 2011)	10.1186/1897-4287-9-12
BRCA1	17	5-RJ	46	Brazil	NA	rs397507247	c.5266dupC	p.Gln1756Profs*74	p.Q1756Pfs*74	Frameshift	Not calculated	Pathogenic	Not reported	NA	NA	(Ewald et al., 2011)	10.1186/1897-4287-9-12
BRCA1	17		36	Brazil	NA	rs397507247	c.5266dupC	p.Gln1756Profs*74	p.Q1756Pfs*74	Frameshift	Not calculated	Pathogenic	Not reported	NA	NA	(Fernandes et al., 2016)	10.18632/oncotarget.12610
BRCA1	17	MO-07	34	Brazil	NA	rs397507247	c.5266dupC	p.Gln1756Profs*74	p.Q1756Pfs*74	Frameshift	Not calculated	Pathogenic	Not reported	NA	NA	(Silva et al., 2014)	10.1186/1471-2350-15-55
BRCA1	17	MO-09	42	Brazil	NA	rs397507247	c.5266dupC	p.Gln1756Profs*74	p.Q1756Pfs*74	Frameshift	Not calculated	Pathogenic	Not reported	NA	NA	(Silva et al., 2014)	10.1186/1471-2350-15-55
BRCA1	17	MO-45	48	Brazil	NA	rs397507247	c.5266dupC	p.Gln1756Profs*74	p.Q1756Pfs*74	Frameshift	Not calculated	Pathogenic	Not reported	NA	NA	(Silva et al., 2014)	10.1186/1471-2350-15-55
BRCA1	17	AB0578	18	Argentina	NA	rs397507247	c.5266dupC	p.Gln1756Profs*74	p.Q1756Pfs*74	Frameshift	Not calculated	Pathogenic	Not reported	NA	NA	(Solano et al., 2017)	10.18632/oncotarget.10814.
BRCA1	17	AB0386	28	Argentina	NA	rs397507247	c.5266dupC	p.Gln1756Profs*74	p.Q1756Pfs*74	Frameshift	Not calculated	Pathogenic	Not reported	NA	NA	(Solano et al., 2017)	10.18632/oncotarget.10814.
BRCA1	17	AB0038A	37	Argentina	NA	rs397507247	c.5266dupC	p.Gln1756Profs*74	p.Q1756Pfs*74	Frameshift	Not calculated	Pathogenic	Not reported	NA	NA	(Solano et al., 2017)	10.18632/oncotarget.10814.
BRCA1	17	AB0097	38	Argentina	NA	rs397507247	c.5266dupC	p.Gln1756Profs*74	p.Q1756Pfs*74	Frameshift	Not calculated	Pathogenic	Not reported	NA	NA	(Solano et al., 2017)	10.18632/oncotarget.10814.
BRCA1	17	AB0396	39	Argentina	NA	rs397507247	c.5266dupC	p.Gln1756Profs*74	p.Q1756Pfs*74	Frameshift	Not calculated	Pathogenic	Not reported	NA	NA	(Solano et al., 2017)	10.18632/oncotarget.10814.
BRCA1	17	AB0042F	41	Argentina	NA	rs397507247	c.5266dupC	p.Gln1756Profs*74	p.Q1756Pfs*74	Frameshift	Not calculated	Pathogenic	Not reported	NA	NA	(Solano et al., 2017)	10.18632/oncotarget.10814.
BRCA1	17	AB0082K	41	Argentina	NA	rs397507247	c.5266dupC	p.Gln1756Profs*74	p.Q1756Pfs*74	Frameshift	Not calculated	Pathogenic	Not reported	NA	NA	(Solano et al., 2017)	10.18632/oncotarget.10814.
BRCA1	17	AB0151	42	Argentina	NA	rs397507247	c.5266dupC	p.Gln1756Profs*74	p.Q1756Pfs*74	Frameshift	Not calculated	Pathogenic	Not reported	NA	NA	(Solano et al., 2017)	10.18632/oncotarget.10814.
BRCA1	17	AB0003F	43	Argentina	NA	rs397507247	c.5266dupC	p.Gln1756Profs*74	p.Q1756Pfs*74	Frameshift	Not calculated	Pathogenic	Not reported	NA	NA	(Solano et al., 2017)	10.18632/oncotarget.10814.
BRCA1	17	AB0055	49	Argentina	NA	rs397507247	c.5266dupC	p.Gln1756Profs*74	p.Q1756Pfs*74	Frameshift	Not calculated	Pathogenic	Not reported	NA	NA	(Solano et al., 2017)	10.18632/oncotarget.10814.
BRCA1	17	15	38	Uruguay	NA	rs397507781	c.5355dupT/5583insT	p.Ser1786Terfs	p.S1786fs*	Frameshift	Not calculated	Pathogenic	Not reported	NA	NA	(Delgado et al., 2011)	10.1007/s10549-010-1320-2
BRCA1	17	F21	47	Chile	NA	rs397509135	c.4066_4069delCAAG/4185del4	p.Gln1356Lysfs	p.Q1356Kfs	Frameshift	Not calculated	Pathogenic	Not reported	NA	NA	(Jara et al., 2004)	http://dx.doi.org/10.4067/S0716-97602004000300011
BRCA1	17	AB0586	35	Argentina	NA	rs397509151	c.4201C>T	p.Gln1401Ter	p.Q1401*	Nonsense	Not calculated	Pathogenic	Not reported	NA	NA	(Solano et al., 2017)	10.18632/oncotarget.10814.
BRCA1	17		39	Brazil	NA	rs397509213	c.4987-3C>G	NA	NA	Splice site	Not calculated	Conflicting interpretations	Not reported	NA	NA	(Alemar et al., 2017)	10.1371/journal.pone.0187630
BRCA1	17		47	Argentina	NA	rs397509284	c.5445G>A	p.Trp1815Ter	p.W1815*	Missense	Not calculated	Pathogenic	Not reported	NA	NA	(Solano et al., 2018)	10.3389/fonc.2018.00323
BRCA1	17	V3053	38	Mexico	NA	rs41293455	c.4327C>T	p.Arg1443Ter	p.R1443*	Nonsense	Not calculated	Pathogenic	Neutral (0.25)	COSV58787462	Breast, Endometrium and Salivary gland	(Torres-Mejia et al., 2015)	10.1158/1055-9965.EPI-13-0980
BRCA1	17	AB0170	40	Argentina	NA	rs41293455	c.4327C>T	p.Arg1443Ter	p.R1443*	Nonsense	Not calculated	Pathogenic	Neutral (0.25)	COSV58787462	Breast, Endometrium and Salivary gland	(Solano et al., 2017)	10.18632/oncotarget.10814.
BRCA1	17	AB0188	40	Argentina	NA	rs41293455	c.4327C>T	p.Arg1443Ter	p.R1443*	Nonsense	Not calculated	Pathogenic	Neutral (0.25)	COSV58787462	Breast, Endometrium and Salivary gland	(Solano et al., 2017)	10.18632/oncotarget.10814.
BRCA1	17		38	Brazil	NA	rs41293459	c.5096G>A	p.Arg1699Gln	p.R1699Q	Missense	Not calculated	Pathogenic	Not reported	NA	NA	(Alemar et al., 2017)	10.1371/journal.pone.0187630
BRCA1	17	12	42	Mexico	NA	rs55639854	c.4031A>G	p.D1344G	p.D1344G	Missense	Not calculated	Conflicting interpretations	Not reported	NA	NA	(Vaca-Paniagua et al., 2012)	10.1371/journal.pone.0037432
BRCA1	17		28	Brazil	NA	rs55770810	c.5095C>T	p.Arg1699Trp	p.R1699Q	Missense	Not calculated	Pathogenic	Not reported	NA	NA	(Alemar et al., 2017)	10.1371/journal.pone.0187630
BRCA1	17		34	Brazil	NA	rs587776485	c.273_274delTG	p.Ala92Phefs	p.A92Ffs	Deletion	Not calculated	Pathogenic	Not reported	NA	NA	(Alemar et al., 2017)	10.1371/journal.pone.0187630
BRCA1	17		39	Brazil	NA	rs62625307	c.3598C>T	p.Gln1200Ter	p.Q1200*	Nonsense	Not calculated	Pathogenic	Not reported	NA	NA	(Alemar et al., 2017)	10.1371/journal.pone.0187630
BRCA1	17	M2273	39	Mexico	NA	rs62625307	c.3598C>T	p.Q1200X	p.Q1200X	Nonsense	Not calculated	Pathogenic	Not reported	NA	NA	(Torres-Mejia et al., 2015)	10.1158/1055-9965.EPI-13-0980
BRCA1	17	AB0008	25	Argentina	NA	rs62625308	c.3607C>T	p.Arg1203Ter	p.R1203*	Nonsense	Not calculated	Pathogenic	Neutral (0.24)	COSV99066407	Breast	(Solano et al., 2017)	10.18632/oncotarget.10814.
BRCA1	17	AB0028X	33	Argentina	NA	rs80356832	c.2568T>G	p.Tyr856Ter	p.Y856*	Nonsense	Not calculated	Pathogenic	Not reported	NA	NA	(Solano et al., 2017)	10.18632/oncotarget.10814.
BRCA1	17		37	Brazil	NA	rs80356893	c.1612C>T	p.Gln538Ter	p.Q538*	Nonsense	Not calculated	Pathogenic	Not reported	NA	NA	(Alemar et al., 2017)	10.1371/journal.pone.0187630
BRCA1	17		29	Brazil	NA	rs80356898	c.1687C>T	p.Gln563Ter	p.Q563*	Nonsense	Not calculated	Pathogenic	Not reported	NA	NA	(Fernandes et al., 2016)	10.18632/oncotarget.12610
BRCA1	17		44	Brazil	NA	rs80356898	c.1687C>T	p.Gln563Ter	p.Q563*	Nonsense	Not calculated	Pathogenic	Pathogenic (0.87)	COSV58784209	Biliary tract	(Alemar et al., 2017)	10.1371/journal.pone.0187630
BRCA1	17	AB0340	49	Argentina	NA	rs80356898	c.1687C>T	p.Gln563Ter	p.Q563*	Nonsense	Not calculated	Pathogenic	Not reported	NA	NA	(Solano et al., 2017)	10.18632/oncotarget.10814.
BRCA1	17	DL0117677	<40	Mexico	NA	rs80356910	c.1703G>A	p.Pro568Leu	P568L	Missense	Not calculated	Uncertain significance	Not reported	NA	NA	(Gomez-Flores-Ramos et al., 2020)	10.20944/preprints202008.0718.v1
BRCA1	17		45	Brazil	NA	rs80356962	c.5444G>A	p.Trp1815Ter	p.W1815*	Nonsense	Not calculated	Pathogenic	Pathogenic (0.89)	COSV58788041	Breast	(Fernandes et al., 2016)	10.18632/oncotarget.12610
BRCA1	17	MO-31	38	Brazil	NA	rs80356962	c.5444G>A/5563G>A	p.W1815X	p.W1815X	Nonsense	Not calculated	Pathogenic	Not reported	NA	NA	(Silva et al., 2014)	10.1186/1471-2350-15-55
BRCA1	17	AB0232	43	Argentina	NA	rs80356978	c.2722G>T	p.Glu908Ter	p.E908*	Nonsense	Not calculated	Pathogenic	Not reported	NA	NA	(Solano et al., 2017)	10.18632/oncotarget.10814.
BRCA1	17	AB0065X	42	Argentina	NA	rs80356991	c.427G>T	p.Glu143Ter	p.E143*	Truncating	Not calculated	Pathogenic	Not reported	NA	NA	(Solano et al., 2017)	10.18632/oncotarget.10814.
BRCA1	17	AB46	33	Argentina	NA	rs80356991	c.427G>T	p.Glu143Ter	p.E143*	Truncating	Not calculated	Pathogenic	Not reported	NA	NA	(Solano et al., 2012)	10.1186/2193-1801-1-20
BRCA1	17	AB0046	43	Argentina	NA	rs80356991	c.427G>T	p.Glu143Ter	p.E143*	Truncating	Not calculated	Pathogenic	Not reported	NA	NA	(Solano et al., 2017)	10.18632/oncotarget.10814.
BRCA1	17	AB0084D	33	Argentina	NA	rs80357006	c.3257T>G/c.3376T>G	p.L1086X	p.L1086X	Nonsense	Not calculated	Pathogenic	Not reported	NA	NA	(Solano et al., 2017)	10.18632/oncotarget.10814.
BRCA1	17		26	Brazil	NA	rs80357086	c.188T>A	p.Leu63*	p.L63*	Nonsense	Not calculated	Pathogenic	Not reported	NA	NA	(Fernandes et al., 2016)	10.18632/oncotarget.12610
BRCA1	17	62	34	Mexico	NA	rs80357114	2364G>T/c.2245G>T	p.Asp749Tyr	p.D749Y	Missense	Not calculated	Uncertain significance	Not reported	NA	NA	(Ruiz-Flores et al., 2002)	10.1002/humu.9084
BRCA1	17		45	Brazil	NA	rs80357123	c.5251C>T	p.Arg1751Ter	p.R1751*	Nonsense	Not calculated	Pathogenic	Pathogenic (0.77)	COSV58785164	NS, Stomach	(Alemar et al., 2017)	10.1371/journal.pone.0187630
BRCA1	17		23	Brazil	NA	rs80357123	c.5251C>T	p.Arg1751Ter	p.R1751*	Nonsense	Not calculated	Pathogenic	Pathogenic (0.77)	COSV58785164	NS, Stomach	(Fernandes et al., 2016)	10.18632/oncotarget.12610
BRCA1	17		46	Brazil	NA	rs80357136	c.3403C>T	p.Gln1135Ter	p.Q1135*	Nonsense	Not calculated	Pathogenic	Not reported	NA	NA	(Lourenço et al., 2004)	https://doi.org/10.1590/S1415-47572004000400006
BRCA1	17	CM24	49	Costa Rica	NA	rs80357136	c.3403C>T	p.Q1135X	p.Q1135X	Deletion	Not calculated	Pathogenic	Not reported	NA	NA	(Gutiérrez et al., 2012)	10.1111/j.1399-0004.2011.01774.x
BRCA1	17		31	Brazil	NA	rs80357145	c.3239T>A/c.3113A>C	p.Leu1080Ter	p.L1080*	Nonsense	Not calculated	Pathogenic	Not reported	NA	NA	(Fernandes et al., 2016)	10.18632/oncotarget.12610
BRCA1	17	AB0200	49	Argentina	NA	rs80357162	c.3689T>G	p.Leu1230Ter	p.L1230*	Nonsense	Not calculated	Pathogenic	Not reported	NA	NA	(Solano et al., 2017)	10.18632/oncotarget.10814.
BRCA1	17		24	Brazil	NA	rs80357260	c.4183C>T	p.Gln1395Ter	p.Q1395*	Nonsense	Not calculated	Pathogenic	Pathogenic (0.97)	COSV99066409	Breast	(Alemar et al., 2017)	10.1371/journal.pone.0187630
BRCA1	17		43	Brazil	NA	rs80357260	c.4183C>T	p.Gln1395Ter	p.Q1395*	Nonsense	Not calculated	Pathogenic	Pathogenic (0.97)	COSV99066409	Breast	(Alemar et al., 2017)	10.1371/journal.pone.0187630
BRCA1	17	AB0550	30	Argentina	NA	rs80357260	c.4183C>T	p.Gln1395Ter	p.Q1395*	Nonsense	Not calculated	Pathogenic	Pathogenic (0.97)	COSV99066409	Breast	(Solano et al., 2017)	10.18632/oncotarget.10814.
BRCA1	17	AB64	43	Argentina	NA	rs80357382	c.211A>G	p.Arg71Gly	p.R71G	Missense	Not calculated	Pathogenic	Pathogenic (0.96)	COSV58798129	Thyroid	(Solano et al., 2012)	10.1186/2193-1801-1-20
BRCA1	17	AB0540	31	Argentina	NA	rs80357382	c.211A>G	p.Arg71Gly	p.R71G	Missense	Not calculated	Pathogenic	Pathogenic (0.96)	COSV58798129	Thyroid	(Solano et al., 2017)	10.18632/oncotarget.10814.
BRCA1	17	AB0532	33	Argentina	NA	rs80357382	c.211A>G	p.Arg71Gly	p.R71G	Missense	Not calculated	Pathogenic	Pathogenic (0.96)	COSV58798129	Thyroid	(Solano et al., 2017)	10.18632/oncotarget.10814.
BRCA1	17	AB0064	43	Argentina	NA	rs80357382	c.211A>G	p.Arg71Gly	p.R71G	Missense	Not calculated	Pathogenic	Pathogenic (0.96)	COSV58798129	Thyroid	(Solano et al., 2017)	10.18632/oncotarget.10814.
BRCA1	17	AB0474	44	Argentina	NA	rs80357382	c.211A>G	p.Arg71Gly	p.R71G	Missense	Not calculated	Pathogenic	Pathogenic (0.96)	COSV58798129	Thyroid	(Solano et al., 2017)	10.18632/oncotarget.10814.
BRCA1	17	AB0459	46	Argentina	NA	rs80357382	c.211A>G	p.Arg71Gly	p.R71G	Missense	Not calculated	Pathogenic	Pathogenic (0.96)	COSV58798129	Thyroid	(Solano et al., 2017)	10.18632/oncotarget.10814.
BRCA1	17	AB0602	48	Argentina	NA	rs80357382	c.211A>G	p.Arg71Gly	p.R71G	Missense	Not calculated	Pathogenic	Pathogenic (0.96)	COSV58798129	Thyroid	(Solano et al., 2017)	10.18632/oncotarget.10814.
BRCA1	17		36,6	Uruguay	NA	rs80357382	c.211A>G	p.Arg71Gly	p.R71G	Missense	Not calculated	Pathogenic	Pathogenic (0.96)	COSV58798129	Thyroid	(Valle et al., 2017)	http://revista.rmu.org.uy/ojsrmu311/index.php/rmu/article/view/112
BRCA1	17		39,3	Uruguay	NA	rs80357382	c.211A>G	p.Arg71Gly	p.R71G	Missense	Not calculated	Pathogenic	Pathogenic (0.96)	COSV58798129	Thyroid	(Valle et al., 2017)	http://revista.rmu.org.uy/ojsrmu311/index.php/rmu/article/view/112
BRCA1	17		40,8	Uruguay	NA	rs80357382	c.211A>G	p.Arg71Gly	p.R71G	Missense	Not calculated	Pathogenic	Pathogenic (0.96)	COSV58798129	Thyroid	(Valle et al., 2017)	http://revista.rmu.org.uy/ojsrmu311/index.php/rmu/article/view/112
BRCA1	17	CM025	35	Venezuela	NA	rs80357389	c.4484G>T/4603G>T	p.Arg1495Met	p.R1495M	Missense	Not calculated	Pathogenic	Not reported	NA	NA	(Lara et al., 2012)	10.4067/S0716-97602012000200003
BRCA1	17	51663	47	Peru	NA	rs80357522	c.1961delA/c.1961_1962delA/2080delA	p.Lys654Serfs	p.K654Sfs	Deletion	Not calculated	Pathogenic	Not reported	NA	NA	(Abugattas et al., 2015)	10.1111/cge.12505
BRCA1	17	51788	49	Peru	NA	rs80357522	c.1961delA/c.1961_1962delA/2080delA	p.Lys654Serfs	p.K654Sfs	Deletion	Not calculated	Pathogenic	Not reported	NA	NA	(Abugattas et al., 2015)	10.1111/cge.12505
BRCA1	17		34	Brazil	NA	rs80357522	c.1962dupG	p.Tyr655Valfs*18	p.Y655Vfs*18	Frameshift	Not calculated	Not reported in Clinvar	Not reported	NA	NA	(Fernandes et al., 2016)	10.18632/oncotarget.12610
BRCA1	17	D2142	38	Mexico	NA	rs80357524	c.2433delC/2552delC	p.Lys812Argfs	p.K812Rfs	Deletion	Not calculated	Pathogenic	Not reported	NA	NA	(Torres-Mejia et al., 2015)	10.1158/1055-9965.EPI-13-0980
BRCA1	17	AB0001X	34	Argentina	NA	rs80357542	c.4625_4626delCT	p.Ser1542Trpfs*31	p.S1542Wfs*31	Deletion	Not calculated	Pathogenic	Not reported	NA	NA	(Solano et al., 2017)	10.18632/oncotarget.10814.
BRCA1	17	D2309	41	Mexico	NA	rs80357569	c.1011dupA/c.1016-1017insA	p.Val340Glyfs	p.V340Gfs	Duplication	Not calculated	Pathogenic	Pathogenicity not defined	COSV99066400	Ovary and Breast	(Torres-Mejia et al., 2015)	10.1158/1055-9965.EPI-13-0980
BRCA1	17		33	Brazil	NA	rs80357572	c.4165_4166delAG	p.Ser1389Ter	p.S1389*	Frameshift	Not calculated	Pathogenic	Neutral (0.04)	COSV58783806	Meninges, Prostate, Lung, Large intestine and Haematopoietic and lymphoid	(Fernandes et al., 2016)	10.18632/oncotarget.12610
BRCA1	17		40	Brazil	NA	rs80357580	c.5030_5033delCTAA	p.Thr1677Ilefs*2	p.T1677Ifs*2	Frameshift	Not calculated	Pathogenic	Not reported	NA	NA	(Fernandes et al., 2016)	10.18632/oncotarget.12610
BRCA1	17	AB0036X	37	Argentina	NA	rs80357580	c.5030_5033delCTAA	p.Thr1677Ilefs*2	p.T1677Ifs*2	Frameshift	Not calculated	Pathogenic	Not reported	NA	NA	(Solano et al., 2017)	10.18632/oncotarget.10814.
BRCA1	17		36	Brazil	NA	rs80357597	c.1340_1341insG	p.His448Serfs	p.H448Sfs	Insertion	Not calculated	Pathogenic	Not reported	NA	NA	(Alemar et al., 2017)	10.1371/journal.pone.0187630
BRCA1	17	18	47	Colombia	NA	rs80357600	c.1674delA/1793delA	p.Gly559Valfs	p.G559Vfs	Deletion	Not calculated	Pathogenic	Not reported	NA	NA	(Cock-Rada et al., 2018)	10.1007/s10689-017-0004-z
BRCA1	17	295	38	Colombia	NA	rs80357600	c.1674delA/1793delA	p.Gly559fs	p.G559fs	Deletion	Not calculated	Pathogenic	NOt reported	NA	NA	(Torres et al., 2017)	10.1038/s41598-017-05056-y
BRCA1	17		29	Brazil	NA	rs80357605	c.2727_2730delTCAA	p.Asn909Lysfs	p.N909Kfs	Deletion	Not calculated	Pathogenic	Not reported	NA	NA	(Alemar et al., 2017)	10.1371/journal.pone.0187630
BRCA1	17		28	Brazil	NA	rs80357635	c.3228_3229delAG/3347delAG	p.Gly1077Alafs*8	p.G1077Afs*8	Deletion	Not calculated	Pathogenic	Not reported	NA	NA	(Alemar et al., 2017)	10.1371/journal.pone.0187630
BRCA1	17	26257	32	Brazil	NA	rs80357635	c.3228_3229delAG/3347delAG	p.Gly1077Alafs	p.G1077Afs	Deletion	Not calculated	Pathogenic	Not reported	NA	NA	(Gomes et al., 2007)	10.1007/s10549-006-9378-6
BRCA1	17		32	Brazil	NA	rs80357678	c.3916_3917delTT	p.Leu1306Aspfs*23	p.L1306Dfs*23	Frameshift	Not calculated	Pathogenic	Not reported	NA	NA	(Fernandes et al., 2016)	10.18632/oncotarget.12610
BRCA1	17		39	Brazil	NA	rs80357701	c.3331_3334delCAAG	p.Q1111Nfs*5	p.Q1111Nfs*5	Frameshift	Not calculated	Pathogenic	Not reported	NA	NA	(Fernandes et al., 2016)	10.18632/oncotarget.12610
BRCA1	17	21.1	32	Brazil	NA	rs80357701	c.3331_3334delCAAG/3450del4	p.Gln1111Asnfs	p.Q1111Nfs	Deletion	Not calculated	Pathogenic	Not reported	NA	NA	(Felix et al., 2014)	10.1038/hgv.2014.12
BRCA1	17	13.1	47	Brazil	NA	rs80357701	c.3331_3334delCAAG/3450del4	p.Gln1111Asnfs	p.Q1111Nfs	Deletion	Not calculated	Pathogenic	Not reported	NA	NA	(Felix et al., 2014)	10.1038/hgv.2014.12
BRCA1	17	32562	32	Colombia	NA	rs80357701	c.3331_3334delCAAG/3450delCAAG/3450del4/3450_3453delCAAG	p.Gln1111Asnfs	p.Q1111Nfs	Frameshift	Not calculated	Pathogenic	Not reported	NA	NA	(Hernández et al., 2014)	10.1186/1897-4287-12-11
BRCA1	17		48	Brazil	NA	rs80357701	c.3331_3334delCAAG/3450delCAAG/3450del4/3450_3453delCAAG	p.Gln1111Asnfs	p.Q1111Nfs	Frameshift	Not calculated	Pathogenic	Not reported	NA	NA	(Lourenço et al., 2004)	https://doi.org/10.1590/S1415-47572004000400006
BRCA1	17	25	37	Colombia	NA	rs80357701	c.3331_3334delCAAG/3450delCAAG/3450del4/3450_3453delCAAG	p.Gln1111Asnfs	p.Q1111Nfs	Frameshift	Not calculated	Pathogenic	Not reported	NA	NA	(Torres et al., 2007)	10.1007/s10549-006-9370-1
BRCA1	17	47	41	Colombia	NA	rs80357701	c.3331_3334delCAAG/3450delCAAG/3450del4/3450_3453delCAAG	p.Gln1111Asnfs	p.Q1111Nfs	Frameshift	Not calculated	Pathogenic	Not reported	NA	NA	(Torres et al., 2007)	10.1007/s10549-006-9370-1
BRCA1	17	15	45	Colombia	NA	rs80357701	c.3331_3334delCAAG/3450delCAAG/3450del4/3450_3453delCAAG	p.Gln1111Asnfs	p.Q1111Nfs	Frameshift	Not calculated	Pathogenic	Not reported	NA	NA	(Torres et al., 2007)	10.1007/s10549-006-9370-1
BRCA1	17	17	48	Colombia	NA	rs80357701	c.3331_3334delCAAG/3450delCAAG/3450del4/3450_3453delCAAG	p.Gln1111Asnfs	p.Q1111Nfs	Frameshift	Not calculated	Pathogenic	Not reported	NA	NA	(Torres et al., 2007)	10.1007/s10549-006-9370-1
BRCA1	17		35	Brazil	NA	rs80357706	c.2405_2406delTG/2524delTG	p.Val802Glufs*7	p.V802Efs*7	Frameshift	Not calculated	Pathogenic	Not reported	NA	NA	(Fernandes et al., 2016)	10.18632/oncotarget.12610
BRCA1	17	MO-26	40	Brazil	NA	rs80357714	c.1380dupA/1499insA	p.Phe461Ilefs*19	p.F461Ifs*19	Frameshift	Not calculated	Pathogenic	Not reported	NA	NA	(Silva et al., 2014)	10.1186/1471-2350-15-55
BRCA1	17	AB0036	46	Argentina	NA	rs80357724	c.787+11_787+12delTT/c.798_799delTT	p.Ser267Lysfs*19	p.S267Kfs*19	Deletion	Not calculated	Pathogenic	Not reported	NA	NA	(Solano et al., 2017)	10.18632/oncotarget.10814.
BRCA1	17		26,5	Uruguay	NA	rs80357724	c.798_799delTT/c.787+11_787+12delTT	p.Ser267Lysfs*19	p.S267Kfs*19	Deletion	Not calculated	Pathogenic	Not reported	NA	NA	(Valle et al., 2017)	http://revista.rmu.org.uy/ojsrmu311/index.php/rmu/article/view/112
BRCA1	17		42,6	Uruguay	NA	rs80357724	c.798_799delTT/c.787+11_787+12delTT	p.Ser267Lysfs*19	p.S267Kfs*19	Deletion	Not calculated	Pathogenic	Not reported	NA	NA	(Valle et al., 2017)	http://revista.rmu.org.uy/ojsrmu311/index.php/rmu/article/view/112
BRCA1	17	AB21	33	Argentina	NA	rs80357729	c.3627dupA/c.3627insA	p.Glu1210Argfs*9	p.E1210Rfs*9	Truncating	Not calculated	Pathogenic	Not reported	NA	NA	(Solano et al., 2012)	10.1186/2193-1801-1-20
BRCA1	17	AB0021	33	Argentina	NA	rs80357729	c.3627dupA/c.3627insA	p.Glu1210Argfs*9	p.E1210Rfs*9	Insertion	Not calculated	Pathogenic	Not reported	NA	NA	(Solano et al., 2017)	10.18632/oncotarget.10814.
BRCA1	17	SM-01	39	Brazil	NA	rs80357760	c.5084_5085delTT/5203delTT	p.Phe1695Cysfs*3	p.F1695Cfs*3	Frameshift	Not calculated	Pathogenic	Not reported	NA	NA	(Silva et al., 2014)	10.1186/1471-2350-15-55
BRCA1	17	M2255	34	Mexico	NA	rs80357780	c.2296_2297delAG/2415delAG	p.Ser766Terfs	p.S766*	Deletion	Not calculated	Pathogenic	Not reported	NA	NA	(Torres-Mejia et al., 2015)	10.1158/1055-9965.EPI-13-0980
BRCA1	17	AB0082	34	Argentina	NA	rs80357783	c.66dupA	p.Glu23Argfs*18	p.E23Rfs*18	Frameshift	Not calculated	Pathogenic	Not reported	NA	NA	(Solano et al., 2017)	10.18632/oncotarget.10814.
BRCA1	17	AB0042C	36	Argentina	NA	rs80357783	c.66dupA	p.Glu23Argfs*18	p.E23Rfs*18	Frameshift	Not calculated	Pathogenic	Not reported	NA	NA	(Solano et al., 2017)	10.18632/oncotarget.10814.
BRCA1	17	AB0296	37	Argentina	NA	rs80357794	c.1297delG	p.Ala433Profs	p.A433Pfs	Deletion	Not calculated	Pathogenic	Not reported	NA	NA	(Solano et al., 2017)	10.18632/oncotarget.10814.
BRCA1	17	AB0150	25	Argentina	NA	rs80357796	c.1067delA	p.Gln356Argfs	p.Q356Rfs	Deletion	Not calculated	Pathogenic	Not reported	NA	NA	(Solano et al., 2017)	10.18632/oncotarget.10814.
BRCA1	17		35	Brazil	NA	rs80357848	c.3764dupA	p.Asn1255Lysfs*11	p.N1255Kfs*11	Frameshift	Not calculated	Pathogenic	Not reported	NA	NA	(Fernandes et al., 2016)	10.18632/oncotarget.12610
BRCA1	17	32-RS	35	Brazil	NA	rs80357867	c.1865_1868delGAAA/c.5177_5180delGAAA/5296del4	p.Arg1726Lysfs	p.R1726Kfs	Frameshift	Not calculated	Pathogenic	NA	COSV58796761	Breast	(Ewald et al., 2016)	10.1590/1678-4685-GMB-2014-0350
BRCA1	17	36-RS	46	Brazil	NA	rs80357867	c.1865_1868delGAAA/c.5177_5180delGAAA/5296del4	p.Arg1726Lysfs	p.R1726Kfs	Frameshift	Not calculated	Pathogenic	NA	COSV58796761	Breast	(Ewald et al., 2016)	10.1590/1678-4685-GMB-2014-0350
BRCA1	17		39	Brazil	NA	rs80357867	c.5177_5180delGAAA	p.Arg1726Lysfs	p.R1726Kfs	NA	Not calculated	Pathogenic	Not reported	NA	NA	(Alemar et al., 2017)	10.1371/journal.pone.0187630
BRCA1	17		32	Brazil	NA	rs80357867	c.5177_5180delGAAA	p.Arg1726Lysfs	p.R1726Kfs	NA	Not calculated	Pathogenic	Not reported	NA	NA	(Alemar et al., 2017)	10.1371/journal.pone.0187630
BRCA1	17		47	Brazil	NA	rs80357867	c.5177_5180delGAAA	p.Arg1726Lysfs	p.R1726Kfs	NA	Not calculated	Pathogenic	Not reported	NA	NA	(Alemar et al., 2017)	10.1371/journal.pone.0187630
BRCA1	17		43	Brazil	NA	rs80357887	c.470_471delCT	p.Ser157Ter	p.S157*	Missense	Not calculated	Pathogenic	Not reported	NA	NA	(Fernandes et al., 2016)	10.18632/oncotarget.12610
BRCA1	17		48	Uruguay	NA	rs80357888	c.1504_1508delTTAAA	p.Leu502Alafs	p.L502Afs	Deletion	Not calculated	Pathogenic	NA	COSV58788471	Ovary	(Valle et al., 2017)	http://revista.rmu.org.uy/ojsrmu311/index.php/rmu/article/view/112
BRCA1	17		28	Brazil	NA	rs80357905	c.4941delC	p.Asn1647Lysfs	p.N1647Kfs	Deletion	Not calculated	Pathogenic	Not reported	NA	NA	(Alemar et al., 2017)	10.1371/journal.pone.0187630
BRCA1	17	E	33	Brazil	NA	rs80357906	c.5266dupC	p.Gln1756Profs	p.Q1756Pfs	Frameshift	Not calculated	Pathogenic	Pathogenicity not defined	COSV58792389	Breast	(da Costa et al., 2008)	10.1016/j.cancergencyto.2008.03.011
BRCA1	17	24579	28	Brazil	NA	rs80357906	c.5266dupC	p.Gln1756Profs	p.Q1756Pfs	Frameshift	Not calculated	Pathogenic	Not reported	COSV58792389	Breast	(Gomes et al., 2007)	10.1007/s10549-006-9378-6
BRCA1	17	26288	37	Brazil	NA	rs80357906	c.5266dupC	p.Gln1756Profs	p.Q1756Pfs	Frameshift	Not calculated	Pathogenic	Not reported	COSV58792389	Breast	(Gomes et al., 2007)	10.1007/s10549-006-9378-6
BRCA1	17	24122	38	Brazil	NA	rs80357906	c.5266dupC	p.Gln1756Profs	p.Q1756Pfs	Frameshift	Not calculated	Pathogenic	Not reported	COSV58792389	Breast	(Gomes et al., 2007)	10.1007/s10549-006-9378-6
BRCA1	17	28844	41	Brazil	NA	rs80357906	c.5266dupC	p.Gln1756Profs	p.Q1756Pfs	Frameshift	Not calculated	Pathogenic	Not reported	COSV58792389	Breast	(Gomes et al., 2007)	10.1007/s10549-006-9378-6
BRCA1	17	24535	46	Brazil	NA	rs80357906	c.5266dupC	p.Gln1756Profs	p.Q1756Pfs	Frameshift	Not calculated	Pathogenic	Not reported	COSV58792389	Breast	(Gomes et al., 2007)	10.1007/s10549-006-9378-6
BRCA1	17		33	Brazil	NA	rs80357906	c.5266dupC	p.Gln1756Profs	p.Q1756Pfs	Frameshift	Not calculated	Pathogenic	NA	COSV58792389	Breast	(Lourenço et al., 2004)	https://doi.org/10.1590/S1415-47572004000400006
BRCA1	17		47	Brazil	NA	rs80357906	c.5266dupC	p.Gln1756Profs	p.Q1756Pfs	Frameshift	Not calculated	Pathogenic	NA	COSV58792389	Breast	(Lourenço et al., 2004)	https://doi.org/10.1590/S1415-47572004000400006
BRCA1	17		47	Brazil	NA	rs80357906	c.5266dupC	p.Gln1756Profs	p.Q1756Pfs	Frameshift	Not calculated	Pathogenic	NA	COSV58792389	Breast	(Lourenço et al., 2004)	https://doi.org/10.1590/S1415-47572004000400006
BRCA1	17	AB40	30	Argentina	NA	rs80357908	c.1510delC	p.Arg504Valfs	p.R504Vfs	Truncating	Not calculated	Pathogenic	Not reported	NA	NA	(Solano et al., 2012)	10.1186/2193-1801-1-20
BRCA1	17	AB0040	32	Argentina	NA	rs80357908	c.1510delC	p.Arg504Valfs	p.R504Vfs	Truncating	Not calculated	Pathogenic	Not reported	NA	NA	(Solano et al., 2017)	10.18632/oncotarget.10814.
BRCA1	17	51758	33	Peru	NA	rs80357914	c.66_67delAG	p.Glu23fs	p.E23fs	Frameshift	Not calculated	Pathogenic	Not reported	NA	NA	(Abugattas et al., 2015)	10.1111/cge.12505
BRCA1	17	51560	34	Peru	NA	rs80357914	c.66_67delAG	p.Glu23fs	p.E23fs	Frameshift	Not calculated	Pathogenic	Not reported	NA	NA	(Abugattas et al., 2015)	10.1111/cge.12505
BRCA1	17	51573	36	Peru	NA	rs80357914	c.66_67delAG	p.Glu23fs	p.E23fs	Frameshift	Not calculated	Pathogenic	Not reported	NA	NA	(Abugattas et al., 2015)	10.1111/cge.12505
BRCA1	17	51789	36	Peru	NA	rs80357914	c.66_67delAG	p.Glu23fs	p.E23fs	Frameshift	Not calculated	Pathogenic	Not reported	NA	NA	(Abugattas et al., 2015)	10.1111/cge.12505
BRCA1	17	51767	46	Peru	NA	rs80357914	c.66_67delAG	p.Glu23fs	p.E23fs	Frameshift	Not calculated	Pathogenic	Not reported	NA	NA	(Abugattas et al., 2015)	10.1111/cge.12505
BRCA1	17	51796	47	Peru	NA	rs80357914	c.66_67delAG	p.Glu23fs	p.E23fs	Frameshift	Not calculated	Pathogenic	Not reported	NA	NA	(Abugattas et al., 2015)	10.1111/cge.12505
BRCA1	17	F4	38	Chile	NA	rs80357914	c.66_67delAG	p.Glu23fs	p.E23fs	Frameshift	Not calculated	Pathogenic	Not reported	NA	NA	(Gonzalez-Hormazabal et al., 2011)	10.1007/s10549-010-1170-y
BRCA1	17	F46	42	Chile	NA	rs80357914	c.66_67delAG	p.Glu23fs	p.E23fs	Frameshift	Not calculated	Pathogenic	Not reported	NA	NA	(Gonzalez-Hormazabal et al., 2011)	10.1007/s10549-010-1170-y
BRCA1	17	F4	38	Chile	NA	rs80357914	c.66_67delAG	p.Glu23fs	p.E23fs	Frameshift	Not calculated	Pathogenic	Not reported	NA	NA	(Jara et al., 2006)	10.1016/j.cancergencyto.2005.08.019
BRCA1	17	F46	42	Chile	NA	rs80357914	c.66_67delAG	p.Glu23fs	p.E23fs	Frameshift	Not calculated	Pathogenic	Not reported	NA	NA	(Jara et al., 2006)	10.1016/j.cancergencyto.2005.08.019
BRCA1	17	AB54	37	Argentina	NA	rs80357914	c.66_67delAG	p.Glu23fs	p.E23fs	Frameshift	Not calculated	Pathogenic	Not reported	NA	NA	(Solano et al., 2012)	10.1186/2193-1801-1-20
BRCA1	17	AB60	40	Argentina	NA	rs80357914	c.66_67delAG	p.Glu23fs	p.E23fs	Frameshift	Not calculated	Pathogenic	Not reported	NA	NA	(Solano et al., 2012)	10.1186/2193-1801-1-20
BRCA1	17	AB76	49	Argentina	NA	rs80357914	c.66_67delAG	p.Glu23fs	p.E23fs	Frameshift	Not calculated	Pathogenic	Not reported	NA	NA	(Solano et al., 2012)	10.1186/2193-1801-1-20
BRCA1	17	AB0029E	30	Argentina	NA	rs80357914	c.66_67delAG	p.Glu23fs	p.E23fs	Frameshift	Not calculated	Pathogenic	Not reported	NA	NA	(Solano et al., 2017)	10.18632/oncotarget.10814.
BRCA1	17	AB0094G	31	Argentina	NA	rs80357914	c.66_67delAG	p.Glu23fs	p.E23fs	Frameshift	Not calculated	Pathogenic	Not reported	NA	NA	(Solano et al., 2017)	10.18632/oncotarget.10814.
BRCA1	17	AB0424	34	Argentina	NA	rs80357914	c.66_67delAG	p.Glu23fs	p.E23fs	Frameshift	Not calculated	Pathogenic	Not reported	NA	NA	(Solano et al., 2017)	10.18632/oncotarget.10814.
BRCA1	17	AB0003J	34	Argentina	NA	rs80357914	c.66_67delAG	p.Glu23fs	p.E23fs	Frameshift	Not calculated	Pathogenic	Not reported	NA	NA	(Solano et al., 2017)	10.18632/oncotarget.10814.
BRCA1	17	AB0041F	37	Argentina	NA	rs80357914	c.66_67delAG	p.Glu23fs	p.E23fs	Frameshift	Not calculated	Pathogenic	Not reported	NA	NA	(Solano et al., 2017)	10.18632/oncotarget.10814.
BRCA1	17	AB0054	37	Argentina	NA	rs80357914	c.66_67delAG	p.Glu23fs	p.E23fs	Frameshift	Not calculated	Pathogenic	Not reported	NA	NA	(Solano et al., 2017)	10.18632/oncotarget.10814.
BRCA1	17	AB0019D	38	Argentina	NA	rs80357914	c.66_67delAG	p.Glu23fs	p.E23fs	Frameshift	Not calculated	Pathogenic	Not reported	NA	NA	(Solano et al., 2017)	10.18632/oncotarget.10814.
BRCA1	17	AB0060	40	Argentina	NA	rs80357914	c.66_67delAG	p.Glu23fs	p.E23fs	Frameshift	Not calculated	Pathogenic	Not reported	NA	NA	(Solano et al., 2017)	10.18632/oncotarget.10814.
BRCA1	17	AB0103S	42	Argentina	NA	rs80357914	c.66_67delAG	p.Glu23fs	p.E23fs	Frameshift	Not calculated	Pathogenic	Not reported	NA	NA	(Solano et al., 2017)	10.18632/oncotarget.10814.
BRCA1	17	AB0004J	43	Argentina	NA	rs80357914	c.66_67delAG	p.Glu23fs	p.E23fs	Frameshift	Not calculated	Pathogenic	Not reported	NA	NA	(Solano et al., 2017)	10.18632/oncotarget.10814.
BRCA1	17	AB0013K	43	Argentina	NA	rs80357914	c.66_67delAG	p.Glu23fs	p.E23fs	Frameshift	Not calculated	Pathogenic	Not reported	NA	NA	(Solano et al., 2017)	10.18632/oncotarget.10814.
BRCA1	17	AB0077	44	Argentina	NA	rs80357914	c.66_67delAG	p.Glu23fs	p.E23fs	Frameshift	Not calculated	Pathogenic	Not reported	NA	NA	(Solano et al., 2017)	10.18632/oncotarget.10814.
BRCA1	17	AB0068	44	Argentina	NA	rs80357914	c.66_67delAG	p.Glu23fs	p.E23fs	Frameshift	Not calculated	Pathogenic	Not reported	NA	NA	(Solano et al., 2017)	10.18632/oncotarget.10814.
BRCA1	17	AB0006I	46	Argentina	NA	rs80357914	c.66_67delAG	p.Glu23fs	p.E23fs	Frameshift	Not calculated	Pathogenic	Not reported	NA	NA	(Solano et al., 2017)	10.18632/oncotarget.10814.
BRCA1	17	AB0080I	48	Argentina	NA	rs80357914	c.66_67delAG	p.Glu23fs	p.E23fs	Frameshift	Not calculated	Pathogenic	Not reported	NA	NA	(Solano et al., 2017)	10.18632/oncotarget.10814.
BRCA1	17	AB0041L	48	Argentina	NA	rs80357914	c.66_67delAG	p.Glu23fs	p.E23fs	Frameshift	Not calculated	Pathogenic	Not reported	NA	NA	(Solano et al., 2017)	10.18632/oncotarget.10814.
BRCA1	17	AB0076	49	Argentina	NA	rs80357914	c.66_67delAG	p.Glu23fs	p.E23fs	Frameshift	Not calculated	Pathogenic	Not reported	NA	NA	(Solano et al., 2017)	10.18632/oncotarget.10814.
BRCA1	17	AB0087S	49	Argentina	NA	rs80357914	c.66_67delAG	p.Glu23fs	p.E23fs	Frameshift	Not calculated	Pathogenic	Not reported	NA	NA	(Solano et al., 2017)	10.18632/oncotarget.10814.
BRCA1	17	AB0507	41	Argentina	NA	rs80357933	c.1892dupT	p.Glu638Asnfs*13	p.E638Nfs*13	Insertion	Not calculated	Pathogenic	Not reported	NA	NA	(Solano et al., 2017)	10.18632/oncotarget.10814.
BRCA1	17	AB0041Y	35	Argentina	NA	rs80357945	c.3358_3359delGT	p.Val1120Terfs	p.V1120*fs	Deletion	Not calculated	Pathogenic	Not reported	NA	NA	(Solano et al., 2017)	10.18632/oncotarget.10814.
BRCA1	17		28	Brazil	NA	rs80357954	c.1088delA	p.Asn363Ilefs*11	p.N363Ifs*11	Deletion	Not calculated	Pathogenic	Not reported	NA	NA	(Alemar et al., 2017)	10.1371/journal.pone.0187630
BRCA1	17		36	Brazil	NA	rs80357954	c.1088delA	p.Asn363Ilefs*11	p.N363Ifs*11	Frameshift	Not calculated	Pathogenic	Not reported	NA	NA	(Fernandes et al., 2016)	10.18632/oncotarget.12610
BRCA1	17		42	Uruguay	NA	rs80358011	c.302-2A>G	NA	NA	Splice site	Not calculated	Pathogenic/Likely pathogenic	Not reported	NA	NA	(Valle et al., 2017)	http://revista.rmu.org.uy/ojsrmu311/index.php/rmu/article/view/112
BRCA1	17		47	Brazil	NA	rs80358027	c.4357+1G>C	IVS13+1G>C	NA	Splice site	Not calculated	Pathogenic/Likely pathogenic	Not reported	NA	NA	(Fernandes et al., 2016)	10.18632/oncotarget.12610
BRCA1	17		38	Brazil	NA	rs80358027	c.4357+1G>T	NA	NA	Splice site	Not calculated	Pathogenic	Not reported	NA	NA	(Alemar et al., 2017)	10.1371/journal.pone.0187630
BRCA1	17		32	Brazil	NA	rs80358044	c.4675+1G>A	IVS15+1G>A	NA	Splice site	Not calculated	Pathogenic	Not reported	NA	NA	(Alemar et al., 2017)	10.1371/journal.pone.0187630
BRCA1	17	AB0096C	35	Argentina	NA	rs80358048	c.5468-1G>A	IVS23-1G>A	NA	Polymorphism	Not calculated	Pathogenic	Not reported	NA	NA	(Solano et al., 2017)	10.18632/oncotarget.10814.
BRCA1	17	Fam 12	45	Peru	NA	rs80358116	c.302-1G>C	IVS6-1G>C	NA	Splice site change	Not calculated	Pathogenic	Pathogenic (0.95)	COSV100523248	Endometrium, breast	(Buleje et al., 2017)	10.1002/mgg3.301
BRCA1	17		36	Brazil	NA	rs80358344	c.5062_5064delGTT	p.Val1688del	p.V1688del	Deletion	Not calculated	Pathogenic	Not reported	NA	NA	(Alemar et al., 2017)	10.1371/journal.pone.0187630
BRCA1	17		36	Brazil	NA	rs80358344	c.5062_5064delGTT	p.Val1688del	p.V1688del	Deletion	Not calculated	Pathogenic	Not reported	NA	NA	(Alemar et al., 2017)	10.1371/journal.pone.0187630
BRCA1	17		45	Brazil	NA	rs80358344	c.5062_5064delGTT	p.Val1688del	p.V1688del	Deletion	Not calculated	Pathogenic	Not reported	NA	NA	(Alemar et al., 2017)	10.1371/journal.pone.0187630
BRCA1	17		29	Brazil	NA	rs80359876	c.4964_4982del19/c.4964_4982del/c.4964_4982delCTGGCCTGACCCCAGAAGA	p.Ser1655Tyrfs*16	p.S1655Yfs*16	Frameshift	Not calculated	Pathogenic	Not reported	NA	NA	(Fernandes et al., 2016)	10.18632/oncotarget.12610
BRCA1	17	AB0010X	35	Argentina	NA	rs80359876	c.4964_4982del19/c.4964_4982del/c.4964_4982delCTGGCCTGACCCCAGAAGA	p.Ser1655Tyrfs*16	p.S1655Yfs*16	Frameshift	Not calculated	Pathogenic	Not reported	NA	NA	(Solano et al., 2017)	10.18632/oncotarget.10814.
BRCA1	17	Fam 13	36	Peru	NA	rs869025213	c.4647_4648dupAA	p.T1550Kfs*10	p.T1550Kfs*10	Frameshift	Not calculated	Pathogenic	Not reported	NA	NA	(Buleje et al., 2017)	10.1002/mgg3.301
BRCA1	17	AB0425	46	Argentina	NA	rs879254305	c.1140delG	p.Gln380=fs	p.Q380=fs	Frameshift	Not calculated	Conflicting interpretations	Not reported	NA	NA	(Solano et al., 2017)	10.18632/oncotarget.10814.
BRCA1	17		48	Brazil	NA	rs886040140	c.3534delC	p.Ser1178Argfs	p.S1178Rfs	Deletion	Not calculated	Pathogenic	Not reported	NA	NA	(Alemar et al., 2017)	10.1371/journal.pone.0187630
BRCA1	17	AB0568	25	Argentina	NA	rs886040191	c.4042G>T	p.Gly1348*	p.G1348*	Nonsense	Not calculated	Pathogenic	Not reported	NA	NA	(Solano et al., 2017)	10.18632/oncotarget.10814.
BRCA1	17	CM067	29	Venezuela	NA	rs886040325	c.951_952insA	Stop 286	NA	Frameshift	Not calculated	Pathogenic	Not reported	NA	NA	(Lara et al., 2012)	10.4067/S0716-97602012000200003
BRCA1	17	A17	25	Argentina	Luminal B	rs1060915	c.4308C>T	p.Ser1436Ser	p.S1436=	Synonymous	Not calculated	Benign	Pathogenic (0.90)	COSV58783806	Meninges, Prostate, Lung, Large intestine and Haematopoietic and lymphoid	(Aceto et al., 2010)	10.1007/s10549-009-0596-6
BRCA1	17	A17	25	Argentina	Luminal B	rs3092994	c.5152+66G>A	IVS18+66G>A	NA	Polymorphisms	Not calculated	Benign	Neutral (0.02)	COSV58793783	Lung, Haematopoietic and lymphoid and Upper aerodigestive tract	(Aceto et al., 2010)	10.1007/s10549-009-0596-6
BRCA1	17	I	<40	Mexico	Luminal B	rs80358042	c.212+1G>T	NA	NA	Splice donor	Not calculated	Pathogenic	Not reported	NA	NA	(Gomez-Flores-Ramos et al., 2020)	10.20944/preprints202008.0718.v1
BRCA1	17	A17	25	Argentina	Luminal B	rs8176144	c.548-58delT	IVS8-58del	NA	Deletion	Not calculated	Benign	Not reported	NA	NA	(Aceto et al., 2010)	10.1007/s10549-009-0596-6
BRCA1	17	39	27	Mexico	TNBC	NA	c.2805_2808delAGAT	NA	NA	Frameshift	Not calculated	Not reported in Clinvar	Not reported	NA	NA	(Vaca-Paniagua et al., 2012)	10.1371/journal.pone.0037432
BRCA1	17	53186	31	Mexico	TNBC	NA	deletion exon 9–12	NA	NA	Deletion	Not calculated	Pathogenic	Not reported	NA	NA	(Villarreal-Garza et al., 2015)	10.1007/s10549-015-3312-8.
BRCA1	17	51127	32	Mexico	TNBC	NA	deletion exon 9–12	NA	NA	Deletion	Not calculated	Pathogenic	Not reported	NA	NA	(Villarreal-Garza et al., 2015)	10.1007/s10549-015-3312-8.
BRCA1	17	53178	32	Mexico	TNBC	NA	deletion exon 9–12	NA	NA	Deletion	Not calculated	Pathogenic	Not reported	NA	NA	(Villarreal-Garza et al., 2015)	10.1007/s10549-015-3312-8.
BRCA1	17	51106	33	Mexico	TNBC	NA	deletion exon 9–12	NA	NA	Deletion	Not calculated	Pathogenic	Not reported	NA	NA	(Villarreal-Garza et al., 2015)	10.1007/s10549-015-3312-8.
BRCA1	17	51061	34	Mexico	TNBC	NA	deletion exon 9–12	NA	NA	Deletion	Not calculated	Pathogenic	Not reported	NA	NA	(Villarreal-Garza et al., 2015)	10.1007/s10549-015-3312-8.
BRCA1	17	53199	35	Mexico	TNBC	NA	deletion exon 9–12	NA	NA	Deletion	Not calculated	Pathogenic	Not reported	NA	NA	(Villarreal-Garza et al., 2015)	10.1007/s10549-015-3312-8.
BRCA1	17	53205	35	Mexico	TNBC	NA	deletion exon 9–12	NA	NA	Deletion	Not calculated	Pathogenic	Not reported	NA	NA	(Villarreal-Garza et al., 2015)	10.1007/s10549-015-3312-8.
BRCA1	17	51082	38	Mexico	TNBC	NA	deletion exon 9–12	NA	NA	Deletion	Not calculated	Pathogenic	Not reported	NA	NA	(Villarreal-Garza et al., 2015)	10.1007/s10549-015-3312-8.
BRCA1	17	53249	39	Mexico	TNBC	NA	deletion exon 9–12	NA	NA	Deletion	Not calculated	Pathogenic	Not reported	NA	NA	(Villarreal-Garza et al., 2015)	10.1007/s10549-015-3312-8.
BRCA1	17	53250	40	Mexico	TNBC	NA	deletion exon 9–12	NA	NA	Deletion	Not calculated	Pathogenic	Not reported	NA	NA	(Villarreal-Garza et al., 2015)	10.1007/s10549-015-3312-8.
BRCA1	17	51080	42	Mexico	TNBC	NA	deletion exon 9–12	NA	NA	Deletion	Not calculated	Pathogenic	Not reported	NA	NA	(Villarreal-Garza et al., 2015)	10.1007/s10549-015-3312-8.
BRCA1	17	53231	42	Mexico	TNBC	NA	deletion exon 9–12	NA	NA	Deletion	Not calculated	Pathogenic	Not reported	NA	NA	(Villarreal-Garza et al., 2015)	10.1007/s10549-015-3312-8.
BRCA1	17	53206	44	Mexico	TNBC	NA	deletion exon 9–12	NA	NA	Deletion	Not calculated	Pathogenic	Not reported	NA	NA	(Villarreal-Garza et al., 2015)	10.1007/s10549-015-3312-8.
BRCA1	17	51075	45	Mexico	TNBC	NA	deletion exon 9–12	NA	NA	Deletion	Not calculated	Pathogenic	Not reported	NA	NA	(Villarreal-Garza et al., 2015)	10.1007/s10549-015-3312-8.
BRCA1	17	53270	46	Mexico	TNBC	NA	deletion exon 9–12	NA	NA	Deletion	Not calculated	Pathogenic	Not reported	NA	NA	(Villarreal-Garza et al., 2015)	10.1007/s10549-015-3312-8.
BRCA1	17	51072	47	Mexico	TNBC	NA	deletion exon 9–12	NA	NA	Deletion	Not calculated	Pathogenic	Not reported	NA	NA	(Villarreal-Garza et al., 2015)	10.1007/s10549-015-3312-8.
BRCA1	17	53253	49	Mexico	TNBC	NA	deletion exon 9–12	NA	NA	Deletion	Not calculated	Pathogenic	Not reported	NA	NA	(Villarreal-Garza et al., 2015)	10.1007/s10549-015-3312-8.
BRCA1	17	III	<40	Mexico	TNBC	NA	ex9-12del	NA	NA	Stop codon	Not calculated	Pathogenic	Not reported	NA	NA	(Gomez-Flores-Ramos et al., 2020)	10.20944/preprints202008.0718.v1
BRCA1	17	M281	≤40	Brazil	TNBC	rs1555284326	c.5644_5647delTCAA	p.Ser1882Lysfs*26	p.S1882Kfs*26	Frameshift	Not calculated	Pathogenic	Not reported	NA	NA	(Brianese et al., 2018)	10.1007/s10549-017-4552-6
BRCA1	17	5	28	Colombia	TNBC	rs28897696	c.5123C>A/5242C>A	p.A1708E	p.A1708E	Missense	Not calculated	Pathogenic	Pathogenic (0.96)	COSV58803602	Lung	(Cock-Rada et al., 2018)	10.1007/s10689-017-0004-z
BRCA1	17	53226	35	Mexico	TNBC	rs28897696	c.5123C>A/5242C>A	p.A1708E	p.A1708E	Missense	Not calculated	Pathogenic	Pathogenic (0.96)	COSV58803602	Lung	(Villarreal-Garza et al., 2015)	10.1007/s10549-015-3312-8.
BRCA1	17	51094	37	Mexico	TNBC	rs387906563	c.824_825ins10/943ins10	p.(?)	NA	Insertion	Not calculated	Pathogenic	Not reported	NA	NA	(Villarreal-Garza et al., 2015)	10.1007/s10549-015-3312-8.
BRCA1	17	51103	42	Mexico	TNBC	rs387906563	c.824_825ins10/943ins10	p.(?)	NA	Insertion	Not calculated	Pathogenic	Not reported	NA	NA	(Villarreal-Garza et al., 2015)	10.1007/s10549-015-3312-8.
BRCA1	17	53237	45	Mexico	TNBC	rs387906563	c.824_825ins10/943ins10	p.(?)	NA	Insertion	Not calculated	Pathogenic	Not reported	NA	NA	(Villarreal-Garza et al., 2015)	10.1007/s10549-015-3312-8.
BRCA1	17	51093	47	Mexico	TNBC	rs387906563	c.824_825ins10/943ins10	p.(?)	NA	Insertion	Not calculated	Pathogenic	Not reported	NA	NA	(Villarreal-Garza et al., 2015)	10.1007/s10549-015-3312-8.
BRCA1	17	53255	48	Mexico	TNBC	rs387906563	c.824_825ins10/943ins10	p.(?)	NA	Insertion	Not calculated	Pathogenic	Not reported	NA	NA	(Villarreal-Garza et al., 2015)	10.1007/s10549-015-3312-8.
BRCA1	17	SM95	≤40	Brazil	TNBC	rs397509160	c.4287C>A	p.Tyr1429Ter	p.Y1429*	Nonsense	Not calculated	Pathogenic	Not reported	NA	NA	(Brianese et al., 2018)	10.1007/s10549-017-4552-6
BRCA1	17	51119	23	Mexico	TNBC	rs41293455	c.4327C>T/4446C>T	p.R1443X	p.R1443X	Nonsense	Not calculated	Pathogenic	Neutral (0.25)	COSV58787462	Breast, endometrium, salivary gland	(Villarreal-Garza et al., 2015)	10.1007/s10549-015-3312-8.
BRCA1	17	53221	32	Mexico	TNBC	rs41293455	c.4327C>T/4446C>T	p.R1443X	p.R1443X	Nonsense	Not calculated	Pathogenic	Neutral (0.25)	COSV58787462	Breast, endometrium, salivary gland	(Villarreal-Garza et al., 2015)	10.1007/s10549-015-3312-8.
BRCA1	17	53240	39	Mexico	TNBC	rs41293455	c.4327C>T/4446C>T	p.R1443X	p.R1443X	Nonsense	Not calculated	Pathogenic	Neutral (0.25)	COSV58787462	Breast, endometrium, salivary gland	(Villarreal-Garza et al., 2015)	10.1007/s10549-015-3312-8.
BRCA1	17	53204	47	Mexico	TNBC	rs41293455	c.4327C>T/4446C>T	p.R1443X	p.R1443X	Nonsense	Not calculated	Pathogenic	Neutral (0.25)	COSV58787462	Breast, endometrium, salivary gland	(Villarreal-Garza et al., 2015)	10.1007/s10549-015-3312-8.
BRCA1	17	53252	41	Mexico	TNBC	rs62625307	c.3598C>T/3717C>T	p.Q1200X	p.Q1200X	Nonsense	Not calculated	Pathogenic	Not reported	NA	NA	(Villarreal-Garza et al., 2015)	10.1007/s10549-015-3312-8.
BRCA1	17	M287	44	Brazil	TNBC	rs80357260	c.4183C>T	p.Gln1395Ter	p.Q1395*	Nonsense	Not calculated	Pathogenic	Pathogenic (0.97)	COSV99066409	Breast	(Brianese et al., 2018)	10.1007/s10549-017-4552-6
BRCA1	17	M256	≤40	Brazil	TNBC	rs80357287	c.1A>G	p.Met1?/p.Met1Val	p.M1V	Missense	Not calculated	Pathogenic	Pathogenic (0.78)	COSV58798164	NA	(Brianese et al., 2018)	10.1007/s10549-017-4552-6
BRCA1	17	53239	31	Mexico	TNBC	rs80357382	c.211A>G	p.Arg71Gly	p.R71G	Missense	Not calculated	Pathogenic	Pathogenic (0.96)	COSV58798129	Thyroid	(Villarreal-Garza et al., 2015)	10.1007/s10549-015-3312-8.
BRCA1	17	53273	34	Mexico	TNBC	rs80357382	c.211A>G	p.Arg71Gly	p.R71G	Missense	Not calculated	Pathogenic	Pathogenic (0.96)	COSV58798129	Thyroid	(Villarreal-Garza et al., 2015)	10.1007/s10549-015-3312-8.
BRCA1	17	53271	38	Mexico	TNBC	rs80357382	c.211A>G	p.Arg71Gly	p.R71G	Missense	Not calculated	Pathogenic	Pathogenic (0.96)	COSV58798129	Thyroid	(Villarreal-Garza et al., 2015)	10.1007/s10549-015-3312-8.
BRCA1	17	51071	42	Mexico	TNBC	rs80357382	c.211A>G	p.Arg71Gly	p.R71G	Missense	Not calculated	Pathogenic	Pathogenic (0.96)	COSV58798129	Thyroid	(Villarreal-Garza et al., 2015)	10.1007/s10549-015-3312-8.
BRCA1	17	M303	41-50	Brazil	TNBC	rs80357389	c.4484G>T	p.Arg1495Met	p.R1495M	Missense	Not calculated	Pathogenic	Not reported	NA	NA	(Brianese et al., 2018)	10.1007/s10549-017-4552-6
BRCA1	17	53247	44	Mexico	TNBC	rs80357520	c.3759_3760delTA/3878delTA	p.Lys1254Glufs	p.K1254Efs	Deletion	Not calculated	Pathogenic	Not reported	NA	NA	(Villarreal-Garza et al., 2015)	10.1007/s10549-015-3312-8.
BRCA1	17	51068	49	Mexico	TNBC	rs80357520	c.3759_3760delTA/3878delTA	p.Lys1254Glufs	p.K1254Efs	Deletion	Not calculated	Pathogenic	Not reported	NA	NA	(Villarreal-Garza et al., 2015)	10.1007/s10549-015-3312-8.
BRCA1	17	6	29	Colombia	TNBC	rs80357579	c.3770_3771delAG/c.3770_3771del/3889delAG	p.Glu1257Glyfs*9	p.E1257Gfs*9	Deletion	Not calculated	Pathogenic	Not reported	NA	NA	(Cock-Rada et al., 2018)	10.1007/s10689-017-0004-z
BRCA1	17	4	32	Colombia	TNBC	rs80357600	c.1674delA/1793delA	p.Gly559Valfs	p.G559Vfs	Deletion	Not calculated	Pathogenic	Not reported	NA	NA	(Cock-Rada et al., 2018)	10.1007/s10689-017-0004-z
BRCA1	17	M282	≤40	Brazil	TNBC	rs80357706	c.2405_2406delTG/2524delTG	p.Val802Glufs*7	p.V802Efs*7	Frameshift	Not calculated	Pathogenic	Not reported	NA	NA	(Brianese et al., 2018)	10.1007/s10549-017-4552-6
BRCA1	17	51088	38	Mexico	TNBC	rs80357780	c.2296_2297delAG/2415delAG	p.Ser766Terfs	p.S766*	Deletion	Not calculated	Pathogenic	Not reported	NA	NA	(Villarreal-Garza et al., 2015)	10.1007/s10549-015-3312-8.
BRCA1	17	53188	35	Mexico	TNBC	rs80357832	c.2806_2809delGATA/2925del4	p.Asp936Serfs	p.N936Sfs	Deletion	Not calculated	Pathogenic	Not reported	NA	NA	(Villarreal-Garza et al., 2015)	10.1007/s10549-015-3312-8.
BRCA1	17	51066	37	Mexico	TNBC	rs80357832	c.2806_2809delGATA/2925del4	p.Asp936Serfs	p.N936Sfs	Deletion	Not calculated	Pathogenic	Not reported	NA	NA	(Villarreal-Garza et al., 2015)	10.1007/s10549-015-3312-8.
BRCA1	17	51084	39	Mexico	TNBC	rs80357832	c.2806_2809delGATA/2925del4	p.Asp936Serfs	p.N936Sfs	Deletion	Not calculated	Pathogenic	Not reported	NA	NA	(Villarreal-Garza et al., 2015)	10.1007/s10549-015-3312-8.
BRCA1	17	51091	42	Mexico	TNBC	rs80357832	c.2806_2809delGATA/2925del4	p.Asp936Serfs	p.N936Sfs	Deletion	Not calculated	Pathogenic	Not reported	NA	NA	(Villarreal-Garza et al., 2015)	10.1007/s10549-015-3312-8.
BRCA1	17	II	<40	Mexico	TNBC	rs80357914	c.66_67AG	p.Glu23fs		Frameshift	Not calculated	Pathogenic	Not reported	NA	NA	(Gomez-Flores-Ramos et al., 2020)	10.20944/preprints202008.0718.v1
BRCA1	17	3	29	Colombia	TNBC	rs80357914	c.66_67delAG	p.Glu23fs	p.E23fs	Frameshift	Not calculated	Pathogenic	Not reported	NA	NA	(Cock-Rada et al., 2018)	10.1007/s10689-017-0004-z
BRCA1	17	51039	34	Mexico	TNBC	rs80357914	c.66_67delAG	p.Glu23fs	p.E23fs	Frameshift	Not calculated	Pathogenic	Not reported	NA	NA	(Villarreal-Garza et al., 2015)	10.1007/s10549-015-3312-8.
BRCA1	17	53191	42	Mexico	TNBC	rs80357914	c.66_67delAG	p.Glu23fs	p.E23fs	Frameshift	Not calculated	Pathogenic	Not reported	NA	NA	(Villarreal-Garza et al., 2015)	10.1007/s10549-015-3312-8.
BRCA1	17	53243	46	Mexico	TNBC	rs80357914	c.66_67delAG	p.Glu23fs	p.E23fs	Frameshift	Not calculated	Pathogenic	Not reported	NA	NA	(Villarreal-Garza et al., 2015)	10.1007/s10549-015-3312-8.
BRCA1	17	M292	≤40	Brazil	TNBC	rs80358178	c.4096+1G>A	IVS11+1G>A	NA	Splice site	Not calculated	Uncertain significance	Not reported	NA	NA	(Brianese et al., 2018)	10.1007/s10549-017-4552-6
BRCA2	13	CM069	47	Venezuela	ER(+), PR(+)	rs1801426	c.10234A>G	p.I3412V	p.I3412V	Missense	Benign	Benign	Neutral (0.02)	COSV58412412	Meninges, prostate, soft tisue, peritoneum	(Lara et al., 2012)	10.4067/S0716-97602012000200003
BRCA2	13	31	39	Mexico	ER(+), PR(+), HER2(-)	rs11571707	c.7469T>C/7697T>C/7697T/C	p.Ile2490Thr/I2490T	p.I2490T	Missense	Benign	Benign	Neutral (0.16)	COSV104430689	Meninges	(Vaca-Paniagua et al., 2012)	10.1371/journal.pone.0037432
BRCA2	13	2	30	Mexico	ER(+), PR(+), HER2(-)	rs1801426	c.10234A>G	p.I3412V	p.I3412V	Missense	Benign	Benign	Neutral (0.02)	COSV58412412	Meninges, prostate, soft tisue, peritoneum	(Vaca-Paniagua et al., 2012)	10.1371/journal.pone.0037432
BRCA2	13	16	28	Mexico	ER(+), PR(+), HER2(-)	rs4987117	c.5744C>T	p.T1915M	p.T1915M	Missense	Benign	Benign	Neutral (0.00)	COSV66459591	Soft tissue, Large intestine, Breast, Stomach and Meninges	(Vaca-Paniagua et al., 2012)	10.1371/journal.pone.0037432
BRCA2	13	26	29	Mexico	ER(+), PR(+), HER2(+)	rs1801426	c.10234A>G	p.I3412V	p.I3412V	Missense	Benign	Benign	Neutral (0.02)	COSV58412412	Meninges, prostate, soft tisue, peritoneum	(Vaca-Paniagua et al., 2012)	10.1371/journal.pone.0037432
BRCA2	13	28	25	Mexico	TNBC	rs11571707	c.7469T>C/7697T>C/7697T/C	p.Ile2490Thr/I2490T	p.I2490T	Missense	Benign	Benign	Neutral (0.16)	COSV104430689	Meninges	(Vaca-Paniagua et al., 2012)	10.1371/journal.pone.0037432
BRCA2	13	21	27	Mexico	TNBC	rs11571707	c.7469T>C/7697T>C/7697T/C	p.Ile2490Thr/I2490T	p.I2490T	Missense	Benign	Benign	Neutral (0.16)	COSV104430689	Meninges	(Vaca-Paniagua et al., 2012)	10.1371/journal.pone.0037432
BRCA2	13	27	33	Mexico	TNBC	rs11571707	c.7469T>C/7697T>C/7697T/C	p.Ile2490Thr/I2490T	p.I2490T	Missense	Benign	Benign	Neutral (0.16)	COSV104430689	Meninges	(Vaca-Paniagua et al., 2012)	10.1371/journal.pone.0037432
BRCA2	13	19	36	Mexico	TNBC	rs11571707	c.7469T>C/7697T>C/7697T/C	p.Ile2490Thr/I2490T	p.I2490T	Missense	Benign	Benign	Neutral (0.16)	COSV104430689	Meninges	(Vaca-Paniagua et al., 2012)	10.1371/journal.pone.0037432
BRCA2	13	31	39	Mexico	TNBC	rs1801426	c.10234A>G	p.I3412V	p.I3412V	Missense	Benign	Benign	Neutral (0.02)	COSV58412412	Meninges, prostate, soft tisue, peritoneum	(Vaca-Paniagua et al., 2012)	10.1371/journal.pone.0037432
BRCA2	13	F1	47	Chile	NA	NA	c.568C>T	p.H114Y	p.H114Y	Missense	Benign	Uncertain significance	Not reported	NA	NA	(Gonzalez-Hormazabal et al., 2011)	10.1007/s10549-010-1170-y
BRCA2	13	F1	47	Chile	NA	NA	c.568C>T	p.His114Tyr	p.H114Y	Missense	Benign	Uncertain significance	Not reported	NA	NA	(Jara et al., 2006)	10.1016/j.cancergencyto.2005.08.019
BRCA2	13		46	Brazil	NA	NA	c.6611delC	p.Pro2204Leufs*2	p.P2204Lfs*2	Frameshift	Benign	Pathogenic	Not reported	NA	NA	(Fernandes et al., 2016)	10.18632/oncotarget.12610
BRCA2	13	SM-24	42	Brazil	NA	rs11571640	c.964A>C/1192A>C	p.K322Q	p.K322Q	Missense	Benign	Conflicting interpretations	Not reported	NA	NA	(Silva et al., 2014)	10.1186/1471-2350-15-55
BRCA2	13	SM-20	35	Brazil	NA	rs11571653	c.2350A>G/2578A>G	p.M784V	p.M784V	Missense	Benign	Benign	Neutral (0.01)	COSV66460417	Upper aerodigestive tract and Meninges	(Silva et al., 2014)	10.1186/1471-2350-15-55
BRCA2	13	SM-24	42	Brazil	NA	rs11571653	c.2350A>G/2578A>G	p.M784V	p.M784V	Missense	Benign	Benign	Neutral (0.01)	COSV66460417	Upper aerodigestive tract and Meninges	(Silva et al., 2014)	10.1186/1471-2350-15-55
BRCA2	13	SM-39	45	Brazil	NA	rs11571653	c.2350A>G/2578A>G	p.M784V	p.M784V	Missense	Benign	Benign	Neutral (0.01)	COSV66460417	Upper aerodigestive tract and Meninges	(Silva et al., 2014)	10.1186/1471-2350-15-55
BRCA2	13		27	Brazil	NA	rs11571657	c.5640T>G	p.Asn1880Lys	p.N1880K	Missense	Benign	Benign	Not reported	NA	NA	(Fernandes et al., 2016)	10.18632/oncotarget.12610
BRCA2	13		49	Brazil	NA	rs11571659	c.6412G>T	p.Val2138Phe	p.V2138F	Missense	Benign	Conflicting interpretations	Neutral (0.09)	COSV66453045	Prostate and Soft tissue	(Fernandes et al., 2016)	10.18632/oncotarget.12610
BRCA2	13		29	Brazil	NA	rs11571707	c.7469T>C	p.Ile2490Thr	p.I2490T	Missense	Benign	Benign	Neutral (0.16)	COSV104430689	Meninges	(Fernandes et al., 2016)	10.18632/oncotarget.12610
BRCA2	13	A31	21	Argentina	NA	rs11571707	c.7469T>C	p.Ile2490Thr	p.I2490T	Missense	Benign	Benign	Neutral (0.16)	COSV104430689	Meninges	(Aceto et al., 2010)	10.1007/s10549-009-0596-6
BRCA2	13	9	42	Colombia	NA	rs11571707	c.7469T>C/7697T>C/7697T/C	p.Ile2490Thr/I2490T	p.I2490T	Missense	Benign	Benign	Neutral (0.16)	COSV104430689	Meninges	(Torres et al., 2007)	10.1007/s10549-006-9370-1
BRCA2	13	CM040	38	Venezuela	NA	rs11571707	c.7469T>C/c.7697T>C	p.I2490T	p.I2490T	Missense	Benign	Benign	Pathogenicity not defined	COSV104430689	Meninges	(Lara et al., 2012)	10.4067/S0716-97602012000200003
BRCA2	13	30317	32	Cuba	NA	rs11571707	c.7469T>C/c.7697T>C	p.I2490T	p.I2490T	Missense	Benign	Benign	Neutral (0.16)	COSV104430689	Meninges	(Rodriguez et al., 2008)	10.1007/s10689-008-9187-7
BRCA2	13	SM-46	32	Brazil	NA	rs11571707	c.7469T>C/c.7697T>C	p.I2490T	p.I2490T	Missense	Benign	Benign	Neutral (0.16)	COSV104430689	Meninges	(Silva et al., 2014)	10.1186/1471-2350-15-55
BRCA2	13	MO-30	40	Brazil	NA	rs11571707	c.7469T>C/c.7697T>C	p.I2490T	p.I2490T	Missense	Benign	Benign	Neutral (0.16)	COSV104430689	Meninges	(Silva et al., 2014)	10.1186/1471-2350-15-55
BRCA2	13		35	Brazil	NA	rs142243359	c.2274T>G	p.Ser758Arg	p.S758R	Polymorphism	Benign	Conflicting interpretations	Not reported	NA	NA	(Fernandes et al., 2016)	10.18632/oncotarget.12610
BRCA2	13	5	33	Mexico	NA	rs1799944	c.2971A>G/3199A>G/A3199G	p.Asn991Asp	p.N991D	Missense	Benign	Benign	Neutral (0.01)	COSV66450658	Prostate, Meninges, Soft tissue and Haematopoietic and lymphoid	(Calderón-Garcidueñas et al., 2005)	http://www.scielo.org.mx/scielo.php?pid=S0036-36342005000200004&script=sci_abstract&tlng=en
BRCA2	13	7	34	Mexico	NA	rs1799944	c.2971A>G/3199A>G/A3199G	p.Asn991Asp	p.N991D	Missense	Benign	Benign	Neutral (0.01)	COSV66450658	Prostate, Meninges, Soft tissue and Haematopoietic and lymphoid	(Calderón-Garcidueñas et al., 2005)	http://www.scielo.org.mx/scielo.php?pid=S0036-36342005000200004&script=sci_abstract&tlng=en
BRCA2	13	CM009	46	Venezuela	NA	rs1799954	c.6100C>T/6328C>T	p.Arg2034Cys	p.R2034C	Missense	Benign	Benign	Not reported	NA	NA	(Lara et al., 2012)	10.4067/S0716-97602012000200003
BRCA2	13	3	24	Mexico	NA	rs1801426	c.10234A>G	p.Ile3412Val	p.I3412V	Missense	Benign	Benign	Neutral (0.02)	COSV58412412	Meninges, prostate, soft tisue, peritoneum	(Calderón-Garcidueñas et al., 2005)	http://www.scielo.org.mx/scielo.php?pid=S0036-36342005000200004&script=sci_abstract&tlng=en
BRCA2	13	1	30	Mexico	NA	rs1801426	c.10234A>G	p.Ile3412Val	p.I3412V	Missense	Benign	Benign	Neutral (0.02)	COSV58412412	Meninges, prostate, soft tisue, peritoneum	(Calderón-Garcidueñas et al., 2005)	http://www.scielo.org.mx/scielo.php?pid=S0036-36342005000200004&script=sci_abstract&tlng=en
BRCA2	13	2	34	Mexico	NA	rs1801426	c.10234A>G	p.Ile3412Val	p.I3412V	Missense	Benign	Benign	Neutral (0.02)	COSV58412412	Meninges, prostate, soft tisue, peritoneum	(Calderón-Garcidueñas et al., 2005)	http://www.scielo.org.mx/scielo.php?pid=S0036-36342005000200004&script=sci_abstract&tlng=en
BRCA2	13	CM083	33	Venezuela	NA	rs1801426	c.10234A>G	p.I3412V	p.I3412V	Missense	Benign	Benign	Neutral (0.02)	COSV58412412	Meninges, prostate, soft tisue, peritoneum	(Lara et al., 2012)	10.4067/S0716-97602012000200003
BRCA2	13	CM037	48	Venezuela	NA	rs1801426	c.10234A>G	p.I3412V	p.I3412V	Missense	Benign	Benign	Neutral (0.02)	COSV58412412	Meninges, prostate, soft tisue, peritoneum	(Lara et al., 2012)	10.4067/S0716-97602012000200003
BRCA2	13	MO-09	42	Brazil	NA	rs1801426	c.10234A>G	p.I3412V	p.I3412V	Missense	Benign	Benign	Neutral (0.02)	COSV58412412	Meninges, prostate, soft tisue, peritoneum	(Silva et al., 2014)	10.1186/1471-2350-15-55
BRCA2	13		28	Brazil	NA	rs2219594	c.4681C>A/4909C>A	p.His1561Asn	p.H1561N	Missense	Benign	Conflicting interpretations	Neutral (0.06)	COSV66453039	Prostate and Soft tissue	(Fernandes et al., 2016)	10.18632/oncotarget.12610
BRCA2	13		40	Brazil	NA	rs28897731	c.4928T>C	p.V1643A	p.V1643A	Missense	Benign	Conflicting interpretations	Not reported	NA	NA	(Fernandes et al., 2016)	10.18632/oncotarget.12610
BRCA2	13		48	Brazil	NA	rs28897743	c.7007G>A	p.Arg2336His	p.R2336H	Missense	Benign	Pathogenic	Pathogenic (0.88)	COSV66456373	Oesophagus and Stomach	(Alemar et al., 2017)	10.1371/journal.pone.0187630
BRCA2	13	52	35	Mexico	NA	rs4987046	353A>G	p.Tyr42Cys	p.Y42C	Missense	Benign	Pathogenic	Not reported	NA	NA	(Ruiz-Flores et al., 2002)	10.1002/humu.9084
BRCA2	13	F40	39	Chile	NA	rs4987117	c.5744C>T /5972C>T	p.T1915M	p.T1915M	Missense	Benign	Benign	Neutral (0.00)	COSV66459591	Soft tissue, Large intestine, Breast, Stomach and Meninges	(Gonzalez-Hormazabal et al., 2011)	10.1007/s10549-010-1170-y
BRCA2	13	F40	39	Chile	NA	rs4987117	c.5744C>T /5972C>T	p.T1915M	p.T1915M	Missense	Benign	Benign	Neutral (0.00)	COSV66459591	Soft tissue, Large intestine, Breast, Stomach and Meninges	(Jara et al., 2006)	10.1016/j.cancergencyto.2005.08.019
BRCA2	13		26	Brazil	NA	rs55953736	c.6347A>G	p.His2116Arg	p.H2116R	Missense	Benign	Benign	Neutral (0.26)	COSV66457909	Soft tissue and Breast	(Fernandes et al., 2016)	10.18632/oncotarget.12610
BRCA2	13		37	Brazil	NA	rs587782191	c.7507G>A	p.Val2503Ile	p.V2503I	Missense	Benign	Conflicting interpretations	Neutral (0.12)	COSV66451402	Large intestine	(Fernandes et al., 2016)	10.18632/oncotarget.12610
BRCA2	13	5	33	Mexico	NA	rs766173	c.865A>C /1093A>C	p.N289H	p.N289H	Missense	Benign	Benign	Neutral (0.10)	COSV66448377	Prostate, Meninges, Soft tissue, Haematopoietic and lymphoid and Pancreas	(Calderón-Garcidueñas et al., 2005)	http://www.scielo.org.mx/scielo.php?pid=S0036-36342005000200004&script=sci_abstract&tlng=en
BRCA2	13	7	34	Mexico	NA	rs766173	c.865A>C /1093A>C	p.N289H	p.N289H	Missense	Benign	Benign	Neutral (0.10)	COSV66448377	Prostate, Meninges, Soft tissue, Haematopoietic and lymphoid and Pancreas	(Calderón-Garcidueñas et al., 2005)	http://www.scielo.org.mx/scielo.php?pid=S0036-36342005000200004&script=sci_abstract&tlng=en
BRCA2	13		24	Brazil	NA	rs80358732	c.5096A>G	p.Asp1699Gly	p.D1699G	Missense	Benign	Uncertain significance	Neutral (0.33)	COSV101204009	Lung	(Fernandes et al., 2016)	10.18632/oncotarget.12610
BRCA2	13		29	Brazil	NA	rs80358967	c.7448G>A	p.Ser2483Asn	p.S2483N	Missense	Benign	Conflicting interpretations	Not reported	NA	NA	(Fernandes et al., 2016)	10.18632/oncotarget.12610
BRCA2	13		24	Brazil	NA	rs876661032	c.6988A>G	p.Ile2330Val	p.I2330V	Missense	Benign	Uncertain significance	Not reported	NA	NA	(Fernandes et al., 2016)	10.18632/oncotarget.12610
BRCA2	13		31	Brazil	NA	rs980859921	c.6554C>T	p.Ala2185Val	p.A2185V	Missense	Benign	Conflicting interpretations	Not reported	NA	NA	(Fernandes et al., 2016)	10.18632/oncotarget.12610
BRCA2	13	CM039	36	Venezuela	ER(-), PR(-), HER2(-)	NA	c.9799T>C	p.W3191R	p.W3191R	Missense	Possibly damaging	Pathogenic	Not reported	NA	NA	(Lara et al., 2012)	10.4067/S0716-97602012000200003
BRCA2	13	19	36	Uruguay	NA	NA	c.3714_3747del/3829insTdel35	p.Gln1240Valfs	p.Q1240Vfs	Frameshift	Possibly damaging	Not reported in Clinvar	Not reported	NA	NA	(Delgado et al., 2011)	10.1007/s10549-010-1320-2
BRCA2	13	F16	48	Chile	NA	NA	c.5015A>C	p.N1596S	p.N1596S	Missense	Possibly damaging	Not reported in Clinvar	Not reported	NA	NA	(Gonzalez-Hormazabal et al., 2011)	10.1007/s10549-010-1170-y
BRCA2	13	F16	48	Chile	NA	NA	c.5015A>C	p.Asn1596Ser	p.N1596S	Missense	Possibly damaging	Not reported in Clinvar	Not reported	NA	NA	(Jara et al., 2006)	10.1016/j.cancergencyto.2005.08.019
BRCA2	13	AB0231	46	Argentina	NA	NA	c.7159G>C	p.Ala2387Pro	p.A238P	Missense	Possibly damaging	Uncertain significance	Not reported	NA	NA	(Solano et al., 2017)	10.18632/oncotarget.10814.
BRCA2	13	AB0402	42	Argentina	NA	rs1421854019	c.1277A>C	p.Lys426Thr	p.K426T	Missense	Possibly damaging	Uncertain significance	Not reported	NA	NA	(Solano et al., 2017)	10.18632/oncotarget.10814.
BRCA2	13	AB0185	43	Argentina	NA	NA	c.3316A>G	p.Ser1106Gly	p.S1106G	Missense	Probably damaging	Not reported in Clinvar	Not reported	NA	NA	(Solano et al., 2017)	10.18632/oncotarget.10814.
BRCA2	13	AB0258	37	Argentina	NA	NA	c.8038G>A	p.Asp2680Asn	p.D2680N	Missense	Probably damaging	Novel mutation	Not reported	NA	NA	(Solano et al., 2017)	10.18632/oncotarget.10814.
BRCA2	13		32	Brazil	NA	NA	c.8755G>T	p.Gly2919Cys	p.G2919C	NA	Probably damaging	Not reported in Clinvar	Not reported	NA	NA	(Fernandes et al., 2016)	10.18632/oncotarget.12610
BRCA2	13		39	Brazil	NA	NA	c.9282_9397del	p.Asp3095Argfs	p.D3095	NA	Probably damaging	Not reported in Clinvar	Not reported	NA	NA	(Alemar et al., 2017)	10.1371/journal.pone.0187630
BRCA2	13		20	Brazil	NA	rs28897701	c.223G>C/451G>C	p.Ala75Pro	p.A75P	Polymorphism	Probably damaging	Benign	Pathogenic (0.98)	COSV99061709	Skin and Breast	(Fernandes et al., 2016)	10.18632/oncotarget.12610
BRCA2	13		27	Brazil	NA	rs28897728	c.4585G>A	p.Gly1529Arg	p.G1529R	Missense	Probably damaging	Benign	Pathogenic (0.99)	COSV66449793	Endometrium, Pancreas, Prostate, Breast and Central nervous system	(Fernandes et al., 2016)	10.18632/oncotarget.12610
BRCA2	13		28	Brazil	NA	rs80358916	c.6935A>T	p.Asp2312Val	p.D2312V	Polymorphism	Probably damaging	Benign	Not reported	NA	NA	(Fernandes et al., 2016)	10.18632/oncotarget.12610
BRCA2	13	A11	12	Argentina	Basal	NA	c.426+67A>C	IVS4	NA	NA	Not calculated	Not reported in Clinvar	Not reported	NA	NA	(Aceto et al., 2010)	10.1007/s10549-009-0596-6
BRCA2	13	A11	12	Argentina	Basal	rs11147489	c.7435+53C>T	IVS14+53C>T	NA	Polymorphism	Not calculated	Benign	Not reported	NA	NA	(Aceto et al., 2010)	10.1007/s10549-009-0596-6
BRCA2	13	A11	12	Argentina	Basal	rs3783265	c.426-89T>C	IVS4-89T>C	NA	Polymorphism	Not calculated	Benign	Not reported	NA	NA	(Aceto et al., 2010)	10.1007/s10549-009-0596-6
BRCA2	13	CM081	38	Venezuela	ER(-)	rs80359537	c.5796_5797delTA/6024_6025delTA	p.His1932Glnfs	p.H1932Qfs	Frameshift	Not calculated	Pathogenic	Not reported	NA	NA	(Lara et al., 2012)	10.4067/S0716-97602012000200003
BRCA2	13	MP045	44	Brazil	ER(+)	rs45580035	c.9154C>T	p.Arg3052Trp	p.R3052W	Missense	Not calculated	Pathogenic	Not reported	NA	NA	(Cipriano et al., 2018)	10.1007/s12282-018-00938-z
BRCA2	13	CM012	37	Venezuela	ER(+)	rs80359035	c.8009C>T/8237C>T	p.S2670L	p.S2670L	Missense	Not calculated	Pathogenic/Likely pathogenic	Pathogenicity not defined	COSV66453386	Large intestine	(Lara et al., 2012)	10.4067/S0716-97602012000200003
BRCA2	13	MP016	42	Brazil	ER(+)	rs80359277	c.1310_1313delAAGA	p.Lys437Ilefs*22	p.K437Ifs*22	Frameshift	Not calculated	Pathogenic	Not reported	NA	NA	(Cipriano et al., 2018)	10.1007/s12282-018-00938-z
BRCA2	13	MP005	48	Brazil	ER(+), PR(+)	rs80358547	c.2T>G	p.Met1Arg	p.M1R	Missense	Not calculated	Pathogenic	Not reported	NA	NA	(Cipriano et al., 2018)	10.1007/s12282-018-00938-z
BRCA2	13	MP079	43	Brazil	ER(+), PR(+)	rs80359468	c.4829_4830delTG	p.Val1610GlyfsTer4	p.V1610Gfs*4	Frameshift	Not calculated	Pathogenic	Not reported	NA	NA	(Cipriano et al., 2018)	10.1007/s12282-018-00938-z
BRCA2	13	1	31	Mexico	ER(+), PR(+), HER2(+)	NA	c.5114_5117delTAAA	NA	NA	Frameshift	Not calculated	Not reported in Clinvar	Not reported	NA	NA	(Vaca-Paniagua et al., 2012)	10.1371/journal.pone.0037432
BRCA2	13	30	24	Mexico	ER(+), PR(+), HER2(+)	rs28897754	c.8850G>T/9078G>T	p.K2950N	p.K2950N	Missense	Not calculated	Conflicting interpretations	Pathogenic (0.86)	COSV66455693	Soft tissue and Breast	(Vaca-Paniagua et al., 2012)	10.1371/journal.pone.0037432
BRCA2	13	7	41	Colombia	HR(+), HER2(-)	NA	deletion exons 15-16	NA	NA	Deletion	Not calculated	Not reported in Clinvar	Not reported	NA	NA	(Cock-Rada et al., 2018)	10.1007/s10689-017-0004-z
BRCA2	13	ID_2031	24	Brazil	HR(+), HER2(-)	NA	c.2494C>T	p.Q756X	p.Q756X	Nonsense	Not calculated	Not reported in Clinvar	Not reported	NA	NA	(Carraro et al., 2013)	10.1371/journal.pone.0057581
BRCA2	13	ID_2032	29	Brazil	HR(+), HER2(-)	NA	c.4968insGT	NA	NA	Frameshift	Not calculated	Not reported in Clinvar	Not reported	NA	NA	(Carraro et al., 2013)	10.1371/journal.pone.0057581
BRCA2	13	ID_2048	35	Brazil	HR(+), HER2(-)	NA	c.5190T>A	p.C1654X	p.C1654X	Nonsense	Not calculated	Not reported in Clinvar	Not reported	NA	NA	(Carraro et al., 2013)	10.1371/journal.pone.0057581
BRCA2	13	ID_2025	35	Brazil	HR(+), HER2(-)	rs80359351	c.2808_2811del/c.2806_2809delAAAC/3036del4/3034del4/c.2808_2811delACAA/3036_3039delACAA	p.Ala938Profs	p.A938Pfs	Frameshift	Not calculated	Pathogenic	Pathogenicity not defined	COSV66447416	Ovary, Prostate and Haematopoietic and lymphoid	(Carraro et al., 2013)	10.1371/journal.pone.0057581
BRCA2	13	8	35	Colombia	HR(+), HER2(-)	rs80359525	c.5616_5620delAGTAA/5844del5	p.Lys1872Asnfs*2	p.K1872Nfs*2	Frameshift	Not calculated	Pathogenic	Not reported	NA	NA	(Cock-Rada et al., 2018)	10.1007/s10689-017-0004-z
BRCA2	13	14	43	Colombia	HR(+), HER2(-)	rs80359554	c.6024dupG	p.Gln2009Alafs	p.Q2009Afs	Duplication	Not calculated	Pathogenic	Not reported	NA	NA	(Cock-Rada et al., 2018)	10.1007/s10689-017-0004-z
BRCA2	13	13	31	Colombia	HR(+), HER2(-)	rs886038189	c.9246dupG	p.Lys3083Glufs	p.K3083Efs	Duplication	Not calculated	Pathogenic	Not reported	NA	NA	(Cock-Rada et al., 2018)	10.1007/s10689-017-0004-z
BRCA2	13	11	35	Colombia	HR(+), HER2(-)	rs886038189	c.9246dupG	p.Lys3083Glufs	p.K3083Efs	Duplication	Not calculated	Pathogenic	Not reported	NA	NA	(Cock-Rada et al., 2018)	10.1007/s10689-017-0004-z
BRCA2	13	10	39	Colombia	HR(+), HER2(-)	rs886038189	c.9246dupG	p.Lys3083Glufs	p.K3083Efs	Duplication	Not calculated	Pathogenic	Not reported	NA	NA	(Cock-Rada et al., 2018)	10.1007/s10689-017-0004-z
BRCA2	13	12	43	Colombia	HR(+), HER2(-)	rs886038189	c.9246dupG	p.Lys3083Glufs	p.K3083Efs	Duplication	Not calculated	Pathogenic	Not reported	NA	NA	(Cock-Rada et al., 2018)	10.1007/s10689-017-0004-z
BRCA2	13	9	41	Colombia	HR(+), HER2(+)	rs886038189	c.9246dupG	p.Lys3083Glufs	p.K3083Efs	Duplication	Not calculated	Pathogenic	Not reported	NA	NA	(Cock-Rada et al., 2018)	10.1007/s10689-017-0004-z
BRCA2	13	A18	21	Argentina	Luminal A	rs1799955	c.7242A>G	p.Ser2414Ser	p.S2414=	Synonymous	Not calculated	Benign	Neutral (0.06)	COSV66447569	Soft tissue, Meninges, Prostate, Haematopoietic and lymphoid and Breast	(Aceto et al., 2010)	10.1007/s10549-009-0596-6
BRCA2	13		32	Mexico	NA	NA	2663_2664insA	NA	NA	Duplication	Not calculated	Pathogenic	Not reported	NA	NA	(Ruiz-Flores et al., 2002)	10.1002/humu.9084
BRCA2	13	13	32	Mexico	NA	NA	2664InsA	ter826	NA	Frameshift	Not calculated	Pathogenic	Not reported	NA	NA	(Calderón-Garcidueñas et al., 2005)	http://www.scielo.org.mx/scielo.php?pid=S0036-36342005000200004&script=sci_abstract&tlng=en
BRCA2	13	M1768	45	Mexico	NA	NA	2971del5	NA	NA	NA	Not calculated	Not reported in Clinvar	Not reported	NA	NA	(Torres-Mejia et al., 2015)	10.1158/1055-9965.EPI-13-0980
BRCA2	13	23	41	Colombia	NA	NA	3034delACAA	Stop 958	NA	FrameShift	Not calculated	Not reported in Clinvar	Not reported	NA	NA	(Torres et al., 2007)	10.1007/s10549-006-9370-1
BRCA2	13	4	47	Colombia	NA	NA	3034delACAA	Stop 958	NA	FrameShift	Not calculated	Not reported in Clinvar	Not reported	NA	NA	(Torres et al., 2007)	10.1007/s10549-006-9370-1
BRCA2	13	16	48	Colombia	NA	NA	6076delGTTA	Stop1962	NA	FrameShift	Not calculated	Not reported in Clinvar	Not reported	NA	NA	(Torres et al., 2007)	10.1007/s10549-006-9370-1
BRCA2	13	41	28	Mexico	NA	NA	6580G>T	p.Val2118Leu	p.V2118L	Missense	Not calculated	Not reported in Clinvar	Not reported	NA	NA	(Ruiz-Flores et al., 2002)	10.1002/humu.9084
BRCA2	13	CM031	49	Venezuela	NA	NA	c.1282T>C	p.Y352H	p.Y352H	Missense	Not calculated	Not reported in Clinvar	Not reported	NA	NA	(Lara et al., 2012)	10.4067/S0716-97602012000200003
BRCA2	13	36-RJ	39	Brazil	NA	NA	c.156_157insAlu	NA	NA	Insertion	Not calculated	Pathogenic	Not reported	NA	NA	(Ewald et al., 2016)	10.1590/1678-4685-GMB-2014-0350
BRCA2	13	56-RJ	48	Brazil	NA	NA	c.156_157insAlu	NA	NA	Insertion	Not calculated	Pathogenic	Not reported	NA	NA	(Ewald et al., 2016)	10.1590/1678-4685-GMB-2014-0350
BRCA2	13		29	Brazil	NA	NA	c.156_157insAlu	NA	NA	Rearrangement	Not calculated	Pathogenic	Not reported	NA	NA	(Fernandes et al., 2016)	10.18632/oncotarget.12610
BRCA2	13	SM-41	35	Brazil	NA	NA	c.1711G>A	p.A495T	p.A495T	NA	Not calculated	Not reported in Clinvar	Not reported	NA	NA	(Silva et al., 2014)	10.1186/1471-2350-15-55
BRCA2	13		41	Uruguay	NA	NA	c.213_12A>G	NA	NA	NA	Not calculated	Not reported in Clinvar	Not reported	NA	NA	(Valle et al., 2017)	http://revista.rmu.org.uy/ojsrmu311/index.php/rmu/article/view/112
BRCA2	13		44	Brazil	NA	NA	c.2505dupA	p.Pro836Thrfs	p.P836Tfs	Frameshift	Not calculated	Pathogenic	Not reported	NA	NA	(Alemar et al., 2017)	10.1371/journal.pone.0187630
BRCA2	13	15	37	Mexico	NA	NA	c.2639_2640delTG	NA	NA	Frameshift	Not calculated	Not reported in Clinvar	Not reported	NA	NA	(Vaca-Paniagua et al., 2012)	10.1371/journal.pone.0037432
BRCA2	13		37,3	Uruguay	NA	NA	c.2C>T	NA	NA	NA	Not calculated	Not reported in Clinvar	Not reported	NA	NA	(Valle et al., 2017)	http://revista.rmu.org.uy/ojsrmu311/index.php/rmu/article/view/112
BRCA2	13	CM031	49	Venezuela	NA	NA	c.3479G>A	p.S1084N	p.S1084N	Missense	Not calculated	Conflicting interpretations	Not reported	NA	NA	(Lara et al., 2012)	10.4067/S0716-97602012000200003
BRCA2	13	30206	39	Cuba	NA	NA	c.4637_4641delTAAGA	NA	NA	NA	Not calculated	Not reported in Clinvar	Not reported	NA	NA	(Rodriguez et al., 2008)	10.1007/s10689-008-9187-7
BRCA2	13	F325	34	Chile	NA	NA	c.4740_4741insTG	p.S1580fs	p.S1580fs	Frameshift	Not calculated	Pathogenic	Not reported	NA	NA	(Gonzalez-Hormazabal et al., 2011)	10.1007/s10549-010-1170-y
BRCA2	13	f77	34	Chile	NA	NA	c.4740_4741insTG	p.S1580fs	p.S1580fs	Frameshift	Not calculated	Pathogenic	Not reported	NA	NA	(Gonzalez-Hormazabal et al., 2011)	10.1007/s10549-010-1170-y
BRCA2	13	F179	32	Chile	NA	NA	c.4747_4749delATT	p.1583del	NA	Deletion	Not calculated	Uncertain significance	Not reported	NA	NA	(Gonzalez-Hormazabal et al., 2011)	10.1007/s10549-010-1170-y
BRCA2	13		48	Uruguay	NA	NA	c.5144_5147delTGTA	NA	NA	NA	Not calculated	Not reported in Clinvar	Not reported	NA	NA	(Valle et al., 2017)	http://revista.rmu.org.uy/ojsrmu311/index.php/rmu/article/view/112
BRCA2	13		36	Brazil	NA	NA	c.5216dupA	p.Tyr1739Ter	p.Y1739*	Frameshift	Not calculated	Pathogenic	Not reported	NA	NA	(Fernandes et al., 2016)	10.18632/oncotarget.12610
BRCA2	13	F127	25	Chile	NA	NA	c.5374_5377delTATG	p.Y1716fs (Stop 1723)	p.Y1716fs	Frameshift	Not calculated	Pathogenic	Not reported	NA	NA	(Gonzalez-Hormazabal et al., 2011)	10.1007/s10549-010-1170-y
BRCA2	13	F79	27	Chile	NA	NA	c.5374_5377delTATG	p.Y1716fs (Stop 1723)	p.Y1716fs	Frameshift	Not calculated	Pathogenic	Not reported	NA	NA	(Gonzalez-Hormazabal et al., 2011)	10.1007/s10549-010-1170-y
BRCA2	13	F105	41	Chile	NA	NA	c.5374_5377delTATG	p.Y1716fs (Stop 1723)	p.Y1716fs	Frameshift	Not calculated	Pathogenic	Not reported	NA	NA	(Gonzalez-Hormazabal et al., 2011)	10.1007/s10549-010-1170-y
BRCA2	13	F281	43	Chile	NA	NA	c.5374_5377delTATG	p.Y1716fs (Stop 1723)	p.Y1716fs	Frameshift	Not calculated	Pathogenic	Not reported	NA	NA	(Gonzalez-Hormazabal et al., 2011)	10.1007/s10549-010-1170-y
BRCA2	13	F37	43	Chile	NA	NA	c.5667delT	p.L1813fs (Stop1814)	p.L1813fs	Frameshift	Not calculated	Pathogenic	Not reported	NA	NA	(Gonzalez-Hormazabal et al., 2011)	10.1007/s10549-010-1170-y
BRCA2	13	F37	43	Chile	NA	NA	c.5667delT	p.Leu1813fs(Stop1814)	p.L1813fs	Frameshift	Not calculated	Pathogenic	Not reported	NA	NA	(Jara et al., 2006)	10.1016/j.cancergencyto.2005.08.019
BRCA2	13	AB34	40	Argentina	NA	NA	c.6037A>T	p.Lys1213Stop	p.K1213*	Truncating	Not calculated	Pathogenic	Not reported	NA	NA	(Solano et al., 2012)	10.1186/2193-1801-1-20
BRCA2	13	AB98	35	Argentina	NA	NA	c.7105insA	Stop cod2391	NA	Truncating	Not calculated	Pathogenic	Not reported	NA	NA	(Solano et al., 2012)	10.1186/2193-1801-1-20
BRCA2	13	AB99	31	Argentina	NA	NA	c.793+1delG	NA	NA	Splice defect	Not calculated	Pathogenic	Not reported	NA	NA	(Solano et al., 2012)	10.1186/2193-1801-1-20
BRCA2	13		30	Brazil	NA	NA	c.8711delT	p.Leu2904Leufs*4	p.L2904Lfs*4	Frameshift	Not calculated	Not reported in Clinvar	Not reported	NA	NA	(Fernandes et al., 2016)	10.18632/oncotarget.12610
BRCA2	13	AB0508	46	Argentina	NA	NA	c.9789_9790delGA	p.Lys3263=fs	p.K3263=fs	FrameShift	Not calculated	Pathogenic	Not reported	NA	NA	(Solano et al., 2017)	10.18632/oncotarget.10814.
BRCA2	13	SM-53	30	Brazil	NA	rs1057518635	c.6014_6017delATAG/c.6242del4	p.Asp2005Valfs*34	p.D2005Vfs*34	Frameshift	Not calculated	Pathogenic	Not reported	NA	NA	(Silva et al., 2014)	10.1186/1471-2350-15-55
BRCA2	13		29	Brazil	NA	rs1057518637	c.2266C>T	p.Gln756Ter	p.Q756*	Nonsense	Not calculated	Pathogenic	Not reported	NA	NA	(Alemar et al., 2017)	10.1371/journal.pone.0187630
BRCA2	13	F343	35	Chile	NA	rs11571658	c.6275_6276delTT/6503_6504delTT	p.L2092fs	p.L2092fs	Frameshift	Not calculated	Pathogenic	Not reported	NA	NA	(Gonzalez-Hormazabal et al., 2011)	10.1007/s10549-010-1170-y
BRCA2	13	33	44	Colombia	NA	rs11571658	c.6275_6276delTT/6503delTT	p.Leu2092Profs	p.L2092Pfs	FrameShift	Not calculated	Pathogenic	Pathogenicity not defined	COSV99061623	Breast	(Torres et al., 2007)	10.1007/s10549-006-9370-1
BRCA2	13	CM019	46	Venezuela	NA	rs11571769	c.8851G>A/9079G>A	p.A2951T	p.A2951T	Missense	Not calculated	Benign	Pathogenicity not defined	COSV66463542	Prostate and Soft tissue	(Lara et al., 2012)	10.4067/S0716-97602012000200003
BRCA2	13	5	33	Mexico	NA	rs11571769	c.8851G>A/G9079A	p.A2951T	p.A2951T	Missense	Not calculated	Benign	Pathogenic (0.98)	COSV66463542	Prostate and Soft tissue	(Calderón-Garcidueñas et al., 2005)	http://www.scielo.org.mx/scielo.php?pid=S0036-36342005000200004&script=sci_abstract&tlng=en
BRCA2	13	4	35	Mexico	NA	rs11571769	c.8851G>A/G9079A	p.A2951T	p.A2951T	Missense	Not calculated	Benign	Pathogenic (0.98)	COSV66463542	Prostate and Soft tissue	(Calderón-Garcidueñas et al., 2005)	http://www.scielo.org.mx/scielo.php?pid=S0036-36342005000200004&script=sci_abstract&tlng=en
BRCA2	13	8	34	Mexico	NA	rs11571833	c.9976A>T/10204A>T/A10204T	p.Lys3326*	p.K336*	Nonsense	Not calculated	Benign	Not reported	NA	NA	(Calderón-Garcidueñas et al., 2005)	http://www.scielo.org.mx/scielo.php?pid=S0036-36342005000200004&script=sci_abstract&tlng=en
BRCA2	13	33	44	Colombia	NA	rs11571833	c.9976A>T/10204A>T/A10204T	p.K3326X	p.K3326X	Nonsense	Not calculated	Benign	Neutral (0.04)	COSV66337127	Prostate, Skin, Soft tissue, and Breast	(Torres et al., 2007)	10.1007/s10549-006-9370-1
BRCA2	13	AB0034X	33	Argentina	NA	rs1555283184	c.3343delT	p.Ser1115Leufs	p.S1115Lfs	Frameshift	Not calculated	Pathogenic	Not reported	NA	NA	(Solano et al., 2017)	10.18632/oncotarget.10814.
BRCA2	13	AB0322	41	Argentina	NA	rs1555286052	c.7230delT	p.Phe2410Leufs	p.F2410Lfs	FrameShift	Not calculated	Pathogenic	Not reported	NA	NA	(Solano et al., 2017)	10.18632/oncotarget.10814.
BRCA2	13		38	Argentina	NA	rs1555286075	c.7308delC/c.7308del	p.Asn2436Lysfs*33	p.N2436Kfs*33	Deletion	Not calculated	Novel mutation	Not reported	NA	NA	(Solano et al., 2018)	10.3389/fonc.2018.00323
BRCA2	13		39	Brazil	NA	rs1555286296	c.7580_7583dupTAGG	p.Gly2529Argfs	p.G2529Rfs	Frameshift	Not calculated	Pathogenic	Not reported	NA	NA	(Alemar et al., 2017)	10.1371/journal.pone.0187630
BRCA2	13		42	Brazil	NA	rs1555286296	c.7580_7583dupTAGG	p.Gly2529Argfs	p.G2529Rfs	Frameshift	Not calculated	Pathogenic	Not reported	NA	NA	(Alemar et al., 2017)	10.1371/journal.pone.0187630
BRCA2	13	DL0117708	<40	Mexico	NA	rs1566260129	c.9545A>G	p.His3182Arg	H3182R	Missense	Not calculated	Uncertain significance	Not reported	NA	NA	(Gomez-Flores-Ramos et al., 2020)	10.20944/preprints202008.0718.v1
BRCA2	13	V3319	39	Mexico	NA	rs276174813	c.1796_1800delCTTAT	p.Ser599Terfs	p.S599*	Deletion	Not calculated	Pathogenic	Not reported	NA	NA	(Torres-Mejia et al., 2015)	10.1158/1055-9965.EPI-13-0980
BRCA2	13	AB0505	37	Argentina	NA	rs276174866	c.6209_6212delAAAG	p.Glu2070Valfs	p.E2070Vfs	Deletion	Not calculated	Pathogenic	Not reported	NA	NA	(Solano et al., 2017)	10.18632/oncotarget.10814.
BRCA2	13	V3269	43	Mexico	NA	rs276174873	c.6458C>T/6686delC	p.P2153L	p.P2153L	Missense	Not calculated	Conflicting interpretations	Neutral (0.08)	COSV66454309	Skin	(Torres-Mejia et al., 2015)	10.1158/1055-9965.EPI-13-0980
BRCA2	13	41	42	Colombia	NA	rs28897754	c.8850G>T/9078G>T	p.K2950N	p.K2950N	Missense	Not calculated	Conflicting interpretations	Pathogenic (0.86)	COSV66455693	Soft tissue and Breast	(Torres et al., 2007)	10.1007/s10549-006-9370-1
BRCA2	13		49	Brazil	NA	rs28897759	c.9371A>T	p.Asn3124Ile	p.N3124I	Missense	Not calculated	Pathogenic	Not reported	NA	NA	(Alemar et al., 2017)	10.1371/journal.pone.0187630
BRCA2	13		26	Brazil	NA	rs397507404	c.8488-1G>A	IVS19-1G>A	NA	Splicing	Not calculated	Pathogenic	Pathogenic (0.99)	COSV104430719	Ovary	(Fernandes et al., 2016)	10.18632/oncotarget.12610
BRCA2	13	382	47	Colombia	NA	rs397507637	c.2701delC	p.Ala902fs	p.A902fs	Deletion	Not calculated	Pathogenic	Not reported	NA	NA	(Torres et al., 2017)	10.1038/s41598-017-05056-y
BRCA2	13	AB0364	48	Argentina	NA	rs397507768	c.517G>T	p.Gly173Cys	p.G173C	Splicedefect	Not calculated	Not reported in Clinvar	Not reported	NA	NA	(Solano et al., 2017)	10.18632/oncotarget.10814.
BRCA2	13	AB0392	40	Argentina	NA	rs397507952	c.8021delA	p.Lys2674Argfs	p.K2674Rfs	FrameShift	Not calculated	Novel mutation	Pathogenicity not defined	COSV66454839	Large intestine	(Solano et al., 2017)	10.18632/oncotarget.10814.
BRCA2	13	SM-84	35	Brazil	NA	rs397507967	c.8195T>G/8423T>G	p.L2732X	p.L2732X	Nonsense	Not calculated	Pathogenic	Not reported	NA	NA	(Silva et al., 2014)	10.1186/1471-2350-15-55
BRCA2	13		43	Brazil	NA	rs397515636	c.3975_3978dupTGCT	p.Ala1327Cysfs	p.A1327Cfs	Frameshift	Not calculated	Pathogenic	Not reported	NA	NA	(Alemar et al., 2017)	10.1371/journal.pone.0187630
BRCA2	13		31	Uruguay	NA	rs398122622	c.9808delG	p.Ala3270Profs	p.A3270Pfs	Deletion	Not calculated	Pathogenic	Not reported	NA	NA	(Valle et al., 2017)	http://revista.rmu.org.uy/ojsrmu311/index.php/rmu/article/view/112
BRCA2	13		44	Brazil	NA	rs41293497	c.5682C>G	p.Tyr1894Ter	p.Y1894*	Nonsense	Not calculated	Pathogenic	Neutral (0.06)	COSV99061686	Breast	(Fernandes et al., 2016)	10.18632/oncotarget.12610
BRCA2	13		29	Brazil	NA	rs41293497	c.5682C>G	p.Tyr1894Ter	p.Y1894*	Nonsense	Not calculated	Pathogenic	Neutral (0.06)	COSV99061686	Breast	(Alemar et al., 2017)	10.1371/journal.pone.0187630
BRCA2	13	AB0031	38	Argentina	NA	rs41293511	c.8167G>C	p.Asp2723His	p.D2723H	Missense	Not calculated	Conflicting interpretations	Not reported	NA	NA	(Solano et al., 2017)	10.18632/oncotarget.10814.
BRCA2	13	MO-13	32	Brazil	NA	rs4987047	c.8830A>T/9058A>T	p.I2944F	p.I2944F	Missense	Not calculated	Benign	Pathogenic (0.73)	COSV104701290	Prostate and Breast	(Silva et al., 2014)	10.1186/1471-2350-15-55
BRCA2	13	SM-05	36	Brazil	NA	rs4987047	c.8830A>T/9058A>T	p.I2944F	p.I2944F	Missense	Not calculated	Benign	Pathogenic (0.73)	COSV104701290	Prostate and Breast	(Silva et al., 2014)	10.1186/1471-2350-15-55
BRCA2	13	SM-43	47	Brazil	NA	rs56179254	c.9085G>A/9313G>A	p.A3029T	p.A3029T	Missense	Not calculated	Conflicting interpretations	Pathogenic (0.97)	COSV66453328	Central nervous system	(Silva et al., 2014)	10.1186/1471-2350-15-55
BRCA2	13	11	33	Mexico	NA	rs56309455	c.10121C>T/C10349T	p.Thr3374Ile	p.T3374I	Missense	Not calculated	Benign	Neutral (0.09)	COSV66337402	Ovary	(Calderón-Garcidueñas et al., 2005)	http://www.scielo.org.mx/scielo.php?pid=S0036-36342005000200004&script=sci_abstract&tlng=en
BRCA2	13	SM-80	42	Brazil	NA	rs587779357	c.1096T>G/1324T>G	p.L366V	p.L366V	Missense	Not calculated	Conflicting interpretations	Not reported	NA	NA	(Silva et al., 2014)	10.1186/1471-2350-15-55
BRCA2	13	DL0117714	<40	Mexico	NA	rs587782713	c.1714G>C	p.Val572Leu	V572L	Missense	Not calculated	Uncertain significance	Not reported	NA	NA	(Gomez-Flores-Ramos et al., 2020)	10.20944/preprints202008.0718.v1
BRCA2	13	F46	42	Chile	NA	rs786204278	c.6174delT	p.S1982fs	p.S1982fs	Frameshift	Not calculated	Pathogenic	Not reported	NA	NA	(Gonzalez-Hormazabal et al., 2011)	10.1007/s10549-010-1170-y
BRCA2	13	F46	42	Chile	NA	rs786204278	c.6174delT	p.Ser1982fs(Stop 2003)	p.S1982fs	Frameshift	Not calculated	Pathogenic	Not reported	NA	NA	(Jara et al., 2006)	10.1016/j.cancergencyto.2005.08.019
BRCA2	13	SM-08	33	Brazil	NA	rs786204278	c.6174delT	p.Ser1982Argfs*22	p.S1982Rfs*22	Frameshift	Not calculated	Pathogenic	Not reported	NA	NA	(Silva et al., 2014)	10.1186/1471-2350-15-55
BRCA2	13	30288	44	Cuba	NA	rs79728106	c.3166C>T/3394C>T	p.Gln1056Ter	p.Q1056*	Nonsense	Not calculated	Pathogenic	Not reported	NA	NA	(Rodriguez et al., 2008)	10.1007/s10689-008-9187-7
BRCA2	13	AB0043K	41	Argentina	NA	rs80358435	c.145G>T/373G>T	p.Glu49Ter	p.E49*	Nonsense	Not calculated	Pathogenic	Not reported	NA	NA	(Solano et al., 2017)	10.18632/oncotarget.10814.
BRCA2	13		44	Uruguay	NA	rs80358544	c.2979G>A	p.Trp993Ter	p.W993*	Polymorphism	Not calculated	Pathogenic	Not reported	NA	NA	(Valle et al., 2017)	http://revista.rmu.org.uy/ojsrmu311/index.php/rmu/article/view/112
BRCA2	13		48	Brazil	NA	rs80358547	c.2T>G	p.Met1Arg	p.M1R	Missense	Not calculated	Pathogenic	Not reported	NA	NA	(Fernandes et al., 2016)	10.18632/oncotarget.12610
BRCA2	13	M1349	39	Mexico	NA	rs80358659	c.4111C>T	p.Q1371X	p.Q1371X	Nonsense	Not calculated	Pathogenic	Not reported	NA	NA	(Torres-Mejia et al., 2015)	10.1158/1055-9965.EPI-13-0980
BRCA2	13		39	Uruguay	NA	rs80358663	c.4222C>T	p.Gln1408Ter	p.Q1408*	Nonsense	Not calculated	Pathogenic	Not reported	NA	NA	(Valle et al., 2017)	http://revista.rmu.org.uy/ojsrmu311/index.php/rmu/article/view/112
BRCA2	13	SM-97	46	Brazil	NA	rs80358694	c.4599A>C/4827A>C	p.K1533N	p.K1533N	Missense	Not calculated	Conflicting interpretations	Neutral (0.29)	COSV66458267	Haematopoietic and lymphoid	(Silva et al., 2014)	10.1186/1471-2350-15-55
BRCA2	13		37,5	Uruguay	NA	rs80358711	c.4889C>G/5117C>G	p.Ser1630Ter	p.S1630*	Polymorphism	Not calculated	Pathogenic	Pathogenicity not defined	COSV66461715	Breast	(Valle et al., 2017)	http://revista.rmu.org.uy/ojsrmu311/index.php/rmu/article/view/112
BRCA2	13	AB0034	40	Argentina	NA	rs80358840	c.6037A>T	p.Lys1213Stop	p.K1213*	Nonsense	Not calculated	Pathogenic	Not reported	NA	NA	(Solano et al., 2017)	10.18632/oncotarget.10814.
BRCA2	13	AB0575	44	Argentina	NA	rs80358840	c.6037A>T	p.Lys1213Stop	p.K1213*	Nonsense	Not calculated	Pathogenic	Not reported	NA	NA	(Solano et al., 2017)	10.18632/oncotarget.10814.
BRCA2	13	AB0222	48	Argentina	NA	rs80358840	c.6037A>T	p.Lys1213Stop	p.K1213*	Nonsense	Not calculated	Pathogenic	Not reported	NA	NA	(Solano et al., 2017)	10.18632/oncotarget.10814.
BRCA2	13	F145	44	Chile	NA	rs80358866	c.6290C>T/6518C>T	p.T2097M	p.T2097M	Missense	Not calculated	Benign	Neutral (0.14)	COSV66463628	Prostate and Urinary tract	(Gonzalez-Hormazabal et al., 2011)	10.1007/s10549-010-1170-y
BRCA2	13		36,6	Uruguay	NA	rs80358892	c.6645C>G	p.Tyr2215Ter	p.Y2215*	Polymorphism	Not calculated	Pathogenic	Not reported	NA	NA	(Valle et al., 2017)	http://revista.rmu.org.uy/ojsrmu311/index.php/rmu/article/view/112
BRCA2	13	10	33	Mexico	NA	rs80358912	c.6877T>C/7105T>C	p.F2293L	p.F2293L	Missense	Not calculated	Conflicting interpretations	Not reported	NA	NA	(Calderón-Garcidueñas et al., 2005)	http://www.scielo.org.mx/scielo.php?pid=S0036-36342005000200004&script=sci_abstract&tlng=en
BRCA2	13	41	34	Mexico	NA	rs80358912	c.6877T>C/7105T>C	p.F2293L	p.F2293L	Missense	Not calculated	Conflicting interpretations	Not reported	NA	NA	(Ruiz-Flores et al., 2002)	10.1002/humu.9084
BRCA2	13		34	Brazil	NA	rs80358946	c.7180A>T	p.Arg2394Ter	p.R2394*	Nonsense	Not calculated	Pathogenic	Not reported	NA	NA	(Fernandes et al., 2016)	10.18632/oncotarget.12610
BRCA2	13	AB0080X	45	Argentina	NA	rs80359011	c.7857G>A	p.Trp2619Ter	p.W2619*	Nonsense	Not calculated	Pathogenic	Not reported	NA	NA	(Solano et al., 2017)	10.18632/oncotarget.10814.
BRCA2	13	F231	37	Chile	NA	rs80359060	c.8153T>C/8381T>C	p.I2718T	p.I2718T	Missense	Not calculated	Novel mutation	Not reported	NA	NA	(Gonzalez-Hormazabal et al., 2011)	10.1007/s10549-010-1170-y
BRCA2	13		40	Brazil	NA	rs80359076	c.8351G>A	p.Arg2784Gln	p.R2784Q	Missense	Not calculated	Novel mutation	Not reported	NA	NA	(Fernandes et al., 2016)	10.18632/oncotarget.12610
BRCA2	13	9	30	Mexico	NA	rs80359082	c.8377G>A/8605G>A	p.Gly2793Arg	p.G2793R	Missense	Not calculated	Pathogenic/Likely pathogenic	Not reported	NA	NA	(Calderón-Garcidueñas et al., 2005)	http://www.scielo.org.mx/scielo.php?pid=S0036-36342005000200004&script=sci_abstract&tlng=en
BRCA2	13	64	31	Mexico	NA	rs80359082	c.8377G>A/8605G>A	p.Gly2793Arg	p.G2793R	Missense	Not calculated	Pathogenic/Likely pathogenic	Not reported	NA	NA	(Ruiz-Flores et al., 2002)	10.1002/humu.9084
BRCA2	13	AB0530	25	Argentina	NA	rs80359140	c.8878C>T	p.Gln2960Ter	p.Q2960*	Nonsense	Not calculated	Pathogenic	Not reported	NA	NA	(Solano et al., 2017)	10.18632/oncotarget.10814.
BRCA2	13	AB0077E	42	Argentina	NA	rs80359140	c.8878C>T	p.Gln2960Ter	p.Q2960*	Nonsense	Not calculated	Pathogenic	Not reported	NA	NA	(Solano et al., 2017)	10.18632/oncotarget.10814.
BRCA2	13		39,5	Uruguay	NA	rs80359140	c.8878C>T	p.Gln2960Ter	p.Q2960*	Polymorphism	Not calculated	Pathogenic	Not reported	NA	NA	(Valle et al., 2017)	http://revista.rmu.org.uy/ojsrmu311/index.php/rmu/article/view/112
BRCA2	13		43	Brazil	NA	rs80359152	c.9004G>A/9232G>A	p.Glu3002Lys	p.E3002K	Missense	Not calculated	Conflicting interpretations	Pathogenic (0.99)	COSV66460189	Urinary track and Breast	(Alemar et al., 2017)	10.1371/journal.pone.0187630
BRCA2	13	38	35	Colombia	NA	rs80359214	c.93G>A/321G>A	p.W31X	p.W31X	Nonsense	Not calculated	Pathogenic	Pathogenic (0.97)	COSV66451214	Skin	(Torres et al., 2007)	10.1007/s10549-006-9370-1
BRCA2	13	DL0117717	<40	Mexico	NA	rs80359218	c.9454G>A	p.Glu3152Lys	E3152K	Missense	Not calculated	Conflicting interpretations	Not reported	NA	NA	(Gomez-Flores-Ramos et al., 2020)	10.20944/preprints202008.0718.v1
BRCA2	13	SM-46	32	Brazil	NA	rs80359222	c.9481A>T/9709A>T	p.K3161X	p.K3161X	Nonsense	Not calculated	Pathogenic	Not reported	NA	NA	(Silva et al., 2014)	10.1186/1471-2350-15-55
BRCA2	13		34	Brazil	NA	rs80359264	c.1138delA	p.Ser380Valfs	p.S380Vfs	Frameshift	Not calculated	Pathogenic	Not reported	NA	NA	(Alemar et al., 2017)	10.1371/journal.pone.0187630
BRCA2	13		37	Brazil	NA	rs80359264	c.1138delA	p.Ser380Valfs	p.S380Vfs	Frameshift	Not calculated	Pathogenic	Not reported	NA	NA	(Alemar et al., 2017)	10.1371/journal.pone.0187630
BRCA2	13		49	Brazil	NA	rs80359264	c.1138delA	p.Ser380Valfs*19	p.S380Vfs*19	Frameshift	Not calculated	Pathogenic	Not reported	NA	NA	(Fernandes et al., 2016)	10.18632/oncotarget.12610
BRCA2	13	34	31	Uruguay	NA	rs80359283	c.1389_1390delAG/1617delAG	p.Val464Glyfs	p.V464Gfs	Frameshift	Not calculated	Pathogenic	Pathogenicity not defined	COSV104701258	Prostate	(Delgado et al., 2011)	10.1007/s10549-010-1320-2
BRCA2	13	291	30	Colombia	NA	rs80359303	c.1763_1766delATAA	p.Asn588fs	p.N588fs	Deletion	Not calculated	Pathogenic	Not reported	NA	NA	(Torres et al., 2017)	10.1038/s41598-017-05056-y
BRCA2	13	409	43	Colombia	NA	rs80359303	c.1763_1766delATAA	p.Asn588fs	p.N588fs	Deletion	Not calculated	Pathogenic	Not reported	NA	NA	(Torres et al., 2017)	10.1038/s41598-017-05056-y
BRCA2	13		26	Brazil	NA	rs80359350	c.2805_2808delTAAA	p.Ala938Profs	p.A938Pfs	Frameshift	Not calculated	Pathogenic	Pathogenicity not defined	COSV66447416	Ovary, Prostate and Haematopoietic and lymphoid	(Alemar et al., 2017)	10.1371/journal.pone.0187630
BRCA2	13	51551	45	Peru	NA	rs80359351	c.2808_2811del/c.2806_2809delAAAC/3036del4/3034del4/c.2808_2811delACAA/3036_3039delACAA	p.Ala938Profs	p.A938Pfs	Frameshift	Not calculated	Pathogenic	Pathogenicity not defined	COSV66447416	Ovary, Prostate and Haematopoietic and lymphoid	(Abugattas et al., 2015)	10.1111/cge.12505
BRCA2	13		47,8	Uruguay	NA	rs80359351	c.2808_2811del/c.2806_2809delAAAC/3036del4/3034del4/c.2808_2811delACAA/3036_3039delACAA	p.Ala938Profs	p.A938Pfs	Frameshift	Not calculated	Pathogenic	Pathogenicity not defined	COSV66447416	Ovary, Prostate and Haematopoietic and lymphoid	(Valle et al., 2017)	http://revista.rmu.org.uy/ojsrmu311/index.php/rmu/article/view/112
BRCA2	13		44	Brazil	NA	rs80359351	c.2808_2811del/c.2806_2809delAAAC/3036del4/3034del4/c.2808_2811delACAA/3036_3039delACAA/2808_2811del4/3034del4	p.Ala938Profs	p.A938Pfs	Frameshift	Not calculated	Pathogenic	Pathogenicity not defined	COSV66447416	Ovary, Prostate and Haematopoietic and lymphoid	(Alemar et al., 2017)	10.1371/journal.pone.0187630
BRCA2	13		34	Brazil	NA	rs80359351	c.2808_2811del/c.2806_2809delAAAC/3036del4/3034del4/c.2808_2811delACAA/3036_3039delACAA/2808_2811del4/3034del4	p.Ala938Profs*21	p.A938Pfs*21	Frameshift	Not calculated	Pathogenic	Pathogenicity not defined	COSV66447416	Ovary, Prostate and Haematopoietic and lymphoid	(Fernandes et al., 2016)	10.18632/oncotarget.12610
BRCA2	13	AB0137	37	Argentina	NA	rs80359351	c.2808_2811del/c.2806_2809delAAAC/3036del4/3034del4/c.2808_2811delACAA/3036_3039delACAA/2808_2811del4/3034del4	p.Ala938Profs	p.A938Pfs	Frameshift	Not calculated	Pathogenic	Pathogenicity not defined	COSV66447416	Ovary, Prostate and Haematopoietic and lymphoid	(Solano et al., 2017)	10.18632/oncotarget.10814.
BRCA2	13	AB0267	40	Argentina	NA	rs80359351	c.2808_2811del/c.2806_2809delAAAC/3036del4/3034del4/c.2808_2811delACAA/3036_3039delACAA/2808_2811del4/3034del4	p.Ala938Profs	p.A938Pfs	Frameshift	Not calculated	Pathogenic	Pathogenicity not defined	COSV66447416	Ovary, Prostate and Haematopoietic and lymphoid	(Solano et al., 2017)	10.18632/oncotarget.10814.
BRCA2	13	AB0244	41	Argentina	NA	rs80359351	c.2808_2811del/c.2806_2809delAAAC/3036del4/3034del4/c.2808_2811delACAA/3036_3039delACAA/2808_2811del4/3034del4	p.Ala938Profs	p.A938Pfs	Frameshift	Not calculated	Pathogenic	Pathogenicity not defined	COSV66447416	Ovary, Prostate and Haematopoietic and lymphoid	(Solano et al., 2017)	10.18632/oncotarget.10814.
BRCA2	13	M2251	48	Mexico	NA	rs80359351	c.2808_2811del/c.2806_2809delAAAC/3036del4/3034del4/c.2808_2811delACAA/3036_3039delACAA/2808_2811del4/3034del4	p.Ala938Profs	p.A938Pfs	Frameshift	Not calculated	Pathogenic	Pathogenicity not defined	COSV66447416	Ovary, Prostate and Haematopoietic and lymphoid	(Torres-Mejia et al., 2015)	10.1158/1055-9965.EPI-13-0980
BRCA2	13	CM046	35	Venezuela	NA	rs80359351	c.2808_2811del/c.2806_2809delAAAC/3036del4/3034del4/c.2808_2811delACAA/3036_3039delACAA/2808_2811del4/3034del4/c.3034del4(AAAC)	p.Ala938Profs*21	p.A938Pfs*21	Frameshift	Not calculated	Pathogenic	Not reported	NA	NA	(Lara et al., 2012)	10.4067/S0716-97602012000200003
BRCA2	13	SM-104	32	Brazil	NA	rs80359351	c.2808_2811del/c.2806_2809delAAAC/3036del4/3034del4/c.2808_2811delACAA/3036_3039delACAA/2808_2811del4/3034del4/c.3034del4(AAAC)	p.Ala938Profs*21	p.A938Pfs*21	Frameshift	Not calculated	Pathogenic	Pathogenicity not defined	COSV66447416	Ovary, Prostate and Haematopoietic and lymphoid	(Silva et al., 2014)	10.1186/1471-2350-15-55
BRCA2	13		49	Brazil	NA	rs80359406	c.3858_3860delAAA	p.Lys1286del	p.K1286del	In frame deletion	Not calculated	Pathogenic	Not reported	NA	NA	(Fernandes et al., 2016)	10.18632/oncotarget.12610
BRCA2	13	3	39	Uruguay	NA	rs80359429	c.4131_4132ins6/4359ins6/c.4131_4132insTGAGGA	p.Thr1378_Gly1712delinsTer	NA	Deletion	Not calculated	Pathogenic	Not reported	NA	NA	(Delgado et al., 2011)	10.1007/s10549-010-1320-2
BRCA2	13		39	Brazil	NA	rs80359468	c.4829_4830delTG	p.Val1610Glyfs	p.V1610Gfs	Frameshift	Not calculated	Pathogenic	Not reported	NA	NA	(Alemar et al., 2017)	10.1371/journal.pone.0187630
BRCA2	13		31	Brazil	NA	rs80359479	c.5073dupA	p.Trp1692Metfs*3	p.T1692Mfs*3	Frameshift	Not calculated	Pathogenic	Not reported	NA	NA	(Fernandes et al., 2016)	10.18632/oncotarget.12610
BRCA2	13	CM88	33	Costa Rica	NA	rs80359505	c.5303_5304delTT/5531delTT	p.Leu1768Argfs	p.L1768Rfs	Deletion	Not calculated	Pathogenic	Not reported	NA	NA	(Gutiérrez et al., 2012)	10.1111/j.1399-0004.2011.01774.x
BRCA2	13	CM10	40	Costa Rica	NA	rs80359505	c.5303_5304delTT/5531delTT	p.Leu1768Argfs	p.L1768Rfs	Deletion	Not calculated	Pathogenic	Not reported	NA	NA	(Gutiérrez et al., 2012)	10.1111/j.1399-0004.2011.01774.x
BRCA2	13	9	43	Uruguay	NA	rs80359507	c.5351dupA/5579insA	p.Asn1784Lysfs	p.N1784Kfs	Deletion	Not calculated	Pathogenic	Pathogenicity not defined	COSV66452194	Stomach, Endometrium, Large intestine and Biliary tract	(Delgado et al., 2011)	10.1007/s10549-010-1320-2
BRCA2	13	AB0160	33	Argentina	NA	rs80359507	c.5351dupA/5579insA	p.Asn1784Thrfs*7	p.N1784Kfs*7	Duplication	Not calculated	Pathogenic	Not reported	NA	NA	(Solano et al., 2017)	10.18632/oncotarget.10814.
BRCA2	13	M1911	42	Mexico	NA	rs80359519	c.5542delA	p.Ser1848Valfs	p.S1848Vfs	Deletion	Not calculated	Pathogenic	Not reported	NA	NA	(Torres-Mejia et al., 2015)	10.1158/1055-9965.EPI-13-0980
BRCA2	13	32259	37	Colombia	NA	rs80359525	c.5616_5620delAGTAA/5844del5	p.Lys1872Asnfs*2	p.K1872Nfs*2	Microsatellite	Not calculated	Pathogenic	Not reported	NA	NA	(Hernández et al., 2014)	10.1186/1897-4287-12-11
BRCA2	13		39	Brazil	NA	rs80359526	c.5621_5624delTTAA	p.Ile1874Argfs	p.I1874Rfs	Frameshift	Not calculated	Pathogenic	Not reported	NA	NA	(Alemar et al., 2017)	10.1371/journal.pone.0187630
BRCA2	13	AB0092	31	Argentina	NA	rs80359527	c.5681dupA	p.Tyr1894Ter	p.Y1894*	Duplication	Not calculated	Pathogenic	Not reported	NA	NA	(Solano et al., 2017)	10.18632/oncotarget.10814.
BRCA2	13	AB92	31	Argentina	NA	rs80359527	c.5681dupA/5909insA	p.Tyr1894Terfs	p.Y1894*fs	Truncating	Not calculated	Pathogenic	Not reported	NA	NA	(Solano et al., 2012)	10.1186/2193-1801-1-20
BRCA2	13	26243	48	Brazil	NA	rs80359550	c.5946delT/6174delT/c.5946_5946delT/c.5946del	p.Ser1982Argfs*22	p.S1982Rfs*22	Deletion	Not calculated	Pathogenic	Not reported	NA	NA	(Gomes et al., 2007)	10.1007/s10549-006-9378-6
BRCA2	13	Fam 3	40	Peru	NA	rs80359550	c.5946delT/6174delT/c.5946_5946delT/c.5946del/6174delT/c.5946del	p.Ser1982Argfs*22	p.S1982Rfs*22	Deletion	Not calculated	Pathogenic	Not reported	NA	NA	(Buleje et al., 2017)	10.1002/mgg3.301
BRCA2	13	CM20	30	Costa Rica	NA	rs80359550	c.5946delT/6174delT/c.5946_5946delT/c.5946del/6174delT/c.5946del	p.Ser1982Argfs*22	p.S1982Rfs*22	Deletion	Not calculated	Pathogenic	Not reported	NA	NA	(Gutiérrez et al., 2012)	10.1111/j.1399-0004.2011.01774.x
BRCA2	13	AB43	32	Argentina	NA	rs80359550	c.5946delT/6174delT/c.5946_5946delT/c.5946del/6174delT/c.5946del	p.Ser1982Argfs*22	p.S1982Rfs*22	Truncating	Not calculated	Pathogenic	Not reported	NA	NA	(Solano et al., 2012)	10.1186/2193-1801-1-20
BRCA2	13	AB47	33	Argentina	NA	rs80359550	c.5946delT/6174delT/c.5946_5946delT/c.5946del/6174delT/c.5946del	p.Ser1982Argfs*22	p.S1982Rfs*22	Truncating	Not calculated	Pathogenic	Not reported	NA	NA	(Solano et al., 2012)	10.1186/2193-1801-1-20
BRCA2	13	AB95	36	Argentina	NA	rs80359550	c.5946delT/6174delT/c.5946_5946delT/c.5946del/6174delT/c.5946del	p.Ser1982Argfs*22	p.S1982Rfs*22	Truncating	Not calculated	Pathogenic	Not reported	NA	NA	(Solano et al., 2012)	10.1186/2193-1801-1-20
BRCA2	13	AB57	39	Argentina	NA	rs80359550	c.5946delT/6174delT/c.5946_5946delT/c.5946del/6174delT/c.5946del	p.Ser1982Argfs*22	p.S1982Rfs*22	Truncating	Not calculated	Pathogenic	Not reported	NA	NA	(Solano et al., 2012)	10.1186/2193-1801-1-20
BRCA2	13	AB69	45	Argentina	NA	rs80359550	c.5946delT/6174delT/c.5946_5946delT/c.5946del/6174delT/c.5946del	p.Ser1982Argfs*22	p.S1982Rfs*22	Truncating	Not calculated	Pathogenic	Not reported	NA	NA	(Solano et al., 2012)	10.1186/2193-1801-1-20
BRCA2	13	AB71	46	Argentina	NA	rs80359550	c.5946delT/6174delT/c.5946_5946delT/c.5946del/6174delT/c.5946del	p.Ser1982Argfs*22	p.S1982Rfs*22	Truncating	Not calculated	Pathogenic	Not reported	NA	NA	(Solano et al., 2012)	10.1186/2193-1801-1-20
BRCA2	13	AB74	48	Argentina	NA	rs80359550	c.5946delT/6174delT/c.5946_5946delT/c.5946del/6174delT/c.5946del	p.Ser1982Argfs*22	p.S1982Rfs*22	Truncating	Not calculated	Pathogenic	Not reported	NA	NA	(Solano et al., 2012)	10.1186/2193-1801-1-20
BRCA2	13	AB0013I	30	Argentina	NA	rs80359550	c.5946delT/6174delT/c.5946_5946delT/c.5946del/6174delT/c.5946del	p.Ser1982Argfs*22	p.S1982Rfs*22	Frameshift	Not calculated	Pathogenic	Pathogenicity not defined	COSV66447676	Breast, Pancreas and Upper aerodigestive tract	(Solano et al., 2017)	10.18632/oncotarget.10814.
BRCA2	13	AB0043	32	Argentina	NA	rs80359550	c.5946delT/6174delT/c.5946_5946delT/c.5946del/6174delT/c.5946del	p.Ser1982Argfs*22	p.S1982Rfs*22	Frameshift	Not calculated	Pathogenic	Pathogenicity not defined	COSV66447676	Breast, Pancreas and Upper aerodigestive tract	(Solano et al., 2017)	10.18632/oncotarget.10814.
BRCA2	13	AB0065S	32	Argentina	NA	rs80359550	c.5946delT/6174delT/c.5946_5946delT/c.5946del/6174delT/c.5946del	p.Ser1982Argfs*22	p.S1982Rfs*22	Frameshift	Not calculated	Pathogenic	Pathogenicity not defined	COSV66447676	Breast, Pancreas and Upper aerodigestive tract	(Solano et al., 2017)	10.18632/oncotarget.10814.
BRCA2	13	AB0047	33	Argentina	NA	rs80359550	c.5946delT/6174delT/c.5946_5946delT/c.5946del/6174delT/c.5946del	p.Ser1982Argfs*22	p.S1982Rfs*22	Frameshift	Not calculated	Pathogenic	Pathogenicity not defined	COSV66447676	Breast, Pancreas and Upper aerodigestive tract	(Solano et al., 2017)	10.18632/oncotarget.10814.
BRCA2	13	AB0095	36	Argentina	NA	rs80359550	c.5946delT/6174delT/c.5946_5946delT/c.5946del/6174delT/c.5946del	p.Ser1982Argfs*22	p.S1982Rfs*22	Frameshift	Not calculated	Pathogenic	Pathogenicity not defined	COSV66447676	Breast, Pancreas and Upper aerodigestive tract	(Solano et al., 2017)	10.18632/oncotarget.10814.
BRCA2	13	AB0418	36	Argentina	NA	rs80359550	c.5946delT/6174delT/c.5946_5946delT/c.5946del/6174delT/c.5946del	p.Ser1982Argfs*22	p.S1982Rfs*22	Frameshift	Not calculated	Pathogenic	Pathogenicity not defined	COSV66447676	Breast, Pancreas and Upper aerodigestive tract	(Solano et al., 2017)	10.18632/oncotarget.10814.
BRCA2	13	AB0057	39	Argentina	NA	rs80359550	c.5946delT/6174delT/c.5946_5946delT/c.5946del/6174delT/c.5946del	p.Ser1982Argfs*22	p.S1982Rfs*22	Frameshift	Not calculated	Pathogenic	Pathogenicity not defined	COSV66447676	Breast, Pancreas and Upper aerodigestive tract	(Solano et al., 2017)	10.18632/oncotarget.10814.
BRCA2	13	AB0022A	39	Argentina	NA	rs80359550	c.5946delT/6174delT/c.5946_5946delT/c.5946del/6174delT/c.5946del	p.Ser1982Argfs*22	p.S1982Rfs*22	Frameshift	Not calculated	Pathogenic	Pathogenicity not defined	COSV66447676	Breast, Pancreas and Upper aerodigestive tract	(Solano et al., 2017)	10.18632/oncotarget.10814.
BRCA2	13	AB0056G	45	Argentina	NA	rs80359550	c.5946delT/6174delT/c.5946_5946delT/c.5946del/6174delT/c.5946del	p.Ser1982Argfs*22	p.S1982Rfs*22	Frameshift	Not calculated	Pathogenic	Pathogenicity not defined	COSV66447676	Breast, Pancreas and Upper aerodigestive tract	(Solano et al., 2017)	10.18632/oncotarget.10814.
BRCA2	13	AB0069	45	Argentina	NA	rs80359550	c.5946delT/6174delT/c.5946_5946delT/c.5946del/6174delT/c.5946del	p.Ser1982Argfs*22	p.S1982Rfs*22	Frameshift	Not calculated	Pathogenic	Pathogenicity not defined	COSV66447676	Breast, Pancreas and Upper aerodigestive tract	(Solano et al., 2017)	10.18632/oncotarget.10814.
BRCA2	13	AB0071	46	Argentina	NA	rs80359550	c.5946delT/6174delT/c.5946_5946delT/c.5946del/6174delT/c.5946del	p.Ser1982Argfs*22	p.S1982Rfs*22	Frameshift	Not calculated	Pathogenic	Pathogenicity not defined	COSV66447676	Breast, Pancreas and Upper aerodigestive tract	(Solano et al., 2017)	10.18632/oncotarget.10814.
BRCA2	13	AB0037J	47	Argentina	NA	rs80359550	c.5946delT/6174delT/c.5946_5946delT/c.5946del/6174delT/c.5946del	p.Ser1982Argfs*22	p.S1982Rfs*22	Frameshift	Not calculated	Pathogenic	Pathogenicity not defined	COSV66447676	Breast, Pancreas and Upper aerodigestive tract	(Solano et al., 2017)	10.18632/oncotarget.10814.
BRCA2	13	AB0055K	47	Argentina	NA	rs80359550	c.5946delT/6174delT/c.5946_5946delT/c.5946del/6174delT/c.5946del	p.Ser1982Argfs*22	p.S1982Rfs*22	Frameshift	Not calculated	Pathogenic	Pathogenicity not defined	COSV66447676	Breast, Pancreas and Upper aerodigestive tract	(Solano et al., 2017)	10.18632/oncotarget.10814.
BRCA2	13	AB0042Y	47	Argentina	NA	rs80359550	c.5946delT/6174delT/c.5946_5946delT/c.5946del/6174delT/c.5946del	p.Ser1982Argfs*22	p.S1982Rfs*22	Frameshift	Not calculated	Pathogenic	Pathogenicity not defined	COSV66447676	Breast, Pancreas and Upper aerodigestive tract	(Solano et al., 2017)	10.18632/oncotarget.10814.
BRCA2	13	AB0074	48	Argentina	NA	rs80359550	c.5946delT/6174delT/c.5946_5946delT/c.5946del/6174delT/c.5946del	p.Ser1982Argfs*22	p.S1982Rfs*22	Frameshift	Not calculated	Pathogenic	Pathogenicity not defined	COSV66447676	Breast, Pancreas and Upper aerodigestive tract	(Solano et al., 2017)	10.18632/oncotarget.10814.
BRCA2	13	AB0504	48	Argentina	NA	rs80359550	c.5946delT/6174delT/c.5946_5946delT/c.5946del/6174delT/c.5946del	p.Ser1982Argfs*22	p.S1982Rfs*22	Frameshift	Not calculated	Pathogenic	Pathogenicity not defined	COSV66447676	Breast, Pancreas and Upper aerodigestive tract	(Solano et al., 2017)	10.18632/oncotarget.10814.
BRCA2	13	AB0531	28	Argentina	NA	rs80359554	c.6024dupG/6252insG	p.Gln2009Alafs	p.Q2009Afs	Duplication	Not calculated	Pathogenic	Not reported	NA	NA	(Solano et al., 2017)	10.18632/oncotarget.10814.
BRCA2	13	55	46	Colombia	NA	rs80359554	c.6024dupG/6252insG	p.Gln2009fs	p.Q2009fs	Duplication	Not calculated	Pathogenic	Not reported	NA	NA	(Torres et al., 2017)	10.1038/s41598-017-05056-y
BRCA2	13	399	44	Colombia	NA	rs80359557	c.6078_6079delAA	p.Glu2028fs	p.E2028fs	Deletion	Not calculated	Pathogenic	Not reported	NA	NA	(Torres et al., 2017)	10.1038/s41598-017-05056-y
BRCA2	13		38	Brazil	NA	rs80359584	c.6405_6409delCTTAA/c.6402_6406del/6630del5/6633del5	p.N2134fs/p.Asn2135Lysfs*3	p.N2134fs	Frameshift	Not calculated	Pathogenic	Not reported	NA	NA	(Alemar et al., 2017)	10.1371/journal.pone.0187630
BRCA2	13		41	Brazil	NA	rs80359584	c.6405_6409delCTTAA/c.6402_6406del/6630del5/6633del5	p.Asn2135Lysfs*2	p.N2135Kfs*2	Frameshift	Not calculated	Pathogenic	Not reported	NA	NA	(Fernandes et al., 2016)	10.18632/oncotarget.12610
BRCA2	13	26260	32	Brazil	NA	rs80359584	c.6405_6409delCTTAA/c.6402_6406del/6630del5/6633del5	p.N2134fs/p.Asn2135Lysfs*3	p.N2134fs	Frameshift	Not calculated	Pathogenic	Not reported	NA	NA	(Gomes et al., 2007)	10.1007/s10549-006-9378-6
BRCA2	13		49	Brazil	NA	rs80359604	c.658_659delGT	p.Val220Ilefs*4	p.V220Ifs*4	Frameshift	Not calculated	Pathogenic	Not reported	NA	NA	(Fernandes et al., 2016)	10.18632/oncotarget.12610
BRCA2	13	AB0412	45	Argentina	NA	rs80359604	c.658_659delGT	p.Val220Ilefs*4	p.V220Ifs*4	Frameshift	Not calculated	Pathogenic	Not reported	NA	NA	(Solano et al., 2017)	10.18632/oncotarget.10814.
BRCA2	13	AB0008X	24	Argentina	NA	rs80359630	c.700delT	p.Ser234Profs	p.S234Pfs	Frameshift	Not calculated	Pathogenic	Not reported	NA	NA	(Solano et al., 2017)	10.18632/oncotarget.10814.
BRCA2	13	AB0326	39	Argentina	NA	rs80359630	c.700delT	p.Ser234Profs	p.S234Pfs	Frameshift	Not calculated	Pathogenic	Not reported	NA	NA	(Solano et al., 2017)	10.18632/oncotarget.10814.
BRCA2	13	AB0098	31	Argentina	NA	rs80359638	c.7110dupA	p.Ser2371Ilefs	p.S2371Ifs	Frameshift	Not calculated	Pathogenic	Not reported	NA	NA	(Solano et al., 2017)	10.18632/oncotarget.10814.
BRCA2	13	F93	26	Chile	NA	rs80359694	c.8068_8069delGT /8296delGT	p.V2690fs	p.V2690fs	Frameshift	Not calculated	Novel mutation	Not reported	NA	NA	(Gonzalez-Hormazabal et al., 2011)	10.1007/s10549-010-1170-y
BRCA2	13	AB0265	35	Argentina	NA	rs80359741	c.9026_9030delATCAT/9254del5/ c.9026_9030del	p.Tyr3009Serfs/p.Tyr3009Serfs*7	p.Y3009Sfs*7	FrameShift	Not calculated	Pathogenic	Not reported	NA	NA	(Solano et al., 2017)	10.18632/oncotarget.10814.
BRCA2	13		35	Argentina	NA	rs80359741	c.9026_9030delATCAT/9254del5/ c.9026_9030del	p.Tyr3009Serfs/p.Tyr3009Serfs*7	p.Y3009Sfs*7	Deletion	Not calculated	Pathogenic	Not reported	NA	NA	(Solano et al., 2018)	10.3389/fonc.2018.00323
BRCA2	13		35	Brazil	NA	rs80359759	c.9401delG	p.Gly3134Alafs*29	p.G3134Afs*29	Frameshift	Not calculated	Pathogenic	Not reported	NA	NA	(Fernandes et al., 2016)	10.18632/oncotarget.12610
BRCA2	13	AB0085X	32	Argentina	NA	rs81002812	c.8755-1G>A	IVS21-1G>A	NA	Splice acceptor	Not calculated	Pathogenic	Not reported	NA	NA	(Solano et al., 2017)	10.18632/oncotarget.10814.
BRCA2	13	AB0314	37	Argentina	NA	rs864622401	c.4740_4741dupTG	p.Glu1581Valfs	p.E1581Vfs	Frameshift	Not calculated	Pathogenic	Not reported	NA	NA	(Solano et al., 2017)	10.18632/oncotarget.10814.
BRCA2	13	AB0314	41	Argentina	NA	rs864622401	c.4740_4741dupTG	p.Glu1581Valfs	p.E1581Vfs	Frameshift	Not calculated	Pathogenic	Not reported	NA	NA	(Solano et al., 2017)	10.18632/oncotarget.10814.
BRCA2	13	AB0376	39	Argentina	NA	rs876659222	c.7426_7428delGAA	p.Glu2476del	p.E2476del	In frame deletion	Not calculated	Uncertain significance	Not reported	NA	NA	(Solano et al., 2017)	10.18632/oncotarget.10814.
BRCA2	13	AB0384	36	Argentina	NA	rs886040557	c.4963delT	p.Tyr1655Thrfs	p.Y1655T*	Frameshift	Not calculated	Pathogenic	Not reported	NA	NA	(Solano et al., 2017)	10.18632/oncotarget.10814.
BRCA2	13	282	34	Colombia	NA	rs886040634	c.6082_6083delGA	p.Glu2028fs	p.E2028fs	Microsatellite	Not calculated	Pathogenic	Not reported	NA	NA	(Torres et al., 2017)	10.1038/s41598-017-05056-y
BRCA2	13		38	Brazil	NA	rs886040738	c.7987delG	p.Glu2663Lysfs	p.E2663Kfs	Frameshift	Not calculated	Pathogenic	Not reported	NA	NA	(Alemar et al., 2017)	10.1371/journal.pone.0187630
BRCA2	13		31	Brazil	NA	rs886040738	c.7987delG	p.Glu2663Lysfs*10	p.E2663Kfs*10	Frameshift	Not calculated	Pathogenic	Not reported	NA	NA	(Fernandes et al., 2016)	10.18632/oncotarget.12610
BRCA2	13		47	Brazil	NA	rs886040940	c.7618-2A>G	NA	NA	Polymorphisms	Not calculated	Novel mutation	Not reported	NA	NA	(Alemar et al., 2017)	10.1371/journal.pone.0187630
BRCA2	13	0055	45	Colombia	NA		deletion exon 1-14	NA	NA	NA	Not calculated	Not reported in Clinvar	Not reported	NA	NA	(Torres et al., 2017)	10.1038/s41598-017-05056-y
BRCA2	13	1465	47	Colombia	NA		deletion exon 1-14	NA	NA	NA	Not calculated	Not reported in Clinvar	Not reported	NA	NA	(Torres et al., 2017)	10.1038/s41598-017-05056-y
BRCA2	13	A18	21	Argentina	Luminal A	rs2126042	c.681+56C>T	IVS8	NA	Polymorphism	Not calculated	Benign	Neutral (0.04)	COSV66457755	Meninges and Haematopoietic and lymphoid	(Aceto et al., 2010)	10.1007/s10549-009-0596-6
BRCA2	13	VII	<40	Mexico	Luminal A	rs397507357	c.5631del	p.Asn1877fs	NA	Frameshift	Not calculated	Pathogenic	Not reported	NA	NA	(Gomez-Flores-Ramos et al., 2020)	10.20944/preprints202008.0718.v1
BRCA2	13	IV	<40	Mexico	Luminal A	rs80359519	c.5542del	Ser1848fs	S184fs	FrameShift	Not calculated	Pathogenic	Not reported	NA	NA	(Gomez-Flores-Ramos et al., 2020)	10.20944/preprints202008.0718.v1
BRCA2	13	VI	<40	Mexico	Luminal B	rs80359656	c.7525dup	p.Ser2509fs	S2509fs	Frameshift	Not calculated	Pathogenic	Not reported	NA	NA	(Gomez-Flores-Ramos et al., 2020)	10.20944/preprints202008.0718.v1
BRCA2	13	MP018	23	Brazil	PR(+), HER2(+)	rs80358547	c.2T>G	p.Met1Arg	p.M1R	Missense	Not calculated	Pathogenic	Not reported	NA	NA	(Cipriano et al., 2018)	10.1007/s12282-018-00938-z
BRCA2	13	VIII	<40	Mexico	TNBC	rs397507422	c.9235del	p.Val3079fs	NA	Frameshift	Not calculated	Pathogenic	Not reported	NA	NA	(Gomez-Flores-Ramos et al., 2020)	10.20944/preprints202008.0718.v1
BRCA2	13	V	<40	Mexico	TNBC	rs41293511	c.8168A>G	p.Asp2723Gly	NA	Missense	Not calculated	Pathogenic	Not reported	NA	NA	(Gomez-Flores-Ramos et al., 2020)	10.20944/preprints202008.0718.v1
BRCA2	13	51085	46	Mexico	TNBC	rs80358494	c.2224C>T/2452C>T/2451C>T	p.Q742X	p.Q742X	Polymorphism	Not calculated	Pathogenic	Not reported	NA	NA	(Villarreal-Garza et al., 2015)	10.1007/s10549-015-3312-8.
CHEK2	22	DL0117675	<40	Mexico	NA	rs121908702	c.715G>A	p.Glu239Lys	E239K	Missense	Not calculated	Pathogenic	Pathogenic (0.73)	COSV60424940	Breast (37y.o.)	(Gomez-Flores-Ramos et al., 2020)	10.20944/preprints202008.0718.v1
CHEK2	22	MO-41	47	Brazil	NA	rs555607708	c.1100delC	p.Thr367Metfs*15	p.T367Mfs*15	Frameshift	Not calculated	Conflicting interpretations	Not reported	NA	NA	(Silva et al., 2014)	10.1186/1471-2350-15-55
CHEK2	22	DL0117709	<40	Mexico	NA	rs587782471	c.707T>C	p.Leu236Pro	L236P	Missense	Not calculated	Conflicting interpretations	Not reported	NA	NA	(Gomez-Flores-Ramos et al., 2020)	10.20944/preprints202008.0718.v1
CHEK2	22	DL0117913	<40	Mexico	NA	rs587782471	c.707T>C	p.Leu236Pro	L236P	Missense	Not calculated	Conflicting interpretations	Not reported	NA	NA	(Gomez-Flores-Ramos et al., 2020)	10.20944/preprints202008.0718.v1
CHEK2	22	DL0117759	<40	Mexico	NA	rs587782471	c.707T>C	p.Leu236Pro	L236P	Missense	Not calculated	Conflicting interpretations	Not reported	NA	NA	(Gomez-Flores-Ramos et al., 2020)	10.20944/preprints202008.0718.v1
CHEK2	22	DL0117765	<40	Mexico	NA	rs760118917	c.1246_1248del	p.Ile459del	I416del	Deletion	Not calculated	Uncertain significance	Not reported	NA	NA	(Gomez-Flores-Ramos et al., 2020)	10.20944/preprints202008.0718.v1
FANCM	14	DL0117748	<40	Mexico	NA	rs748823532	c.410T>C	p.Val137Ala	V137A	Missense	Not calculated	Not reported in ClinVar	Not reported	NA	NA	(Gomez-Flores-Ramos et al., 2020)	10.20944/preprints202008.0718.v1
FANCM	14	DL0117730	<40	Mexico	NA	rs753797551	NA	p.Ser78Tyr	S78Y	Missense	Not calculated	Not reported in ClinVar	Not reported	NA	NA	(Gomez-Flores-Ramos et al., 2020)	10.20944/preprints202008.0718.v1
MRE11A	11	DL0117743	<40	Mexico	NA	rs754542540	NA	p.Arg64Gln	R64Q	NA	Not calculated	Not reported in ClinVar	Not reported	NA	NA	(Gomez-Flores-Ramos et al., 2020)	10.20944/preprints202008.0718.v1
MRE11A	11	DL0117719	<40	Mexico	NA	rs771215537	c.1547A>T	p.Asp516Val	D516V	Missense	Not calculated	Not reported in ClinVar	Not reported	NA	NA	(Gomez-Flores-Ramos et al., 2020)	10.20944/preprints202008.0718.v1
NBN	8	DL0117744	<40	Mexico	NA	rs61754796	c.628C>A	p.Val210Phe	V210F	Missense	Not calculated	Conflicting intepretations	Neutral (0.04)	COSV99619337	Prostate, Colon	(Gomez-Flores-Ramos et al., 2020)	10.20944/preprints202008.0718.v1
PALB2	16	15	36	Colombia	HR(+), HER2(-)	rs180177100	c.1240C>T	p.Arg414Ter	p.R414*	Nonsense	Not calculated	Pathogenic	Pathogenic (0.97)	COSV55164397	Prostate	(Cock-Rada et al., 2018)	10.1007/s10689-017-0004-z
PALB2	16	X	<40	Mexico	Luminal A	rs764509489	c.2336C>G	p.Ser779Ter	S779*	Nonsense	Not calculated	Pathogenic	Not reported	NA	NA	(Gomez-Flores-Ramos et al., 2020)	10.20944/preprints202008.0718.v1
PALB2	16	IX	<40	Mexico	Luminal B	rs747148023	c.2411_2412delCT	p.Ser804fs	S804fs	Frameshift	Not calculated	Pathogenic/Likely pathogenic	Not reported	NA	NA	(Gomez-Flores-Ramos et al., 2020)	10.20944/preprints202008.0718.v1
PMS2	7	17	31	Colombia	HR(-), HER2(+)	rs121434629	c.137G>T	p.Ser46Ile	p.S46I	Missense	Not calculated	Likely pathogenic	Pathogenic (0.98)	COSV56151410	Large intestine and Thyroid	(Cock-Rada et al., 2018)	10.1007/s10689-017-0004-z
PMS2	7	DL0117715	<40	Mexico	NA	rs200513014	c.1004A>G	p.Asn335Ser	N335S	Missense	Not calculated	Conflicting intepretations	Pathogenic (0.96)	COSV99763736	Breast 62y.o.	(Gomez-Flores-Ramos et al., 2020)	10.20944/preprints202008.0718.v1
PMS2	7	DL0117916	<40	Mexico	NA	rs567102013	c.1080A>G	p.Ile360Met	I360M	Missense	Not calculated	Conflicting intepretations	Not reported	NA	NA	(Gomez-Flores-Ramos et al., 2020)	10.20944/preprints202008.0718.v1
RAD51	15		<50	Chile	NA	rs1801320	c.-98G>C	NA	NA	Polymorphism	Not calculated	Benign	Not reported	NA	NA	(Jara et al., 2007)	10.1016/j.cancergencyto.2007.05.024
RAD51C	17		45	Uruguay	NA	rs770637624	c.709C>T	p.Arg237Ter	p.R237*	Nonsense	Not calculated	Pathogenic	Pathogenic (0.78)	COSV61676239	Breast, Upper aerodigestive tract and Skin	(Valle et al., 2017)	http://revista.rmu.org.uy/ojsrmu311/index.php/rmu/article/view/112
RAD51C	17	DL0117698	<40	Mexico	NA	rs786202890	c.252G>T	p.Lys84Asn	K84N	Missense	Not calculated	Uncertain significance	Not reported	NA	NA	(Gomez-Flores-Ramos et al., 2020)	10.20944/preprints202008.0718.v1
RAD51C	17	XII	<40	Mexico	Luminal B	rs1598460710	c.519dup,T/TT	NA	NA	Frameshift	Not calculated	Pathogenic	Not reported	NA	NA	(Gomez-Flores-Ramos et al., 2020)	10.20944/preprints202008.0718.v1
RECQL	12	DL0117764	<40	Mexico	NA	rs754545736	c.73A>T	p.Ile25Phe	I25F	Missense	Not calculated	Uncertain significance	Not reported	NA	NA	(Gomez-Flores-Ramos et al., 2020)	10.20944/preprints202008.0718.v1
TP53	17	XI	<40	Mexico	Luminal B	rs28934578	c.524G>A	p.Arg175His	R175H	Missense	Possibly damaging	Pathogenic	Pathogenic (0.99)	COSV52661038	Large intestine, Breast, Oesophagus, Stomach and Central nervous system	(Gomez-Flores-Ramos et al., 2020)	10.20944/preprints202008.0718.v1
TP53	17		38	Uruguay	NA	rs28934576	c.818G>A	p.Arg273His	p.R273H	Missense	Possibly damaging	Pathogenic	Pathogenic (1.00)	COSV52660980	Large intestine, Breast, Lung, Central nervous system and Ovary	(Valle et al., 2017)	http://revista.rmu.org.uy/ojsrmu311/index.php/rmu/article/view/112
TP53	17		27	Mexico	ER(-), PR(-), HER2(+)	NA	c.273dupC	p.Pro92Alafs*57	P92Afs*57	Frameshift	Probably damaging	NA	Not reported	NA	NA	(Gallardo-Alvardo et al., 2019)	10.1186/s12885-019-5312-2
TP53	17		28	Mexico	ER(-), PR(-), HER2(+)	rs28934574	c.844C>T	p.Arg282Trp	R282W	Missense	Probably damaging	Pathogenic/Likely pathogenic	Pathogenic (0.99)	COSV52662048	Large intestine, breast, oesophagus, stomach, CNS,	(Gallardo-Alvardo et al., 2019)	10.1186/s12885-019-5312-2
TP53	17		27	Uruguay	NA	rs11540652	c.743G>A	p.Arg248Gln	p.R248Q	Missense	Probably damaging	Pathogenic	Pathogenic (0.98)	COSV52661580	Large intestine, Breast, Haematopoietic and lymphoid, Oesophagus and Upper aerodigestive tract	(Valle et al., 2017)	http://revista.rmu.org.uy/ojsrmu311/index.php/rmu/article/view/112
TP53	17		27	Mexico	ER(-), PR(-), HER2(+)	rs876660754	c.517G>A	p.Val173Met	V173M	Missense	Not calculated	Pathogenic	Pathogenic (0.99)	COSV52677795	Large intestine, breast, heamatopoietic, oesophagus, upper aerodigestive tract	(Gallardo-Alvardo et al., 2019)	10.1186/s12885-019-5312-2
TP53	17		24	Mexico	ER(-), PR(+), HER2(+)	NA	c.291delC	p.Pro98Leufs*25	P98Lfs*25	Frameshift	Not calculated	NA	Not reported	NA	NA	(Gallardo-Alvardo et al., 2019)	10.1186/s12885-019-5312-2
TP53	17		36	Mexico	ER(+), PR(+), HER2(+)	rs587780072	c.604C>T	p.Arg202Cys	R202C	Missense	Not calculated	Conflicting interpretations	Pathogenic (0.93)	COSV52891929	Prostate, lung, upper aerodigestive tract, urinary tract, endometrium	(Gallardo-Alvardo et al., 2019)	10.1186/s12885-019-5312-2
TP53	17	ID_2039	24	Brazil	HR(+), HER2(-)	rs587782620	c.427G>A	p.V143M	p.V143M	Missense	Not calculated	Conflicting interpretations	Pathogenic (0.83)	COSV52665025	Haematopoietic and lymphoid, Large intestine, Lung, Upper aerodigestive tract and Liver	(Carraro et al., 2013)	10.1371/journal.pone.0057581
TP53	17	1	19	Brazil	NA	rs121912664	c.1010G>A	p.Arg337His	p.R337H	Missense	Not calculated	Pathogenic	Pathogenicity not defined	COSV52691988	Liver, adrenal gland, prostate, pancreas, cervix	(Assumpção et al., 2008)	10.1186/1471-2407-8-357
TP53	17	2	29	Brazil	NA	rs121912664	c.1010G>A	p.Arg337His	p.R337H	Missense	Not calculated	Pathogenic	Pathogenicity not defined	COSV52691988	Liver, adrenal gland, prostate, pancreas, cervix	(Assumpção et al., 2008)	10.1186/1471-2407-8-357
TP53	17	3	44	Brazil	NA	rs121912664	c.1010G>A	p.Arg337His	p.R337H	Missense	Not calculated	Pathogenic	Pathogenicity not defined	COSV52691988	Liver, adrenal gland, prostate, pancreas, cervix	(Assumpção et al., 2008)	10.1186/1471-2407-8-357
TP53	17	MP003	45	Brazil	NA	rs121912664	c.1010G>A	p.Arg337His	p.R337H	Missense	Not calculated	Pathogenic	Pathogenicity not defined	COSV52691988	Liver, adrenal gland, prostate, pancreas, cervix	(Cipriano et al., 2018)	10.1007/s12282-018-00938-z
TP53	17		≤45	Brazil	NA	rs121912664	c.1010G>A	p.Arg337His	p.R337H	Missense	Not calculated	Pathogenic	Pathogenicity not defined	COSV52691988	Liver, adrenal gland, prostate, pancreas, cervix	(Giacomazzi et al., 2014)	10.1371/journal.pone.0099893
TP53	17		35	Brazil	NA	rs121912664	c.1010G>A	p.Arg337His	p.R337H	Missense	Not calculated	Pathogenic	Pathogenicity not defined	COSV52691988	Liver, adrenal gland, prostate, pancreas, cervix	(Gomes et al., 2012)	10.1007/s10549-006-9378-6
TP53	17		39	Brazil	NA	rs121912664	c.1010G>A	p.Arg337His	p.R337H	Missense	Not calculated	Pathogenic	Pathogenicity not defined	COSV52691988	Liver, adrenal gland, prostate, pancreas, cervix	(Gomes et al., 2012)	10.1007/s10549-006-9378-6
TP53	17		<46	Brazil	NA	rs121912664	c.1010G>A	p.Arg337His	p.R337H	Missense	Not calculated	Pathogenic	Pathogenicity not defined	COSV52691988	Liver, adrenal gland, prostate, pancreas, cervix	(Hahn et al., 2018)	10.1371/journal.pone.0209934
TP53	17	SM-82	29	Brazil	NA	rs121912664	c.1010G>A	p.Arg337His	p.R337H	Missense	Not calculated	Pathogenic	Pathogenicity not defined	COSV52691988	Liver, adrenal gland, prostate, pancreas, cervix	(Silva et al., 2014)	10.1186/1471-2350-15-55
TP53	17	SM-31	49	Brazil	NA	rs121912664	c.1010G>A	p.Arg337His	p.R337H	Missense	Not calculated	Pathogenic	Pathogenicity not defined	COSV52691988	Liver, adrenal gland, prostate, pancreas, cervix	(Silva et al., 2014)	10.1186/1471-2350-15-55
TP53	17	SM-36	49	Brazil	NA	rs121912664	c.1010G>A	p.Arg337His	p.R337H	Missense	Not calculated	Pathogenic	Pathogenicity not defined	COSV52691988	Liver, adrenal gland, prostate, pancreas, cervix	(Silva et al., 2014)	10.1186/1471-2350-15-55
TP53	17		33	Uruguay	NA	rs121913344	c.916C>T	p.Arg306Ter	p.R306*	Nonsense	Not calculated	Pathogenic	Pathogenic (0.95)	COSV52662281	Large intestine, Breast, Upper aerodigestive tract, Stomach and Oesophagus	(Valle et al., 2017)	http://revista.rmu.org.uy/ojsrmu311/index.php/rmu/article/view/112
TP53	17		44	Mexico	NA	rs267605076	c.672G>A	p.Glu224=	E224=	Splice donor	Not calculated	Pathogenic/Likely pathogenic	Pathogenic (0.99)	COSV52681634	large intestine, lung, liver, upper aerodigestive tract, billiary tract	(Gallardo-Alvardo et al., 2019)	10.1186/s12885-019-5312-2
TP53	17		35	Uruguay	NA	rs55863639	c.375G>A	p.Thr125=	p.T125=	Synonymous	Not calculated	Pathogenic	Pathogenicity not defined	COSV52718605	Large instetine, Haematopoietic and lymphoid, Upper aerodigestive tract, Central nervous system and Stomach	(Valle et al., 2017)	http://revista.rmu.org.uy/ojsrmu311/index.php/rmu/article/view/112
TP53	17		35	Uruguay	NA	rs587782144	c.473G>A	p.Arg158His	p.R185H	Missense	Not calculated	Pathogenic	Pathogenic (0.99)	COSV52680378	Large intestine, Central nervous system, Prostate, Stomach and Haematopoietic and lymphoid	(Valle et al., 2017)	http://revista.rmu.org.uy/ojsrmu311/index.php/rmu/article/view/112
XRCC2	7	DL0117735	<40	Mexico	NA	rs149186933	c.773G>A?	p.Arg258His	R258H	Missense	Not calculated	Uncertain significance	Not reported	NA	NA	(Gomez-Flores-Ramos et al., 2020)	10.20944/preprints202008.0718.v1

## Sheet: Table S2 LA BC variants-subtype
GENE	PATIENT ID	AGE AT ONSET	COUNTRY	VARIANT	LUMINAL A	LUMINAL B	HER2	TNBC	AUTHORS
ATM	16	48	Colombia	c.43del/c.43delC			✓		(Cock-Rada et al., 2018)
BRCA1	MP032	29	Brazil	c.3756_3759delGTCT			✓		(Gomez-Flores-Ramos et al., 2020)
BRCA1	ID_2023	33	Brazil	c.5266dupC			✓		(Gomez-Flores-Ramos et al., 2020)
BRCA1	CM029	47	Venezuela	c.3708T>G/3827T>G			✓		(Gomez-Flores-Ramos et al., 2020)
BRCA1	105.1	39	Brazil	c.211A>G			✓		(Gomez-Flores-Ramos et al., 2020)
BRCA1	CM001	37	Venezuela	c.1129_1135insA			✓		(Gomez-Flores-Ramos et al., 2020)
BRCA1	MP062	47	Brazil	c.3331_3334delCAAG			✓		(Gomez-Flores-Ramos et al., 2020)
BRCA1	CM001	37	Venezuela	c.4063_4065delAAT/4182_4184delAAT			✓		(Gomez-Flores-Ramos et al., 2020)
BRCA1	17	30	Mexico	c.3548A>G/c.3667A>G			✓		(Valle et al., 2017)
BRCA1	11	49	Mexico	c.3548A>G/c.3667A>G	✓				(Lara et al., 2012)
BRCA1	17	30	Mexico	NA	✓				(Vaca-Paniagua et al., 2012)
BRCA1	ID_1014	29	Brazil	c.560+2T>A	✓				(Vaca-Paniagua et al., 2012)
BRCA1	A18	21	Argentina	c.442-34T>C	✓				(Carraro et al., 2013)
BRCA1	30	24	Mexico	c.5411T>A	✓				(Brianese et al., 2018)
BRCA1	A17	25	Argentina	c.4308C>T	✓				(Brianese et al., 2018)
BRCA1	A17	25	Argentina	c.5152+66G>A	✓				(Brianese et al., 2018)
BRCA1	I	<40	Mexico	c.212+1G>T	✓				(Alemar et al., 2017)
BRCA1	A17	25	Argentina	c.548-58delT	✓				(Gonzalez-Hormazabal et al., 2011)
BRCA1	A11	12	Argentina	c.442-34C	✓				(Jara et al., 2006)
BRCA1	A11	12	Argentina	c.4308C>T	✓				(Jara et al., 2004)
BRCA1	A11	12	Argentina	c.5152+66G>A	✓				(Gonzalez-Hormazabal et al., 2011)
BRCA1	A11	12	Argentina	c.548-58delT	✓				(Solano et al., 2012)
BRCA1	CM055	48	Venezuela	c.1129_1135insA	✓				(Solano et al., 2017)
BRCA1	CM055	48	Venezuela	c.4063_4065delAAT/4182_4184delAAT	✓				(Solano et al., 2017)
BRCA1	CM039	36	Venezuela	c.3119G>A/c.3238G>A	✓				(Solano et al., 2017)
BRCA1	34.2	39	Brazil	c.211A>G	✓				(Solano et al., 2017)
BRCA1	80.2	46	Brazil	c.211A>G	✓				(Solano et al., 2017)
BRCA1	106.1	46	Brazil	c.211A>G	✓				(Solano et al., 2017)
BRCA1	98.2	38	Brazil	c.3331_3334delCAAG/3450delCAAG/3450del4/3450_3453delCAAG	✓				(Jara et al., 2004)
BRCA1	ID_2021	27	Brazil	c.300T>G	✓				(Fernandes et al., 2016)
BRCA1	ID_2017	29	Brazil	c.5266dupC	✓				(Fernandes et al., 2016)
BRCA1	ID_2034	25	Brazil	c.5251C>T	✓				(Fernandes et al., 2016)
BRCA1	ID_2026	31	Brazil	c.3331_3334delCAAG/3450del4	✓				(Fernandes et al., 2016)
BRCA1	ID_4010	35	Brazil	c.2405_2406delTG/2524delTG	✓				(Fernandes et al., 2016)
BRCA1	MJ2021	≤40	Brazil	c.181T>G	✓				(Lara et al., 2012)
BRCA1	M276	≤40	Brazil	c.181T>G	✓				(Vaca-Paniagua et al., 2012)
BRCA1	M355	41-50	Brazil	c.181T>G	✓				(Lara et al., 2012)
BRCA1	7	28	Mexico	c.3119G>A	✓				(Alemar et al., 2017)
BRCA1	M280	≤40	Brazil	c.1123_1124delinsA	✓				(Gonzalez-Hormazabal et al., 2011)
BRCA1	A9	15	Argentina	c.1067A>G	✓				(Jara et al., 2006)
BRCA1	39	27	Mexico	c.2805_2808delAGAT	✓				(Jara et al., 2004)
BRCA1	53186	31	Mexico	deletion exon 9–12	✓				(Solano et al., 2017)
BRCA1	51127	32	Mexico	deletion exon 9–12	✓				(Brianese et al., 2018)
BRCA1	53178	32	Mexico	deletion exon 9–12	✓				(Aceto et al., 2010)
BRCA1	51106	33	Mexico	deletion exon 9–12		✓			(Fernandes et al., 2016)
BRCA1	51061	34	Mexico	deletion exon 9–12		✓			(Fernandes et al., 2016)
BRCA1	53199	35	Mexico	deletion exon 9–12		✓			(Fernandes et al., 2016)
BRCA1	53205	35	Mexico	deletion exon 9–12		✓			(Gomez-Flores-Ramos et al., 2020)
BRCA1	51082	38	Mexico	deletion exon 9–12		✓			(Aceto et al., 2010)
BRCA1	53249	39	Mexico	deletion exon 9–12		✓			(Aceto et al., 2010)
BRCA1	53250	40	Mexico	deletion exon 9–12		✓			(Aceto et al., 2010)
BRCA1	51080	42	Mexico	deletion exon 9–12		✓			(Aceto et al., 2010)
BRCA1	53231	42	Mexico	deletion exon 9–12		✓			(Lara et al., 2012)
BRCA1	53206	44	Mexico	deletion exon 9–12		✓			(Lara et al., 2012)
BRCA1	51075	45	Mexico	deletion exon 9–12		✓			(Felix et al., 2014)
BRCA1	53270	46	Mexico	deletion exon 9–12		✓			(Felix et al., 2014)
BRCA1	51072	47	Mexico	deletion exon 9–12		✓			(Felix et al., 2014)
BRCA2	A11	12	Argentina	c.426+67A>C				✓	(Valle et al., 2017)
BRCA2	A11	12	Argentina	c.7435+53C>T				✓	(Gallardo-Alvardo et al., 2019)
BRCA2	A11	12	Argentina	c.426-89T>C				✓	(Gallardo-Alvardo et al., 2019)
BRCA2	A18	21	Argentina	c.7242A>G				✓	(Gomez-Flores-Ramos et al., 2020)
BRCA2	A18	21	Argentina	c.681+56C>T				✓	(Gomez-Flores-Ramos et al., 2020)
BRCA1	51119	23	Mexico	c.4327C>T/4446C>T				✓	(Carraro et al., 2013)
BRCA2	MP018	23	Brazil	c.2T>G				✓	(Gomez-Flores-Ramos et al., 2020)
BRCA2	ID_2031	24	Brazil	c.2494C>T				✓	(Gomez-Flores-Ramos et al., 2020)
BRCA2	30	24	Mexico	c.8850G>T/9078G>T				✓	(Gomez-Flores-Ramos et al., 2020)
TP53		24	Mexico	c.291delC				✓	(Gallardo-Alvardo et al., 2019)
TP53	ID_2039	24	Brazil	c.427G>A				✓	(Valle et al., 2017)
BRCA2	28	25	Mexico	c.7469T>C/7697T>C/7697T/C				✓	(Gallardo-Alvardo et al., 2019)
BRCA2	21	27	Mexico	c.7469T>C/7697T>C/7697T/C				✓	(Gallardo-Alvardo et al., 2019)
TP53		27	Mexico	c.273dupC				✓	(Silva et al., 2014)
TP53		27	Mexico	c.517G>A				✓	(Valle et al., 2017)
BRCA1	5	28	Colombia	c.5123C>A/5242C>A				✓	(Lara et al., 2012)
BRCA2	16	28	Mexico	c.5744C>T				✓	(Gomez-Flores-Ramos et al., 2020)
TP53		28	Mexico	c.844C>T				✓	(Silva et al., 2014)
BRCA1	6	29	Colombia	c.3770_3771delAG/c.3770_3771del/3889delAG				✓	(Solano et al., 2017)
BRCA1	3	29	Colombia	c.66_67delAG				✓	(Torres et al., 2017)
BRCA2	ID_2032	29	Brazil	c.4968insGT				✓	(Gomez-Flores-Ramos et al., 2020)
BRCA2	26	29	Mexico	c.10234A>G				✓	(Gomez-Flores-Ramos et al., 2020)
BRCA2	2	30	Mexico	c.10234A>G				✓	(Gomez-Flores-Ramos et al., 2020)
BRCA1	53239	31	Mexico	c.211A>G				✓	(Silva et al., 2014)
BRCA2	13	31	Colombia	c.9246dupG				✓	(Cock-Rada et al., 2018)
BRCA2	1	31	Mexico	c.5114_5117delTAAA				✓	(Gomez-Flores-Ramos et al., 2020)
PMS2	17	31	Colombia	c.137G>T				✓	(Hahn et al., 2018)
BRCA1	53221	32	Mexico	c.4327C>T/4446C>T				✓	(Carraro et al., 2013)
BRCA1	4	32	Colombia	c.1674delA/1793delA				✓	(Solano et al., 2017)
BRCA2	27	33	Mexico	c.7469T>C/7697T>C/7697T/C				✓	(Gallardo-Alvardo et al., 2019)
BRCA1	53273	34	Mexico	c.211A>G				✓	(Solano et al., 2017)
BRCA1	51039	34	Mexico	c.66_67delAG				✓	(Aceto et al., 2010)
BRCA1	53226	35	Mexico	c.5123C>A/5242C>A				✓	(Cipriano et al., 2018)
BRCA1	53188	35	Mexico	c.2806_2809delGATA/2925del4				✓	(Torres et al., 2017)
BRCA2	ID_2048	35	Brazil	c.5190T>A				✓	(Gomez-Flores-Ramos et al., 2020)
BRCA2	ID_2025	35	Brazil	c.2808_2811del/c.2806_2809delAAAC/3036del4/3034del4/c.2808_2811delACAA/3036_3039delACAA				✓	(Gomez-Flores-Ramos et al., 2020)
BRCA2	8	35	Colombia	c.5616_5620delAGTAA/5844del5				✓	(Gomez-Flores-Ramos et al., 2020)
BRCA2	11	35	Colombia	c.9246dupG				✓	(Gomez-Flores-Ramos et al., 2020)
BRCA2	CM039	36	Venezuela	c.9799T>C				✓	(Valle et al., 2017)
BRCA2	19	36	Mexico	c.7469T>C/7697T>C/7697T/C				✓	(Carraro et al., 2013)
PALB2	15	36	Colombia	c.1240C>T				✓	(Giacomazzi et al., 2014)
TP53		36	Mexico	c.604C>T				✓	(Valle et al., 2017)
BRCA1	51094	37	Mexico	c.824_825ins10/943ins10				✓	(Lara et al., 2012)
BRCA1	51066	37	Mexico	c.2806_2809delGATA/2925del4				✓	(Alemar et al., 2017)
BRCA1	53271	38	Mexico	c.211A>G				✓	(Gonzalez-Hormazabal et al., 2011)
BRCA1	51088	38	Mexico	c.2296_2297delAG/2415delAG				✓	(Solano et al., 2017)
BRCA1	53240	39	Mexico	c.4327C>T/4446C>T				✓	(Carraro et al., 2013)
BRCA1	51084	39	Mexico	c.2806_2809delGATA/2925del4				✓	(Fernandes et al., 2016)
BRCA2	31	39	Mexico	c.7469T>C/7697T>C/7697T/C				✓	(Silva et al., 2014)
BRCA2	10	39	Colombia	c.9246dupG				✓	(Gomez-Flores-Ramos et al., 2020)
BRCA2	31	39	Mexico	c.10234A>G				✓	(Assumpção et al., 2008)
BRCA1	53252	41	Mexico	c.3598C>T/3717C>T				✓	(Delgado et al., 2011)
BRCA2	9	41	Colombia	c.9246dupG				✓	(Cipriano et al., 2018)
BRCA2	7	41	Colombia	deletion exons 15-16				✓	(Gomez-Flores-Ramos et al., 2020)
BRCA1	51103	42	Mexico	c.824_825ins10/943ins10				✓	(Vaca-Paniagua et al., 2012)
BRCA1	51071	42	Mexico	c.211A>G				✓	(Solano et al., 2017)
BRCA1	51091	42	Mexico	c.2806_2809delGATA/2925del4				✓	(Alemar et al., 2017)
BRCA1	53191	42	Mexico	c.66_67delAG				✓	(Gomez-Flores-Ramos et al., 2020)
BRCA2	MP079	43	Brazil	c.4829_4830delTG				✓	(Gomez-Flores-Ramos et al., 2020)
BRCA2	14	43	Colombia	c.6024dupG				✓	(Gomez-Flores-Ramos et al., 2020)
BRCA2	12	43	Colombia	c.9246dupG				✓	(Cock-Rada et al., 2018)
BRCA1	M287	44	Brazil	c.4183C>T				✓	(Calderón-Garcidueñas et al., 2005)
BRCA1	53247	44	Mexico	c.3759_3760delTA/3878delTA				✓	(Fernandes et al., 2016)
BRCA1	53237	45	Mexico	c.824_825ins10/943ins10				✓	(Vaca-Paniagua et al., 2012)
BRCA1	53243	46	Mexico	c.66_67delAG				✓	(Gomez-Flores-Ramos et al., 2020)
BRCA2	51085	46	Mexico	c.2224C>T/2452C>T/2451C>T				✓	(Cipriano et al., 2018)
BRCA1	51093	47	Mexico	c.824_825ins10/943ins10				✓	(Carraro et al., 2013)
BRCA1	53204	47	Mexico	c.4327C>T/4446C>T				✓	(Aceto et al., 2010)
BRCA2	CM069	47	Venezuela	c.10234A>G				✓	(Gomez-Flores-Ramos et al., 2020)
BRCA1	53255	48	Mexico	c.824_825ins10/943ins10				✓	(Carraro et al., 2013)
BRCA2	MP005	48	Brazil	c.2T>G				✓	(Villarreal-Garza et al., 2015)
BRCA1	53253	49	Mexico	deletion exon 9–12				✓	(Felix et al., 2014)
BRCA1	51068	49	Mexico	c.3759_3760delTA/3878delTA				✓	(Solano et al., 2017)
BRCA1	III	<40	Mexico	ex9-12del				✓	(Felix et al., 2014)
BRCA1	II	<40	Mexico	c.66_67AG				✓	(Torres et al., 2017)
BRCA2	VII	<40	Mexico	c.5631del				✓	(Jara et al., 2007)
BRCA2	IV	<40	Mexico	c.5542del				✓	(Valle et al., 2017)
BRCA2	VI	<40	Mexico	c.7525dup				✓	(Gomez-Flores-Ramos et al., 2020)
BRCA2	VIII	<40	Mexico	c.9235del				✓	(Assumpção et al., 2008)
BRCA2	V	<40	Mexico	c.8168A>G				✓	(Assumpção et al., 2008)
PALB2	X	<40	Mexico	c.2336C>G				✓	(Gomes et al., 2012)
PALB2	IX	<40	Mexico	c.2411_2412delCT				✓	(Gomes et al., 2012)
RAD51C	XII	<40	Mexico	c.519dup,T/TT				✓	(Silva et al., 2014)
TP53	XI	<40	Mexico	c.524G>A				✓	(Gomez-Flores-Ramos et al., 2020)
BRCA1	M281	≤40	Brazil	c.5644_5647delTCAA				✓	(Cipriano et al., 2018)
BRCA1	SM95	≤40	Brazil	c.4287C>A				✓	(Carraro et al., 2013)
BRCA1	M256	≤40	Brazil	c.1A>G				✓	(Ruiz-Flores et al., 2002)
BRCA1	M282	≤40	Brazil	c.2405_2406delTG/2524delTG				✓	(Solano et al., 2017)
BRCA1	M292	≤40	Brazil	c.4096+1G>A				✓	(Gomez-Flores-Ramos et al., 2020)
BRCA1	M303	41-50	Brazil	c.4484G>T				✓	(Solano et al., 2018)

## Sheet: Table S3 BC Cell Lines
	BC cell lines	Subtype	Database	DNA repair gene variant
				CCLE	COSMIC
1	AU65	H	CCLE + COSMIC	✓	✓
2	BT-20	TN	CCLE + COSMIC	✓	✓
3	BT-474	LB	CCLE + COSMIC	✓	✓
4	BT-483	LA	CCLE + COSMIC	✓	✓
5	BT-549	TN	CCLE + COSMIC	✓	✓
6	CAL-120	TN	CCLE + COSMIC	✓	✓
7	CAL-148	TN	CCLE + COSMIC	✓	✓
8	CAL-51	TN	CCLE + COSMIC	✓	✓
9	CAL-85-1	TN	CCLE + COSMIC	✓	✓
10	CAMA-1	LA	CCLE + COSMIC	✓	✓
11	COLO-824	TN	CCLE + COSMIC	✓	✓
12	DU-4475	TN	CCLE + COSMIC	✓	✓
13	EFM-19	LA	CCLE + COSMIC	✓	✓
14	EFM192A	LB	CCLE + COSMIC	✓	✓
15	EVSAT	LA/H	CCLE + COSMIC	✓	✓
16	HCC1143	TN	CCLE + COSMIC	✓	✓
17	HCC1187	TN	CCLE + COSMIC	NO	✓
18	HCC1395	TN	CCLE + COSMIC	✓	✓
19	HCC1419	LB/H	CCLE + COSMIC	✓	✓
20	HCC1428	LA	CCLE + COSMIC	✓	✓
21	HCC1500	LA/TN	CCLE + COSMIC	✓	✓
22	HCC1569	H	CCLE + COSMIC	✓	✓
23	HCC1599	TN	CCLE + COSMIC	✓	✓
24	HCC1806	TN	CCLE + COSMIC	✓	✓
25	HCC1937	TN	CCLE + COSMIC	✓	✓
26	HCC1954	H	CCLE + COSMIC	✓	✓
27	HCC202	H	CCLE + COSMIC	✓	✓
28	HCC2157	TN	CCLE + COSMIC	✓	✓
29	HCC2218	H	CCLE + COSMIC	✓	✓
30	HCC38	TN	CCLE + COSMIC	✓	✓
31	HCC70	TN	CCLE + COSMIC	✓	✓
32	HDQ-P1	TN	CCLE + COSMIC	✓	✓
33	HMC-1-8	LA	CCLE	✓	NO
34	HMEL	BL	CCLE	✓	NO
35	Hs 274-T	BL/LB	CCLE	✓	NO
36	Hs 281-T	BL/H-amp	CCLE	✓	NO
37	Hs 343-T	BL/H-amp	CCLE	✓	NO
38	Hs 578-T	TN	CCLE + COSMIC	✓	✓
39	Hs 606-T	LA/LB	CCLE	NO	NO
40	HS739T	BL	CCLE	✓	NO
41	HS742T	LA	CCLE	✓	NO
42	JIMT1	H	CCLE + COSMIC	✓	✓
43	KPL1	LA	CCLE	✓	NO
44	MCF7	LA	CCLE + COSMIC	✓	✓
45	MDA-MB-134VI	LA	CCLE	✓	NO
46	MDA-MB-157	TN	CCLE + COSMIC	✓	✓
47	MDA-MB-175VII	LA	CCLE + COSMIC	✓	✓
48	MDA-MB-231	TN	CCLE + COSMIC	✓	✓
49	MDA-MB-330	LB	CCLE + COSMIC	✓	✓
50	MDA-MB-361	LB	CCLE + COSMIC	✓	✓
51	MDA-MB-415	LA	CCLE + COSMIC	✓	✓
52	MDA-MB-436	TN	CCLE + COSMIC	✓	✓
53	MDA-MB-453	H	CCLE + COSMIC	✓	✓
54	MDA-MB-468	TN	CCLE + COSMIC	✓	✓
55	MFM-223	TN	CCLE + COSMIC	✓	✓
56	MRK-nu-1	ER-	CCLE + COSMIC	✓	✓
57	OCUB-M	TN	CCLE + COSMIC	✓	✓
58	SKBR3	H	CCLE	✓	NO
59	T47D	LA	CCLE + COSMIC	✓	✓
60	UACC-812	LB	CCLE + COSMIC	✓	✓
61	UACC-893	H	CCLE + COSMIC	✓	✓
62	YMB-1-E	LA/LB	CCLE + COSMIC	✓	✓
63	ZR751	LA	CCLE	✓	NO
64	ZR-75-30	LB	CCLE + COSMIC	✓	✓
65	SUM149PT	TN	CCLE	✓	NO
66	SUM159PT	TN	CCLE	✓	NO
67	SUM229PE	TN	CCLE	✓	NO
BL, Basal-like; LA, Luminal A; LB, Luminal B; H, HER2 +; H-amp, HER2 amplification; TN, Triple negative.

## Sheet: Table S4 Drugs concentration
DATASET	COSMIC ID	CELL LINE	DRUG ID	DRUG NAME	PUTATIVE TARGET	PATHWAY NAME	COMPANY ID	MIN CONC	MAX CONC	LN IC50	uM	log10 (-)	AUC	RMSE	Z SCORE
GDSC2	910704	AU565	2048	Vinorelbine	Microtubule destabiliser	Mitosis	1046	0.0001	0.1	-5.05144	0.0064001	2.19381	0.58977	0.172446	-1.0358
GDSC2	910704	AU565	1819	Docetaxel	Microtubule stabiliser	Mitosis	1043	0.003002	3	-4.76474	0.0085251	2.0693	0.213438	0.130557	-0.83618
GDSC2	910704	AU565	1911	Dactinomycin	RNA polymerase	Other	1046	0.0008	0.8	-3.46576	0.0312493	1.50516	0.527022	0.125234	0.843313
GDSC2	910704	AU565	1941	Sepantronium bromide	BIRC5	Apoptosis regulation	1046	0.010005	10	-3.30587	0.0366672	1.43572	0.239682	0.059751	0.524433
GDSC2	910704	AU565	1709	CDK9_5038	CDK9	Cell cycle	1001	0.003002	3	-3.27942	0.0376501	1.42423	0.38152	0.141786	-0.624336
GDSC2	910704	AU565	1180	Dinaciclib	CDK1, CDK2, CDK5, CDK9	Cell cycle	1046	0.001001	1	-3.19481	0.0409742	1.38749	0.533135	0.129907	-0.402365
GDSC2	910704	AU565	1818	Vincristine		Mitosis	1043	0.003002	3	-2.90618	0.0546842	1.26214	0.42963	0.199916	-0.463229
GDSC2	910704	AU565	1190	Gemcitabine	Pyrimidine antimetabolite	DNA replication	1046	0.0001	10	-2.76111	0.0632216	1.19913	0.558969	0.252671	-0.774441
GDSC2	910704	AU565	1034	Staurosporine	Broad spectrum kinase inhibitor	RTK signaling	1046	0.007813	2	-2.72771	0.0653691	1.18463	0.406227	0.076501	0.089823
GDSC2	910704	AU565	1720	AZD5991	MCL1	Apoptosis regulation	1001	0.010005	10	-1.79278	0.166497	0.778594	0.417313	0.156376	-2.11504
GDSC2	910704	AU565	1032	Afatinib	ERBB2, EGFR	EGFR signaling	1046	0.002001	10	-1.59552	0.202803	0.692925	0.539658	0.250113	-2.03528
GDSC2	910704	AU565	1862	MG-132	Proteasome, CAPN1	Protein stability and degradation	1046	0.015625	4	-1.40916	0.244349	0.611989	0.496666	0.11081	-0.001054
GDSC2	910704	AU565	1708	CDK9_5576	CDK9	Cell cycle	1001	0.010005	10	-1.05323	0.348809	0.457413	0.51266	0.121596	-0.566982
GDSC2	910704	AU565	1558	Lapatinib	EGFR, ERBB2	EGFR signaling	1046	0.009766	10	-0.8194	0.440696	0.355861	0.543884	0.168316	-2.14553
GDSC2	910704	AU565	1799	Ibrutinib	BTK	Other, kinases	1046	0.010005	10	-0.557038	0.572903	0.241919	0.575791	0.279553	-2.69254
GDSC2	910704	AU565	1804	Acetalax		Unclassified	1043	0.030016	30	-0.001311	0.99869	0.00056936	0.506548	0.195416	-2.2006
GDSC2	749710	HCC1143	1911	Dactinomycin	RNA polymerase	Other	1046	0.0008	0.8	-3.68341	0.0251371	1.59968	0.499233	0.141006	0.69724
GDSC2	749710	HCC1143	1941	Sepantronium bromide	BIRC5	Apoptosis regulation	1046	0.010005	10	-2.34997	0.0953717	1.02058	0.364096	0.090586	1.13104
GDSC2	749710	HCC1143	1034	Staurosporine	Broad spectrum kinase inhibitor	RTK signaling	1046	0.007813	2	-2.23613	0.106871	0.971138	0.48012	0.113051	0.453848
GDSC2	749710	HCC1143	1022	AZD7762	CHEK1, CHEK2	Cell cycle	1046	0.000977	10	-1.58223	0.205517	0.687152	0.570883	0.144419	-1.18328
GDSC2	749710	HCC1143	1862	MG-132	Proteasome, CAPN1	Protein stability and degradation	1046	0.015625	4	-0.802101	0.448386	0.348348	0.573728	0.110303	0.676239
GDSC2	749712	HCC1395	1004	Vinblastine	Microtubule destabiliser	Mitosis	1046	0.0001	0.1	-5.1459	0.00582325	2.23483	0.575815	0.094682	-0.754143
GDSC2	749712	HCC1395	1034	Staurosporine	Broad spectrum kinase inhibitor	RTK signaling	1046	0.007813	2	-4.33522	0.013099	1.88276	0.211669	0.076613	-1.10058
GDSC2	749712	HCC1395	1911	Dactinomycin	RNA polymerase	Other	1046	0.0008	0.8	-4.05774	0.017288	1.76226	0.45254	0.098301	0.446012
GDSC2	749712	HCC1395	1022	AZD7762	CHEK1, CHEK2	Cell cycle	1046	0.000977	10	-2.32432	0.0978498	1.00944	0.498994	0.089297	-1.67347
GDSC2	749712	HCC1395	1941	Sepantronium bromide	BIRC5	Apoptosis regulation	1046	0.010005	10	-2.30067	0.100192	0.999167	0.358857	0.122805	1.16233
GDSC2	749714	HCC1937	1941	Sepantronium bromide	BIRC5	Apoptosis regulation	1046	0.010005	10	-3.91291	0.0199822	1.69936	0.201414	0.066948	0.139209
GDSC2	749714	HCC1937	1911	Dactinomycin	RNA polymerase	Other	1046	0.0008	0.8	-3.29187	0.0371844	1.42964	0.545754	0.261986	0.960016
GDSC2	749714	HCC1937	1034	Staurosporine	Broad spectrum kinase inhibitor	RTK signaling	1046	0.007813	2	-2.44328	0.086875	1.06111	0.452019	0.105365	0.300444
GDSC2	749714	HCC1937	1862	MG-132	Proteasome, CAPN1	Protein stability and degradation	1046	0.015625	4	-1.73756	0.175949	0.754614	0.45367	0.135235	-0.367456
GDSC2	907048	HCC70	1911	Dactinomycin	RNA polymerase	Other	1046	0.0008	0.8	-4.52563	0.0108279	1.96546	0.385053	0.117516	0.132
GDSC2	907048	HCC70	1617	AZD5582	XIAP, cIAP	Apoptosis regulation	1046	0.010005	10	-3.95341	0.0191891	1.71694	0.15324	0.205716	-2.77388
GDSC2	907048	HCC70	1709	CDK9_5038	CDK9	Cell cycle	1001	0.003002	3	-3.90956	0.0200494	1.6979	0.304001	0.130557	-0.978574
GDSC2	907048	HCC70	1180	Dinaciclib	CDK1, CDK2, CDK5, CDK9	Cell cycle	1046	0.001001	1	-3.89116	0.0204217	1.68991	0.440436	0.161183	-0.893538
GDSC2	907048	HCC70	1034	Staurosporine	Broad spectrum kinase inhibitor	RTK signaling	1046	0.007813	2	-3.61922	0.0268037	1.57181	0.264654	0.08345	-0.570364
GDSC2	907048	HCC70	1862	MG-132	Proteasome, CAPN1	Protein stability and degradation	1046	0.015625	4	-2.28446	0.101829	0.992128	0.35841	0.119439	-0.977628
GDSC2	907048	HCC70	1529	Pevonedistat	NAE	Other	1046	0.010005	10	-1.55216	0.21179	0.674095	0.445376	0.093373	-1.19016
GDSC2	907048	HCC70	1022	AZD7762	CHEK1, CHEK2	Cell cycle	1046	0.000977	10	-1.49984	0.223165	0.651373	0.586436	0.077645	-1.12885
GDSC2	907048	HCC70	1941	Sepantronium bromide	BIRC5	Apoptosis regulation	1046	0.010005	10	-1.45343	0.233767	0.631217	0.458792	0.096371	1.69999
GDSC2	907048	HCC70	1708	CDK9_5576	CDK9	Cell cycle	1001	0.010005	10	-1.38286	0.250861	0.600567	0.46992	0.078763	-0.801997
GDSC2	907048	HCC70	1804	Acetalax		Unclassified	1043	0.030016	30	-0.808274	0.445627	0.351029	0.397492	0.105416	-2.58632
GDSC2	907048	HCC70	1733	ULK1_4989	ULK1	Other, kinases	1001	0.030016	30	0.068836	1.07126	-0.0298951	0.51574	0.104776	-1.50516
GDSC2	908123	MDA-MB-468	1819	Docetaxel	Microtubule stabiliser	Mitosis	1043	0.003002	3	-5.75197	0.00317651	2.49805	0.115317	0.196206	-1.16998
GDSC2	908123	MDA-MB-468	1941	Sepantronium bromide	BIRC5	Apoptosis regulation	1046	0.010005	10	-5.73929	0.00321705	2.49254	0.049367	0.053057	-1.01981
GDSC2	908123	MDA-MB-468	1712	Eg5_9814	KSP11	Other	1001	0.0001	0.1	-5.61845	0.00363027	2.44006	0.516969	0.131824	-1.53109
GDSC2	908123	MDA-MB-468	1911	Dactinomycin	RNA polymerase	Other	1046	0.0008	0.8	-5.17791	0.00563979	2.24874	0.306422	0.065732	-0.305765
GDSC2	908123	MDA-MB-468	1818	Vincristine		Mitosis	1043	0.003002	3	-4.89274	0.00750086	2.12489	0.190361	0.236172	-1.26338
GDSC2	908123	MDA-MB-468	1180	Dinaciclib	CDK1, CDK2, CDK5, CDK9	Cell cycle	1046	0.001001	1	-4.27875	0.01386	1.85824	0.391592	0.118244	-1.16693
GDSC2	908123	MDA-MB-468	1034	Staurosporine	Broad spectrum kinase inhibitor	RTK signaling	1046	0.007813	2	-3.76447	0.0231798	1.63489	0.256453	0.089251	-0.677931
GDSC2	908123	MDA-MB-468	1709	CDK9_5038	CDK9	Cell cycle	1001	0.003002	3	-3.52662	0.0294043	1.53159	0.358077	0.077686	-0.7633
GDSC2	908123	MDA-MB-468	1827	Dihydrorotenone		Unclassified	1043	0.001001	1	-2.7433	0.0643577	1.1914	0.59351	0.091882	-2.36224
GDSC2	908123	MDA-MB-468	1051	Alisertib	AURKA	Mitosis	1046	0.002001	10	-2.17086	0.11408	0.942792	0.47582	0.190836	-1.91349
GDSC2	908123	MDA-MB-468	1862	MG-132	Proteasome, CAPN1	Protein stability and degradation	1046	0.015625	4	-1.8935	0.150544	0.822336	0.422849	0.12536	-0.541433
GDSC2	908123	MDA-MB-468	1808	Topotecan		DNA replication	1043	0.003002	3	-1.73695	0.176056	0.754349	0.581477	0.06828	-0.966934
GDSC2	908123	MDA-MB-468	1708	CDK9_5576	CDK9	Cell cycle	1001	0.010005	10	-1.54605	0.213087	0.671443	0.45142	0.091071	-0.918354
GDSC2	908123	MDA-MB-468	1738	IGF1R_3801	IGFR1	IGF1R signaling	1001	0.010005	10	-1.2437	0.288316	0.540131	0.488583	0.123885	-1.4986
GDSC2	908123	MDA-MB-468	1849	Sabutoclax	BCL2, BCL-XL, BFL1, MCL1	Apoptosis regulation	1046	0.010005	10	-0.960648	0.382645	0.417204	0.525195	0.084663	-0.387653
GDSC2	908123	MDA-MB-468	1804	Acetalax		Unclassified	1043	0.030016	30	-0.275569	0.75914	0.119678	0.470473	0.081507	-2.33169
GDSC2	908123	MDA-MB-468	1733	ULK1_4989	ULK1	Other, kinases	1001	0.030016	30	-0.010789	0.989269	0.0046856	0.505129	0.125282	-1.55811
